# Supplementary material for: Triterpenoid–PEG Ribbons Targeting Selectivity in Pharmacological Effects
Source: MDPI journal article supplement (doi:10.3390/biomedicines9080951), 2021-08-03
Supplement: s1 [file s1]

## Supplementary material

### Triterpenoid–PEG ribbons targeting selectivity in pharmacological effects

Zulal Özdemir,<sup>1a,2,†</sup> Uladzimir Bildziukevich,<sup>1a,2,†</sup> Martina Čapková,<sup>1a,†</sup> Petra Lovecká,<sup>1b</sup> Lucie Rárová,<sup>3#</sup> David Šaman,<sup>4</sup> Michala Zgarbová,<sup>4,#</sup> Barbora Lapuníková,<sup>4,#</sup> Jan Weber,<sup>4</sup> Oxana Kazakova<sup>5</sup> and Zdeněk Wimmer<sup>\*,1a,2</sup>

<sup>1</sup> University of Chemistry and Technology in Prague, <sup>1a</sup> Department of Chemistry of Natural Compounds, <sup>1b</sup> Department of Biochemistry and Microbiology, Technická 5, 16628 Prague 6, Czech Republic;

<sup>2</sup> Institute of Experimental Botany of the Czech Academy of Sciences, Isotope Laboratory, Vídeňská 1083, 14220 Prague 4, Czech Republic;

<sup>3</sup> Department of Experimental Biology, Faculty of Science, Palacký University, Šlechtitelů 27, CZ-78371 Olomouc, Czech Republic;

<sup>4</sup> Institute of Organic Chemistry and Biochemistry of the Czech Academy of Sciences, Flemingovo náměstí 2, 16610 Prague 6, Czech Republic;

<sup>5</sup> Ufa Institute of Chemistry of the Russian Academy of Sciences, 71, pr. Oktyabrya, 450054 Ufa, Russian Federation.

#### Content

|                                                   |    |
|---------------------------------------------------|----|
| 1. Synthetic procedures and analytical data       | 2  |
| 2. Antimicrobial screening tests                  | 48 |
| 3. Gel formation and supramolecular self-assembly | 49 |

## 1. Synthetic procedures and analytical data

### 1.1. Benzyl (3 $\beta$ )-3-hydroxyolean-12-en-28-oate (**2a**)

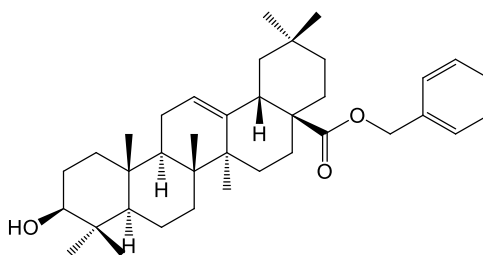

Procedure A was applied, using **1a** as the starting compound, yielding **2a** in a 96 % yield.

**<sup>1</sup>H NMR:**  $\delta$  0.60 (3H, d,  $J$ =0.5 Hz, H26), 0.71 (1H, dd,  $J_1$ =2.0 Hz,  $J_2$ =11.6 Hz, H5), 0.77 (3H, s, H25), 0.87 (3H, d,  $J$ =0.8 Hz, H24), 0.89 (3H, s, H29), 0.91 (3H, s, H30), 0.97 (3H, s, H23), 1.04 (2H, ddd,  $J_1$ =2.7 Hz,  $J_2$ =3.9 Hz,  $J_3$ =13.8 Hz, H16), 1.12 (3H, d,  $J$ =0.8 Hz, H27), 1.23 (2H, dt,  $J_1$ =3.0 Hz,  $J_2$ =3.0 Hz,  $J_3$ =12.5 Hz, H7), 1.62-1.67 (2H, m, H11), 1.71 (2H, dt,  $J_1$ =4.4 Hz,  $J_2$ =13.9 Hz,  $J_3$ =13.9 Hz, H22), 1.83-1.87 (2H, m, H2), 1.97 (2H, dt,  $J_1$ =4.0 Hz,  $J_2$ =13.5 Hz,  $J_3$ =13.5 Hz, H11), 2.90 (1H, bdd,  $J_1$ =4.7 Hz,  $J_2$ =13.8 Hz, H18), 3.20 (1H, dd,  $J_1$ =4.4 Hz,  $J_2$ =11.5 Hz, H3), 5.04 (2H, d,  $J$ =12.5 Hz, H1'), 5.09 (2H, d,  $J$ =12.5 Hz, H1'), 5.28 (1H, t,  $J$ =3.7 Hz, H12), 7.28-7.37 (1H, m, H4'), 7.28-7.37 (1H, m, H3'), 7.28-7.37 (1H, m, H5').

**<sup>13</sup>C NMR:**  $\delta$  15.28 (q, C24), 15.56 (q, C25), 16.87 (q, C26), 18.30 (t, C6), 23.04 (t, C11), 23.63 (q, C30), 25.87 (q, C27), 27.18 (t, C15), 27.61 (t, C16), 28.09 (q, C23), 30.69 (s, C20), 32.36 (t, C22), 32.69 (t, C7), 33.09 (q, C29), 33.85 (t, C21), 36.99 (s, C10), 38.42 (s, C4), 38.73 (t, C1), 39.27 (s, C8), 41.36 (d, C18), 41.67 (s, C14), 43.38 (t, C2), 45.86 (t, C19), 46.73 (s, C17), 47.59 (d, C9), 55.19 (d, C5), 65.91 (t, C1'), 79.00 (d, C3), 122.48 (d, C12), 127.89 (d, C5'), 127.96 (d, C3'), 128.39 (d, C4'), 136.42 (s, C2'), 143.68 (s, C13), 177.45 (s, C28).

**MS (ES):**  $m/z$  = 547.3 [M+H]<sup>+</sup>.

### 1.2. Benzyl (3 $\beta$ )-3-(prop-2-yn-1-yloxy)olean-12-en-28-oate (**3a**)

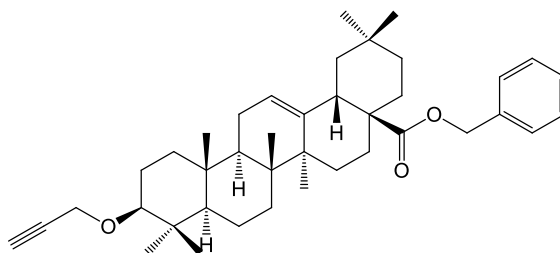

Procedure B was applied, using **2a** as the starting compound, yielding **3a** in an 86 % yield.

**<sup>1</sup>H NMR:**  $\delta$  0.59 (3H, s, H26), 0.75 (3H, s, H25), 0.86 (3H, s, H24), 0.87 (3H, s, H29), 0.90 (3H, s, H30), 0.97 (3H, s, H23), 1.02 (2H, ddd,  $J_1=2.7$  Hz,  $J_2=4.2$  Hz,  $J_3=13.8$  Hz, H15), 1.10 (3H, d,  $J=0.8$  Hz, H27), 1.53 (2H, ddd,  $J_1=2.9$  Hz,  $J_2=4.2$  Hz,  $J_3=13.7$  Hz, H22), 1.59 (2H, m,  $J_1=0.8$  Hz,  $J_2=0.8$  Hz,  $J_3=0.8$  Hz,  $J_4=4.3$  Hz,  $J_5=13.8$  Hz,  $J_6=13.8$  Hz, H15), 1.71 (1H, dd,  $J_1=1.9$  Hz,  $J_2=11.8$  Hz, H5), 1.79-1.88 (2H, m, H2), 1.96 (2H, dt,  $J_1=4.0$  Hz,  $J_2=13.6$  Hz,  $J_3=13.6$  Hz, H11), 2.34 (1H, t,  $J=2.4$  Hz, H8'), 2.88 (1H, bdd,  $J_1=4.6$  Hz,  $J_2=13.9$  Hz, H18), 3.00 (1H, dd,  $J_1=4.4$  Hz,  $J_2=11.6$  Hz, H3), 4.13 (2H, dd,  $J_1=2.4$  Hz,  $J_2=16.0$  Hz, H6'), 4.20 (2H, dd,  $J_1=2.4$  Hz,  $J_2=16.0$  Hz, H6'), 5.03 (2H, d,  $J=12.5$  Hz, H1'), 5.07 (2H, d,  $J=12.5$  Hz, H1'), 5.27 (1H, t,  $J=3.7$  Hz, H12), 7.26-7.35 (1H, m, H4'), 7.26-7.35 (1H, m, H3'), 7.26-7.35 (1H, m, H5').

**<sup>13</sup>C NMR:**  $\delta$  15.28 (q, C24), 16.39 (q, C25), 16.88 (q, C26), 18.24 (t, C6), 22.36 (t, C16), 23.04 (t, C11), 23.42 (t, C2), 23.64 (q, C30), 25.86 (q, C27), 27.60 (t, C15), 28.09 (q, C23), 30.69 (s, C20), 32.36 (t, C22), 32.70 (t, C7), 33.10 (q, C29), 33.85 (t, C21), 36.93 (s, C10), 38.28 (t, C1), 38.47 (s, C4), 39.32 (s, C8), 41.37 (d, C18), 41.68 (s, C14), 45.86 (t, C19), 46.73 (s, C17), 47.57 (d, C9), 55.76 (d, C5), 56.42 (t, C6'), 65.91 (t, C1'), 73.41 (d, C8'), 80.96 (s, C7'), 85.88 (d, C3), 122.50 (d, C12), 127.89 (d, C5'), 127.97 (d, C4'), 128.40 (d, C3'), 136.43 (s, C2'), 143.71 (s, C13), 177.43 (s, C28).

**MS (ES):**  $m/z$  = 585.1 [M+H]<sup>+</sup>; 529,3 [M-H]<sup>-</sup>

### 1.3. 3-*O*-Acetyloleanolic acid (**4a**)

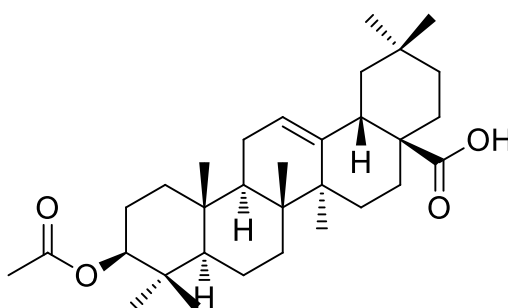

Procedure C was applied, using **1a** as the starting compound, yielding **4a** in a 99 % yield.

**<sup>1</sup>H NMR:**  $\delta$  0.68 (3H, s, H26), 0.77 (1H, dd,  $J_1=1.9$  Hz,  $J_2=11.8$  Hz, H5), 0.78 (3H, s, H24), 0.80 (3H, s, H23), 0.84 (3H, s, H29), 0.86 (3H, s, H30), 0.87 (3H, s, H25), 1.00 (2H, ddd,  $J_1=2.7$  Hz,  $J_2=4.0$  Hz,  $J_3=14.1$  Hz, H15), 1.06 (3H, d, H27), 1.09 (2H, ddd,  $J_1=2.3$  Hz,  $J_2=4.7$  Hz,

$J_3=13.7$  Hz, H19), 1.15 (2H, ddt,  $J_1=2.6$  Hz,  $J_2=2.6$  Hz,  $J_3=4.9$  Hz,  $J_4=13.5$  Hz, H21), 1.22 (2H, dt,  $J_1=3.2$  Hz,  $J_2=3.2$  Hz,  $J_3=12.1$  Hz, H7), 1.27 (2H, dt,  $J_1=4.0$  Hz,  $J_2=14.7$  Hz,  $J_3=13.7$  Hz, H21), 1.38 (2H, dt,  $J_1=3.8$  Hz,  $J_2=12.4$  Hz,  $J_3=12.4$  Hz, H7), 1.64 (2H, dt,  $J_1=4.2$  Hz,  $J_2=14.2$  Hz,  $J_3=14.2$  Hz, H15), 1.70 (2H, dt,  $J_1=4.4$  Hz,  $J_2=13.8$  Hz,  $J_3=13.8$  Hz, H22), 1.79 (2H, ddd,  $J_1=3.5$  Hz,  $J_2=7.1$  Hz,  $J_3=18.6$  Hz, H2), 1.84 (2H, ddd,  $J_1=3.5$  Hz,  $J_2=10.7$  Hz,  $J_3=18.6$  Hz, H2), 1.91 (2H, dt,  $J_1=4.2$  Hz,  $J_2=14.2$  Hz,  $J_3=14.2$  Hz, H16), 1.98 (3H, s, H2'), 2.75 (1H, dd,  $J_1=4.5$  Hz,  $J_2=13.5$  Hz, H18), 4.41 (1H, dd,  $J_1=4.5$  Hz,  $J_2=10.8$  Hz, H3), 5.21 (1H, t,  $J=3.7$  Hz, H12).

**$^{13}\text{C}$  NMR:**  $\delta$  15.36 (q, C25), 16.64 (q, C24), 17.15 (q, C26), 18.15 (t, C6), 21.30 (q, C2'), 22.85 (t, C16), 23.37 (t, C2), 23.50 (t, C11), 23.56 (q, C30), 25.89 (q, C27), 27.64 (t, C15), 28.02 (q, C23), 30.65 (s, C20), 32.41 (t, C22), 32.49 (t, C7), 33.04 (q, C29), 33.76 (t, C21), 36.96 (s, C4), 37.67 (s, C10), 38.03 (t, C1), 39.25 (s, C8), 40.89 (d, C18), 41.52 (s, C14), 45.80 (t, C19), 46.52 (s, C17), 47.52 (d, C9), 55.26 (d, C5), 80.91 (d, C3), 122.53 (d, C12), 143.58 (s, C13), 171.04 (s, C1'), 183.92 (s, C28).

**MS (ES):**  $m/z = 516.1$   $[\text{M}+\text{H}]^+$ ; 497.1  $[\text{M}-\text{H}]^-$

1.4. (3 $\beta$ )-28-[(2-{2-[2-(2-Azidoethoxy)ethoxy]ethoxy}ethyl)amino]-28-oxoolean-12-en-3-yl acetate (**5a**)

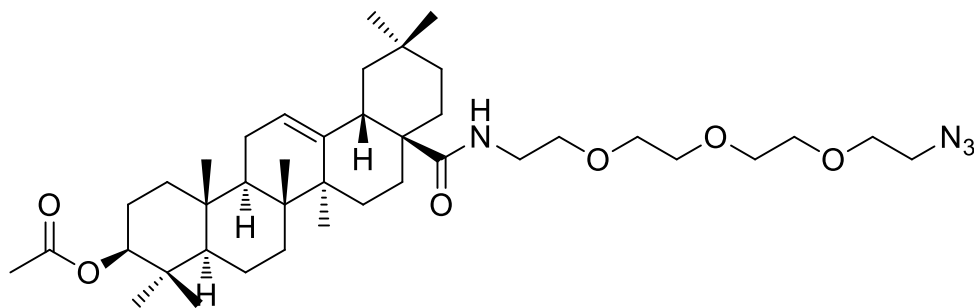

Procedure E was applied, using **4a** as the starting compound, yielding **5a** in a 68 % yield.

**$^1\text{H}$  NMR:**  $\delta$  0.77 (3H, s, H26), 0.83 (1H, dd,  $J_1=2.0$  Hz,  $J_2=11.6$  Hz, H5), 0.85 (3H, s, H25), 0.86 (3H, s, H23), 0.90 (3H, s, H30), 0.90 (3H, s, H29), 0.93 (3H, s, H24), 1.15 (3H, d,  $J=0.5$  Hz, H27), 1.68 (2H, ddd,  $J_1=2.9$  Hz,  $J_2=4.1$  Hz,  $J_3=14.1$  Hz, H7), 1.75 (2H, t,  $J=13.3$  Hz, H19), 1.86-1.92 (2H, m, H2), 2.04 (2H, s, H10'), 2.54 (1H, bdd,  $J_1=4.4$  Hz,  $J_2=13.5$  Hz, H18), 2.97 (2H, dt,  $J_1=4.0$  Hz,  $J_2=13.8$  Hz,  $J_3=13.8$  Hz, H11), 3.27-3.32 (2H, m, H1'), 3.27-3.40 (2H, m, H8'), 3.49-3.54 (2H, m, H1'), 3.59-3.70 (2H, m, H6'), 3.59-3.70 (2H, m, H7'), 3.59-3.70 (2H,

m, H5'), 3.59-3.70 (2H, m, H3'), 3.59-3.70 (2H, m, H4'), 3.59-3.70 (2H, m, H2'), 4.49 (1H, dd,  $J_1=5.2$  Hz,  $J_2=10.9$  Hz, H3), 5.36 (1H, t,  $J=3.7$  Hz, H12), 6.33 (2H, bt,  $J=5.1$  Hz, H1'-NH).

**$^{13}\text{C}$  NMR:**  $\delta$  15.43 (q, C24), 16.64 (q, C25), 16.86 (q, C26), 23.48 (t, C16), 23.53 (t, C11), 23.59 (t, C2), 23.67 (q, C30), 25.68 (q, C27), 27.28 (t, C15), 27.99 (q, C23), 28.15 (t, C6), 30.71 (s, C20), 32.32 (t, C22), 32.55 (t, C7), 32.99 (q, C29), 34.11 (t, C21), 36.82 (s, C10), 37.66 (s, C4), 38.14 (t, C1), 39.04 (t, C1'), 39.38 (s, C8), 41.97 (s, C14), 42.14 (d, C18), 46.34 (s, C17), 46.66 (t, C19), 47.45 (d, C9), 50.65 (t, C8'), 55.16 (d, C5), 69.68 (t, C7'), 70.09 (t, C6'), 70.28 (t, C5'), 70.62 (t, C4'), 70.65 (t, C3'), 70.72 (t, C2'), 80.81 (d, C3), 122.65 (d, C12), 144.62 (s, C13), 178.14 (s, C28).

**MS (ES):**  $m/z = 699.4$   $[\text{M}+\text{H}]^+$ ;  $697.3$   $[\text{M}-\text{H}]^-$

1.5. Benzyl (3 $\beta$ )-3-{[1-(2-{2-[2-(2-{[(3 $\beta$ )-3-(acetyloxy)-28-oxoolean-12-en-28-yl]amino}-ethoxy]ethoxy]ethoxy}ethyl)-1*H*-1,2,3-triazol-4-yl]methoxy}olean-12-en-28-oate (**6a**)

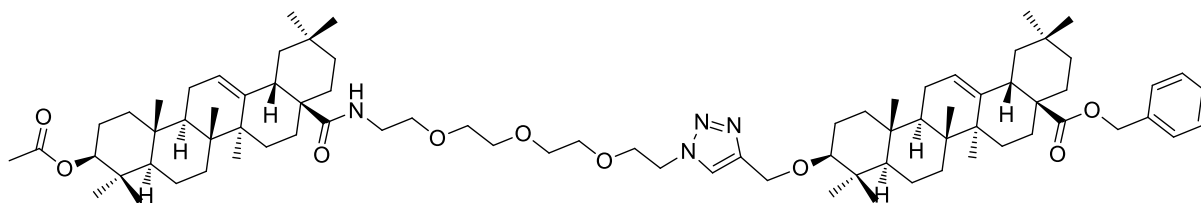

Procedure F was applied, using **4a** and **5a** as the starting compounds, yielding **6a** in a 99 % yield.

**$^1\text{H}$  NMR:**  $\delta$  0.61 (3H, s, H30), 0.62 (3H, d,  $J=0.4$  Hz, H26), 0.62 (3H, d,  $J=0.4$  Hz, H26''), 0.71 (1H, dd,  $J_1=2.0$  Hz,  $J_2=11.6$  Hz, H5''), 0.78 (3H, s, H25''), 0.85 (1H, dd,  $J_1=1.9$  Hz,  $J_2=11.5$  Hz, H5), 0.86 (3H, s, H25), 0.87 (3H, s, H23), 0.89 (3H, s, H24''), 0.90 (3H, s, H29), 0.91 (3H, s, H23''), 0.91 (3H, s, H29''), 0.92 (3H, s, H30''), 0.94 (3H, d,  $J=0.7$  Hz, H24), 1.12 (3H, d,  $J=0.6$  Hz, H27''), 1.16 (3H, d,  $J=0.6$  Hz, H27), 1.77 (2H, t,  $J=13.3$  Hz, H19), 1.98 (2H, dt,  $J_1=3.8$  Hz,  $J_2=13.6$  Hz,  $J_3=13.6$  Hz, H11), 2.04 (3H, s, OAc), 2.55 (1H, bdd,  $J_1=4.0$  Hz,  $J_2=13.1$  Hz, H18), 2.91 (1H, bdd,  $J_1=4.5$  Hz,  $J_2=13.6$  Hz, H18''), 2.98 (1H, dd,  $J_1=4.4$  Hz,  $J_2=11.7$  Hz, H3''), 3.25-3.31 (2H, m, H1'), 3.50-3.54 (2H, m, H1'), 3.56-3.62 (2H, m, H6'), 3.56-3.62 (2H, m, H5'), 3.56-3.62 (2H, m, H4'), 3.56-3.62 (2H, m, H2'), 3.56-3.62 (2H, m, H3'), 3.86-3.89 (2H, m, H7'), 4.50-4.54 (2H, m, H8'), 4.56 (1H, dd,  $J_1=5.4$  Hz,  $J_2=11.2$  Hz, H3), 4.56 (2H, dd,  $J_1=0.6$  Hz,  $J_2=12.4$

Hz, H11'), 4.76 (2H, dd,  $J_1=0.7$  Hz,  $J_2=12.4$  Hz, H11'), 5.05 (2H, d,  $J=12.5$  Hz, H1'''), 5.09 (2H, d,  $J=12.5$  Hz, H1'''), 5.28 (1H, t,  $J=3.9$  Hz, H12''), 5.35 (1H, t,  $J=3.6$  Hz, H12), 7.28-7.36 (2H, m, H5'''), 7.28-7.36 (1H, m, H3'''), 7.28-7.36 (1H, m, H4'''), 7.65 (1H, s, H9').

**$^{13}\text{C}$  NMR:**  $\delta$  15.34 (q, C24''), 15.48 (q, C24), 16.52 (q, C25''), 16.98 (q, C26), 16.99 (q, C26''), 18.25 (t, C6), 18.34 (t, C6''), 21.22 (q, OAc), 22.80 (t, C16''), 23.16 (t, C16), 23.49 (t, C11), 23.58 (t, C11''), 23.62 (t, C2), 23.67 (q, C30), 23.67 (t, C2''), 23.81 (q, C30''), 24.74 (q, C27), 25.90 (q, C27''), 27.41 (t, C15), 27.71 (t, C15''), 28.07 (q, C23), 28.22 (q, C23''), 30.71 (s, C20), 30.74 (s, C20''), 32.46 (t, C22), 32.49 (t, C22''), 32.75 (t, C7), 32.84 (t, C7''), 33.01 (q, C29), 33.10 (q, C29''), 33.96 (t, C21''), 34.23 (t, C21), 36.96 (s, C10), 37.05 (s, C10''), 37.75 (s, C4), 38.30 (t, C1), 38.41 (t, C1''), 38.78 (s, C4''), 39.15 (t, C1'), 39.46 (s, C8), 39.52 (s, C8''), 41.50 (d, C18''), 41.78 (s, C14''), 42.11 (s, C14), 42.30 (d, C18), 45.98 (s, C17''), 46.44 (s, C17), 46.69 (q, C25), 46.78 (t, C19), 46.83 (t, C19''), 47.58 (d, C9), 47.68 (d, C9''), 50.38 (t, C8'), 55.32 (d, C5), 55.73 (d, C5''), 63.17 (t, C11'), 65.93 (t, C1'''), 69.61 (t, C7'), 69.82 (t, C6'), 70.31 (t, C5'), 70.56 (t, C4'), 70.67 (t, C3'), 70.69 (t, C2'), 80.86 (d, C3), 86.63 (d, C3''), 122.59 (d, C12''), 122.66 (d, C12), 123.37 (d, C9'), 123.54 (s, C2'''), 127.89 (d, C5'''), 128.00 (d, C3'''), 128.40 (d, C4'''), 143.74 (s, C13''), 144.79 (s, C13), 146.31 (s, C10'), 170.87 (s, OAc), 177.40 (s, C28''), 178.05 (s, C28).

**MS (ES):**  $m/z$  = 1283.9  $[\text{M}+\text{H}]^+$ ; 1282.4  $[\text{M}-\text{H}]^-$

1.6. (3 $\beta$ )-3-[[1-(2-{2-[2-(2-{[(3 $\beta$ )-3-(Acetyloxy)-28-oxoolean-12-en-28-yl]amino}ethoxy)-ethoxy]ethoxy}ethyl)-1*H*-1,2,3-triazol-4-yl]methoxy}olean-12-en-28-oic acid (**7a**)

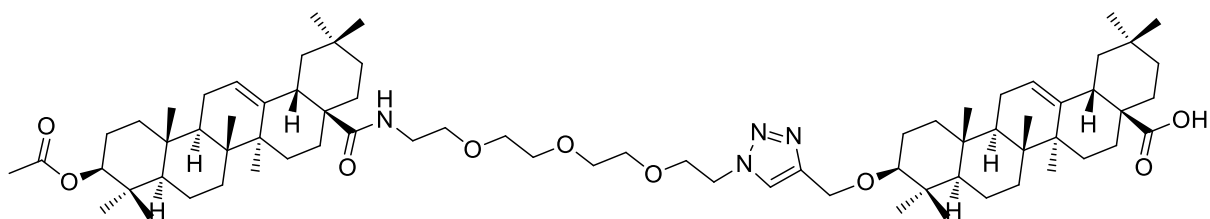

Procedure G was applied, using **6a** as the starting compound, yielding **7a** in a 91 % yield.

**$^1\text{H}$  NMR:**  $\delta$  0.72 (1H, dd,  $J_1=1.8$  Hz,  $J_2=11.4$  Hz, H5''), 0.74 (3H, s, H26''), 0.76 (3H, s, H26), 0.77 (3H, s, H25), 0.83 (1H, dd,  $J_1=1.8$  Hz,  $J_2=11.6$  Hz, H5), 0.86 (3H, s, H25''), 0.86 (3H, s,

H23"), 0.89 (3H, s, H30), 0.89 (3H, s, H23), 0.90 (3H, s, H29"), 0.90 (3H, s, H29), 0.90 (3H, s, H30"), 0.91 (3H, s, H24"), 0.92 (3H, dd,  $J=0.5$  Hz, H24), 1.12 (3H, s, H27"), 1.15 (3H, s, H27), 1.97 (2H, tt,  $J_1=3.8$  Hz,  $J_2=3.8$  Hz,  $J_3=11.8$  Hz,  $J_4=11.8$  Hz, H11), 2.05 (3H, s, OAc), 2.53 (1H, bdd,  $J_1=4.1$  Hz,  $J_2=13.0$  Hz, H18), 2.82 (1H, bdd,  $J_1=4.7$  Hz,  $J_2=13.8$  Hz, H18"), 2.98 (1H, dd,  $J_1=4.7$  Hz,  $J_2=13.8$  Hz, H3"), 3.25-3.31 (2H, m, H1'), 3.49-3.54 (2H, m, H1'), 3.57-3.62 (2H, m, H6'), 3.57-3.62 (2H, m, H3'), 3.57-3.62 (2H, m, H4'), 3.57-3.62 (2H, m, H2'), 3.57-3.62 (2H, m, H5'), 3.86-3.89 (2H, m, H7'), 4.49 (1H, dd,  $J_1=5.1$  Hz,  $J_2=11.0$  Hz, H3), 4.52-4.55 (2H, m, H8'), 4.57 (2H, dd,  $J_1=0.5$  Hz,  $J_2=12.5$  Hz, H11'), 4.77 (2H, dd,  $J_1=0.5$  Hz,  $J_2=12.5$  Hz, H11'), 5.28 (1H, tt,  $J=3.8$  Hz, H12"), 5.35 (1H, tt,  $J=3.7$  Hz, H12), 7.69 (1H, s, H9').

**$^{13}\text{C}$  NMR:**  $\delta$  12.61 (q, C30), 15.33 (q, C24"), 15.44 (q, C24), 16.48 (q, C25"), 16.66 (q, C25), 17.06 (q, C26"), 18.15 (d, C6), 18.23 (t, C6"), 22.67 (d, C16), 22.67 (q, C26), 22.92 (t, C16"), 23.40 (t, C11"), 23.47 (s, C11), 23.54 (t, C2"), 23.56 (q, C30"), 23.69 (t, C2), 25.69 (q, C27), 25.90 (q, C27"), 27.28 (t, C15"), 27.64 (t, C15), 27.99 (q, C23"), 28.12 (q, C23), 30.66 (s, C20"), 30.71 (s, C20), 32.31 (t, C7), 32.41 (t, C7"), 32.57 (t, C22"), 32.60 (t, C22), 32.99 (q, C29), 33.05 (q, C29"), 33.78 (t, C21"), 34.10 (t, C21), 36.82 (s, C10"), 36.99 (d, C10), 37.65 (s, C4), 38.16 (t, C1"), 38.19 (t, C1), 38.68 (s, C4"), 39.02 (t, C1'), 39.27 (s, C8"), 39.38 (t, C8), 41.01 (d, C18"), 41.59 (s, C14"), 41.98 (s, C14), 42.16 (d, C18), 45.85 (t, C19), 46.34 (s, C17"), 46.45 (t, C19"), 46.65 (s, C17), 47.44 (d, C9"), 48.55 (s, C9), 50.43 (t, C8'), 55.15 (d, C5), 55.56 (d, C5"), 62.90 (t, C11'), 69.48 (t, C7'), 69.71 (t, C6'), 70.22 (t, C5'), 70.46 (t, C4'), 70.57 (t, C2'), 70.57 (t, C3'), 80.83 (d, C3), 86.50 (d, C3"), 122.56 (d, C12"), 122.57 (t, C12), 123.65 (d, C9"), 143.59 (s, C13"), 144.69 (d, C13), 145.99 (s, C10'), 178.14 (s, C28), 182.29 (s, C28").

**MS (ES):**  $m/z$  = 1215.6  $[\text{M}+\text{H}]^+$ ; 1192.0  $[\text{M}-\text{H}]^-$

1.7. (3 $\beta$ )-3-[[1-(2-{2-[2-(2-{[(3 $\beta$ )-3-Hydroxy-28-oxoolean-12-en-28-yl]amino}ethoxy)-ethoxy]ethoxy}ethyl)-1H-1,2,3-triazol-4-yl]methoxy}olean-12-en-28-oic acid (**8a**)

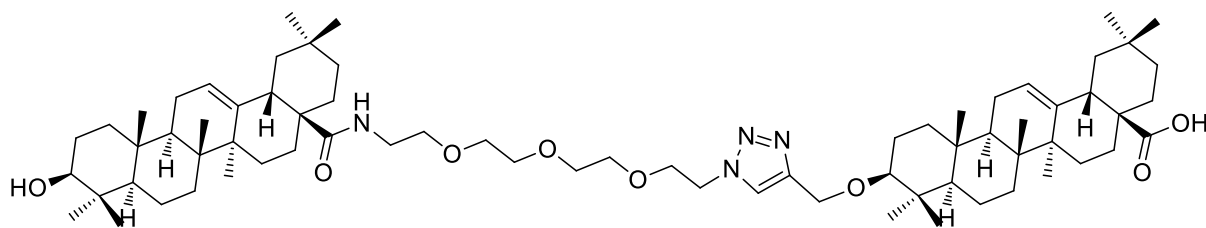

Procedure H was applied, using **7a** as the starting compound, yielding **8a** in a 95 % yield.

**<sup>1</sup>H NMR:** δ 0.73 (1H, dd,  $J_1=1.8$  Hz,  $J_2=11.7$  Hz, H5"), 0.73 (1H, dd,  $J_1=1.8$  Hz,  $J_2=11.7$  Hz, H5), 0.74 (3H, s, H26"), 0.76 (3H, s, H25"), 0.77 (3H, s, H25), 0.77 (3H, s, H26), 0.89 (3H, s, H30), 0.89 (3H, s, H29"), 0.89 (3H, s, H30"), 0.90 (3H, s, H29), 0.91 (3H, s, H24"), 0.92 (3H, s,  $J=0.5$  Hz, H24), 0.98 (3H, s, H23), 0.98 (3H, s, H23"), 1.12 (3H, s, H27"), 1.15 (3H, s, H27), 1.97 (2H, dt,  $J_1=3.8$  Hz,  $J_2=13.6$  Hz,  $J_3=13.6$  Hz, H11"), 1.97 (2H, dt,  $J_1=3.8$  Hz,  $J_2=23.6$  Hz,  $J_3=13.6$  Hz,  $J_4=11.8$  Hz, H11), 2.53 (1H, bdd,  $J_1=4.7$  Hz,  $J_2=13.6$  Hz, H18), 2.82 (1H, bdd,  $J_1=4.7$  Hz,  $J_2=12.2$  Hz, H18"), 2.98 (1H, dd,  $J_1=4.2$  Hz,  $J_2=11.7$  Hz, H3"), 3.22 (1H, dd,  $J_1=4.6$  Hz,  $J_2=11.5$  Hz, H3), 3.28-3.32 (2H, m, H1'), 3.48-3.51 (2H, m, H1'), 3.48-3.62 (2H, m, H5'), 3.48-3.62 (2H, m, H2'), 3.48-3.62 (2H, m, H6'), 3.48-3.62 (2H, m, H4'), 3.48-3.62 (2H, m, H3'), 3.87 (2H, t,  $J=5.3$  Hz, H7'), 4.54 (2H, t,  $J=5.3$  Hz, H8'), 4.57 (2H, d,  $J_1=12.5$  Hz,  $J_2=12.5$  Hz, H11'), 4.77 (2H, d,  $J_1=12.5$  Hz,  $J_2=12.5$  Hz, H11'), 5.28 (1H, t,  $J_1=3.8$  Hz,  $J_2=3.8$  Hz, H12"), 5.35 (1H, t,  $J=3.8$  Hz, H12), 7.69 (1H, s, H9').

**<sup>13</sup>C NMR:** δ 14.45 (q, C25"), 15.34 (q, C24"), 15.39 (q, C24), 15.59 (q, C26), 16.87 (q, C25), 17.11 (q, C26"), 18.23 (t, C6), 18.27 (t, C6"), 22.68 (t, C16), 22.93 (t, C16"), 23.40 (t, C11"), 23.54 (t, C11), 23.57 (t, C2"), 23.62 (q, C30"), 23.69 (q, C30), 25.74 (q, C27), 25.90 (q, C27"), 27.08 (t, C2), 27.30 (t, C15"), 27.65 (t, C15), 28.07 (q, C23"), 28.14 (q, C23), 30.66 (s, C20"), 30.72 (s, C20), 32.37 (t, C7), 32.41 (t, C7"), 32.57 (t, C22"), 32.66 (t, C22), 33.00 (q, C29), 33.06 (q, C29"), 33.78 (t, C21"), 34.11 (t, C21), 36.93 (s, C10"), 36.99 (s, C10), 38.18 (s, C4), 38.48 (t, C1), 38.69 (t, C1"), 38.73 (s, C4"), 39.03 (t, C1'), 39.28 (s, C8"), 39.37 (s, C8), 41.04 (d, C18"), 41.60 (s, C14"), 42.00 (s, C14), 42.16 (d, C18), 45.84 (t, C19), 46.35 (s, C17"), 46.44 (t, C19"), 46.71 (s, C17), 47.50 (d, C9"), 47.54 (d, C9), 50.55 (t, C8'), 55.06 (d, C5), 55.55 (d, C5"), 62.82 (t, C11'), 69.43 (t, C7'), 69.72 (t, C6'), 70.21 (t, C5'), 70.45 (t, C4'), 70.57 (t, C2'), 70.57 (t, C3'), 78.95 (d, C3), 86.59 (d, C3"), 122.58 (d, C12), 122.68 (d, C12"), 123.82 (d, C9'), 143.59 (s, C13"), 144.70 (s, C13), 145.89 (s, C10'), 178.17 (s, C28), 182.02 (s, C28").

**MS (ES):**  $m/z$  = 1151.6  $[M+H]^+$ ; 1149.9  $[M-H]^-$



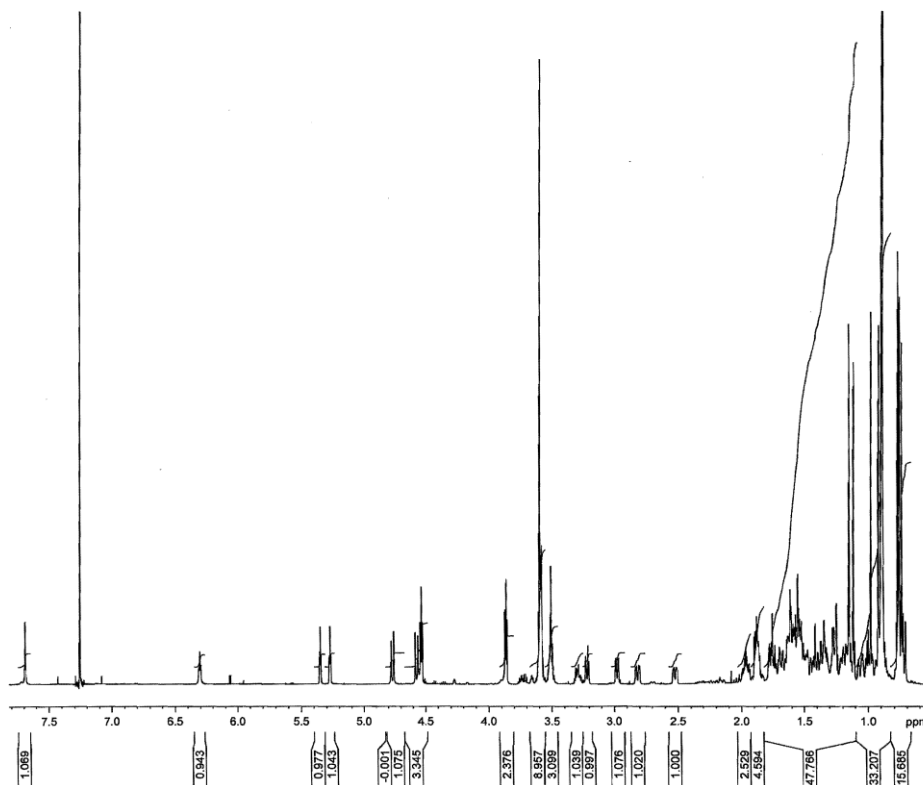

Z.Wimmer MC-30  
in CDCl<sub>3</sub>, rfp=7.26 ppm  
7.5.2019 DA

Current Data Parameters  
NAME Wimmer-MC30  
EXPNO 1  
PROCNO 1

F2 - Acquisition Parameters  
Date 20190507  
Time 12.44  
INSTRUM spect  
PROBHD 5 mm CPTCI 1H-  
PULPROG zg30  
TD 43288  
SOLVENT CDCl<sub>3</sub>  
NS 32  
DS 0  
SWH 5411.255 Hz  
FIDRES 0.125006 Hz  
AQ 3.9998112 sec  
RG 61.26  
DW 92.400 usec  
DE 20.00 usec  
TE 298.1 K  
D1 0 sec  
TD0 1

===== CHANNEL f1 =====  
SFO1 600.1325205 MHz  
NUC1 1H  
P1 9.00 usec  
PLW1 6.00000000 W

F2 - Processing parameters  
SI 131072  
SF 600.1300150 MHz  
WDW no  
SSB 0  
LB 0 Hz  
GB 0  
PC 1.00

**57516**

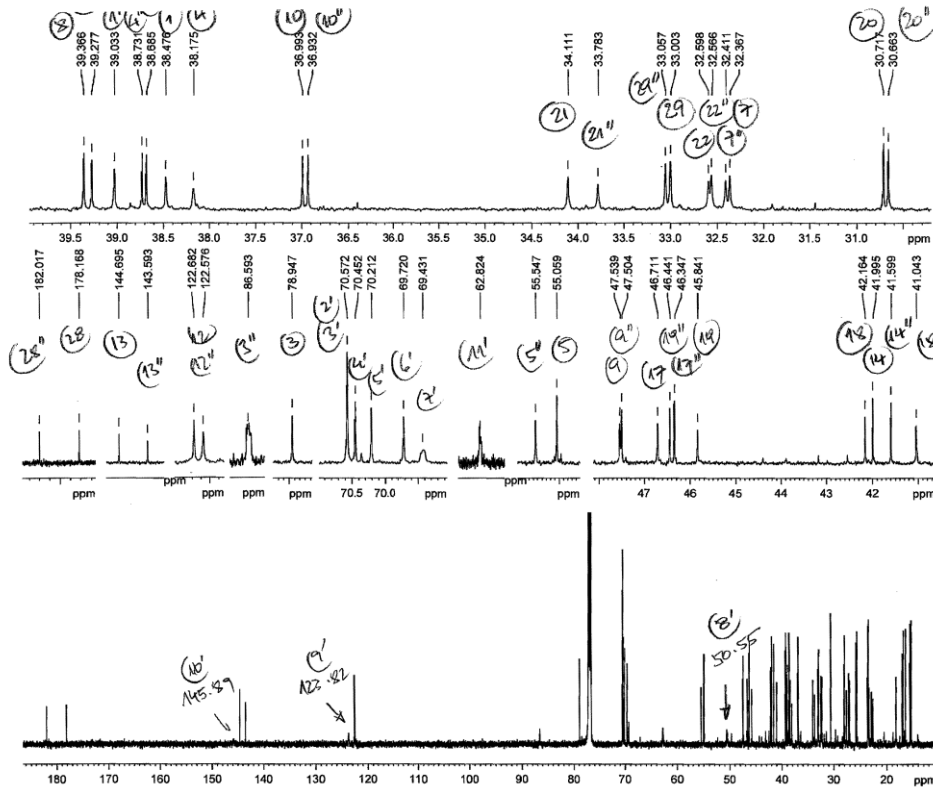

Z.Wimmer MC-30  
in CDCl<sub>3</sub>, rfp=7.26 ppm  
7.5.2019 DA

Current Data Parameters  
NAME Wimmer-MC30  
EXPNO 2  
PROCNO 1

F2 - Acquisition Parameters  
Date 20190507  
Time 14.24  
INSTRUM spect  
PROBHD 5 mm CPTCI 1H-  
PULPROG zgpg30  
TD 59520  
SOLVENT CDCl<sub>3</sub>  
NS 3833  
DS 0  
SWH 29761.904 Hz  
FIDRES 0.500032 Hz  
AQ 0.9999360 sec  
RG 196.16  
DW 16.800 usec  
DE 18.00 usec  
TE 298.2 K  
D1 1.00000000 sec  
D11 0.03000000 sec  
TD0 1

===== CHANNEL f1 =====  
SFO1 150.9178993 MHz  
NUC1 13C  
P1 12.00 usec  
PLW1 80.00000000 W

===== CHANNEL f2 =====  
SFO2 600.1324005 MHz  
NUC2 1H  
CPDPRG2 waltz16  
PCPD2 70.00 usec  
PLW2 6.00000000 W  
PLW12 0.09918400 W  
PLW13 0.04860000 W

F2 - Processing parameters  
SI 131072  
SF 150.9028131 MHz  
WDW EM  
SSB 0  
LB 1.00 Hz  
GB 0

**57516**

1.8. (3 $\beta$ )-28-[(2-{2-[2-(2-{4-[(3 $\beta$ )-28-[(2-{2-[2-(2-Azidoethoxy)ethoxy]ethoxy}ethyl)-amino]-28-oxoolean-12-en-3-yl}oxy)methyl]-1*H*-1,2,3-triazol-1-yl}ethoxy)ethoxy]ethoxy}-ethyl)amino]-28-oxoolean-12-en-3-yl acetate (**9a**)

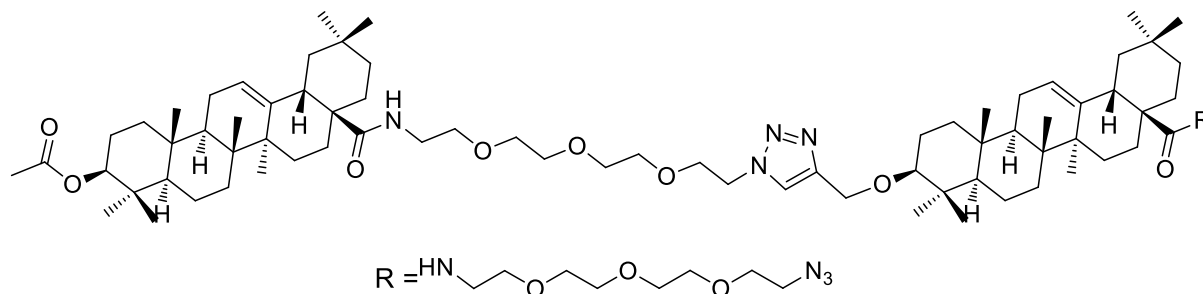

Procedure E was applied, using **8a** as the starting compound, yielding **9a** in a 90 % yield.

**<sup>1</sup>H NMR:**  $\delta$  0.72 (1H, dd,  $J_1=1.9$  Hz,  $J_2=11.6$  Hz, H5''), 0.76 (3H, s, H26), 0.76 (3H, s, H26''), 0.78 (3H, s, H25), 0.83 (1H, dd,  $J_1=1.8$  Hz,  $J_2=11.7$  Hz, H5), 0.85 (3H, s, H25''), 0.86 (3H, s, H23), 0.89 (3H, s, H23''), 0.89 (3H, s, H30), 0.89 (3H, s, H30''), 0.90 (3H, s, H24''), 0.90 (3H, s, H29), 0.91 (3H, s, H29''), 0.92 (3H, d,  $J=0.5$  Hz, H24), 1.12 (3H, d,  $J=0.6$  Hz, H27), 1.14 (3H, d,  $J=0.6$  Hz, H27''), 1.68 (2H, ddt,  $J_1=2.8$  Hz,  $J_2=2.8$  Hz,  $J_3=4.1$  Hz,  $J_4=14.3$  Hz, H22), 1.76 (2H, t,  $J=13.3$  Hz, H19), 1.97 (2H, tt,  $J_1=3.8$  Hz,  $J_2=3.8$  Hz,  $J_3=13.8$  Hz,  $J_4=13.8$  Hz, H11), 2.53 (1H, bdd,  $J_1=34.0$  Hz,  $J_2=13.3$  Hz, H18), 2.53 (1H, bdd,  $J_1=4.0$  Hz,  $J_2=13.3$  Hz, H18''), 2.99 (1H, dd,  $J_1=4.3$  Hz,  $J_2=11.7$  Hz, H3''), 3.25-3.32 (2H, m, H1\*), 3.26-3.32 (2H, m, H1'), 3.37-3.40 (2H, m, H8\*), 3.48-3.54 (2H, m, H1'), 3.48-3.54 (2H, m, H1\*), 3.57-3.69 (2H, m, H3\*), 3.57-3.69 (2H, m, H6'), 3.57-3.69 (2H, m, H4'), 3.57-3.69 (2H, m, H4\*), 3.57-3.69 (2H, m, H3'), 3.57-3.69 (2H, m, H2\*), 3.57-3.69 (2H, m, H2'), 3.57-3.69 (2H, m, H5'), 3.57-3.69 (2H, m, H6\*), 3.57-3.69 (2H, m, H5\*), 3.85-3.89 (2H, m, H7'), 3.85-3.89 (2H, m, H7\*), 4.49 (1H, dd,  $J_1=5.1$  Hz,  $J_2=10.6$  Hz, H3), 4.52-4.55 (2H, m, H8'), 4.56 (2H, dd,  $J_1=0.6$  Hz,  $J_2=12.5$  Hz, H11'), 4.77 (2H, dd,  $J_1=0.6$  Hz,  $J_2=12.5$  Hz, H11''), 5.35 (1H, t,  $J=3.6$  Hz, H12), 5.36 (1H, t,  $J=3.7$  Hz, H12''), 6.29 (1H, t,  $J=0.0$  Hz, H1\*-NH), 6.32 (1H, t,  $J=5.5$  Hz, H1'-NH), 7.68 (1H, s, H9').

**<sup>13</sup>C NMR:**  $\delta$  15.41 (q, C24''), 15.45 (q, C24), 16.47 (q, C25''), 16.66 (q, C25), 16.89 (q, C26), 16.89 (q, C26''), 18.15 (t, C6), 18.22 (t, C6''), 22.61 (t, C16''), 22.61 (t, C16), 23.48 (t, C11''), 23.54 (t, C11), 23.57 (t, C2''), 23.60 (q, C30), 23.69 (t, C2), 25.69 (q, C27''), 25.73 (q, C27), 27.28 (t, C15''), 27.30 (t, C15), 28.00 (q, C23''), 28.09 (q, C23), 30.72 (s, C20''), 30.72 (s, C20),

32.31 (t, C7), 32.31 (t, C7''), 32.59 (t, C22''), 32.59 (t, C22), 32.61 (q, C30''), 32.99 (q, C29''), 33.00 (q, C29), 34.11 (t, C21''), 34.13 (t, C21), 36.83 (s, C10''), 36.89 (s, C10), 37.66 (s, C4), 38.15 (t, C1''), 38.28 (t, C1), 38.67 (s, C4''), 39.03 (t, C1\*), 39.03 (t, C1'), 39.38 (s, C8''), 39.41 (s, C8), 41.98 (s, C14), 41.98 (s, C14''), 42.15 (d, C18), 42.15 (d, C18''), 46.34 (t, C19''), 46.34 (t, C19), 46.66 (s, C17''), 46.69 (s, C17), 47.44 (d, C9''), 47.48 (d, C9), 50.66 (t, C8\*), 50.66 (t, C8'), 55.16 (d, C5), 55.46 (d, C5''), 62.88 (t, C11'), 69.48 (t, C7'), 69.69 (t, C7\*), 69.73 (t, C6'), 70.22 (t, C5'), 70.29 (t, C6\*), 70.46 (t, C4'), 70.58 (t, C3'), 70.58 (t, C2'), 70.63 (t, C5\*), 70.66 (t, C4\*), 70.69 (t, C3\*), 70.73 (t, C2\*), 80.77 (d, C3), 86.40 (d, C3''), 122.59 (d, C12''), 122.74 (d, C12), 123.65 (d, C9'), 125.96 (s, C10'), 144.62 (s, C13''), 144.71 (s, C13), 178.10 (s, C28''), 178.13 (s, C28).

**MS (ES):**  $m/z$  = 1394.3  $[M+H]^+$ ; 1392.2  $[M-H]^-$

1.9. Benzyl (3 $\beta$ )-3-{[1-(2-{2-[2-(2-{[(3 $\beta$ )-3-{[1-(2-{2-[2-(2-{[(3 $\beta$ )-3-(acetyloxy)-28-oxoolean-12-en-28-yl]amino}ethoxy)ethoxy]ethoxy}ethyl)-1*H*-1,2,3-triazol-4-yl]methoxy}-28-oxoolean-12-en-28-yl]amino}ethoxy)ethoxy]ethoxy}ethyl)-1*H*-1,2,3-triazol-4-yl]methoxy}olean-12-en-28-oate (**10a**)

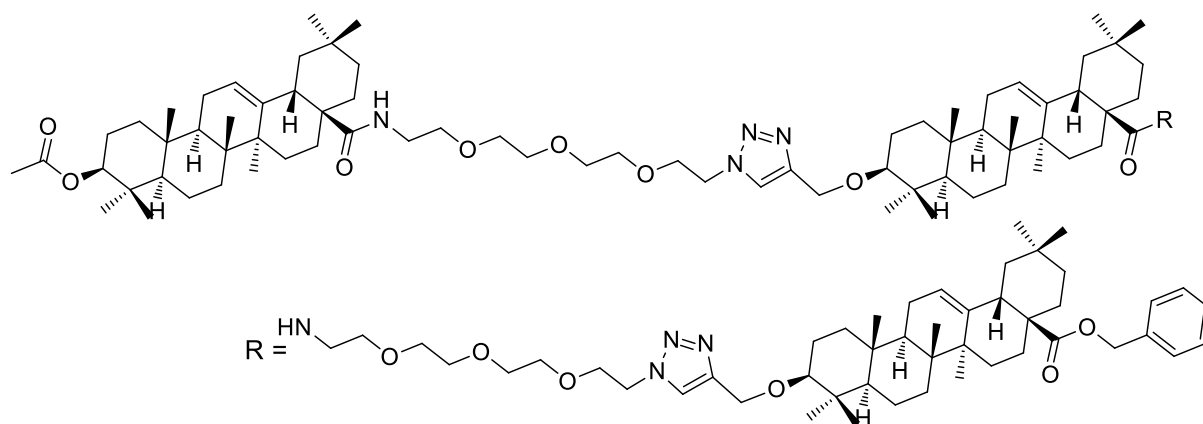

Procedure F was applied, using **9a** and **3a** as the starting compounds, yielding **10a** in a 97 % yield.

**<sup>1</sup>H NMR:**  $\delta$  0.59 (s, H24), 0.70 (dd,  $J_1=1.7$  Hz,  $J_2=10.7$  Hz, H5), 0.72 (dd,  $J_1=1.8$  Hz,  $J_2=11.4$  Hz, H5\*), 0.75 (s, H26), 0.76 (s, H26''), 0.77 (s, H25\*), 0.77 (s, H25''), 0.77 (s, H26\*), 0.83 (dd,  $J_1=1.8$  Hz,  $J_2=11.6$  Hz, H5''), 0.84 (s, H29), 0.84 (s, H23), 0.86 (s, H25), 0.87 (s, H30), 0.88 (s, H29''), 0.90 (s, H24''), 0.90 (s, H24\*), 0.90 (s, H30''), 0.90 (s, H29\*), 0.91 (s, H30\*), 0.91 (s,

H23"), 0.92 (s, H23\*), 1.11 (s, H27), 1.14 (s, H27"), 1.15 (s, H27\*), 2.04 (s, OAc), 2.53 (bdd,  $J_1=4.2$  Hz,  $J_2=14.0$  Hz, H18"), 2.53 (bdd,  $J_1=4.2$  Hz,  $J_2=14.0$  Hz, H18\*), 2.70 (dt,  $J_1=3.3$  Hz,  $J_2=3.3$  Hz,  $J_3=13.6$  Hz, H15\*), 2.89 (bdd,  $J_1=5.0$  Hz,  $J_2=14.1$  Hz, H18), 2.97 (dd,  $J_1=4.4$  Hz,  $J_2=10.7$  Hz, H3"), 2.99 (dd,  $J_1=4.2$  Hz,  $J_2=10.7$  Hz, H3\*), 4.50 (dd,  $J_1=4.5$  Hz,  $J_2=10.5$  Hz, H3), 5.04 (d,  $J=12.5$  Hz, HCH2-HPh), 5.08 (d,  $J=12.5$  Hz, HCH2-HPh), 5.28 (t,  $J=3.8$  Hz, H12\*), 5.35 (t,  $J=3.5$  Hz, H12), 5.35 (t,  $J=3.7$  Hz, H12"), 7.26-7.40 (m, HCH2-HPh), 7.72 (s, H9'), 7.73 (s, H9'').

**$^{13}\text{C}$  NMR:**  $\delta$  15.30 (C24\*), 15.40 (C25), 15.50 (C24"), 16.50 (C25"), 16.50 (C25\*), 16.70 (C24), 16.90 (C26), 16.90 (C26\*), 16.90 (C26"), 18.20 (C6), 18.20 (C6"), 18.20 (C6\*), 20.60 (OAc), 22.60 (C16\*), 22.70 (C16"), 23.00 (C11\*), 23.40 (C11"), 23.40 (C2\*), 23.50 (C16), 23.50 (C2"), 23.60 (C2), 23.60 (C30\*), 23.60 (C11), 23.60 (C30"), 23.70 (C30), 25.70 (C27), 25.70 (C27"), 25.90 (C27\*), 28.00 (C15\*), 28.00 (C23"), 28.00 (C15"), 28.10 (C15), 28.10 (C23), 28.40 (C23\*), 30.70 (C20"), 30.70 (C20), 30.70 (C20\*), 32.30 (C22"), 32.40 (C22\*), 32.60 (C7"), 32.60 (C7), 32.70 (C7\*), 33.00 (C22), 33.10 (C29), 33.10 (C29"), 33.20 (C29\*), 33.80 (C21\*), 33.90 (C21"), 34.10 (C21), 36.80 (C10), 36.80 (C14), 36.90 (C4), 36.90 (C10\*), 36.90 (C10"), 38.10 (C1\*), 38.20 (C1"), 38.30 (C1), 38.70 (C4"), 38.70 (C4\*), 39.20 (C8"), 39.30 (C8\*), 39.40 (C12), 39.40 (C8), 39.40 (C1''), 39.80 (C1'), 41.40 (C18\*), 41.70 (C14"), 41.70 (C18"), 42.00 (C18), 42.00 (C14\*), 45.80 (C19\*), 46.30 (C19), 46.30 (C17\*), 46.30 (C17"), 46.30 (C19"), 46.70 (C17), 47.40 (C13), 47.40 (C9), 47.40 (C9"), 47.50 (C9\*), 52.00 (C8'''), 52.40 (C8'), 55.20 (C5\*), 55.40 (C5), 55.50 (C5"), 62.70 (C11'), 62.70 (C11''), 65.90 (CCH2-Ph), 69.20 (C7'''), 69.20 (C7'), 69.70 (C6'), 69.70 (C6'''), 70.20 (C5'), 70.20 (C5'''), 70.40 (C4'), 70.40 (C4'''), 70.50 (C3'''), 70.50 (C3'), 70.60 (C2'''), 70.60 (C2'), 80.80 (C3), 86.80 (C3"), 86.90 (C3\*), 122.60 (C12\*), 122.70 (C12"), 124.60 (C9'), 124.80 (C9'''), 127.90 (CCH2-Ph), 127.90 (CCH2-Ph), 128.40 (CCH2-Ph), 136.40 (CCH2-Ph), 143.70 (C13\*), 144.70 (C13"), 144.70 (C10'''), 144.70 (C10'), 171.00 (OAc), 177.50 (C28), 178.20 (C28\*), 178.20 (C28'').

**MS (ES):**  $m/z = 1985.4$  [M-H]<sup>-</sup>

1.10. (3 $\beta$ )-3-[[1-(2-{2-[2-(2-{[(3 $\beta$ )-3-{[1-(2-{2-[2-(2-{[(3 $\beta$ )-3-(Acetyloxy)-28-oxoolean-12-en-28-yl]amino}ethoxy)ethoxy]ethoxy}ethyl)-1*H*-1,2,3-triazol-4-yl]methoxy}-28-oxoolean-12-en-28-yl]amino}ethoxy)ethoxy]ethoxy}ethyl)-1*H*-1,2,3-triazol-4-yl]methoxy}olean-12-en-28-oic acid (**11a**)

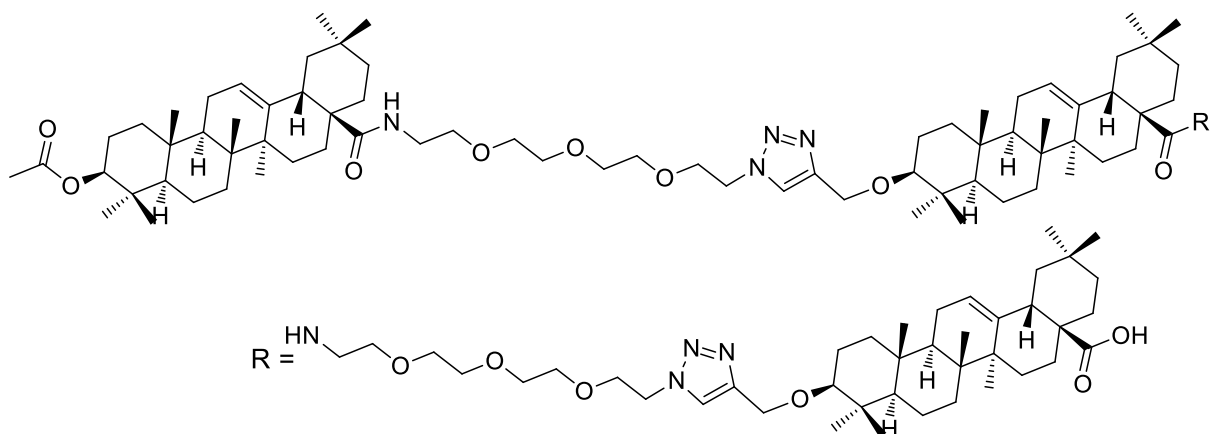

Procedure G was applied, using **10a** as the starting compound, yielding **11a** in a 99 % yield.

**<sup>1</sup>H NMR:**  $\delta$  0.72 (dd,  $J_1=1.8$  Hz,  $J_2=11.4$  Hz, H5\*), 0.75 (s, H26"), 0.75 (s, H26), 0.76 (s, H26\*), 0.76 (dd,  $J_1=1.7$  Hz,  $J_2=10.7$  Hz, H5), 0.77 (s, H24), 0.78 (s, H25\*), 0.78 (s, H25"), 0.79 (s, H23), 0.83 (dd,  $J_1=1.8$  Hz,  $J_2=11.6$  Hz, H5"), 0.85 (s, H29), 0.86 (s, H25), 0.87 (s, H30), 0.89 (s, H29"), 0.90 (s, H29\*), 0.90 (s, H24"), 0.90 (s, H30"), 0.91 (s, H23"), 0.91 (s, H30\*), 0.91 (s, H24\*), 0.92 (s, H23\*), 1.10 (s, H27), 1.15 (s, H27\*), 1.15 (s, H27"), 2.04 (s, OAc), 2.50 (bdd,  $J_1=4.2$  Hz,  $J_2=14.0$  Hz, H18"), 2.53 (bdd,  $J_1=4.2$  Hz,  $J_2=14.0$  Hz,  $J_3=13.6$  Hz, H18\*), 2.84 (bdd,  $J_1=5.0$  Hz,  $J_2=14.1$  Hz, H18), 2.97 (dd,  $J_1=4.4$  Hz,  $J_2=10.7$  Hz, H3"), 2.99 (dd,  $J_1=4.2$  Hz,  $J_2=10.7$  Hz, H3\*), 4.48 (dd,  $J_1=4.5$  Hz,  $J_2=10.5$  Hz, H3), 5.28 (t,  $J=3.8$  Hz, H12\*), 5.34 (t,  $J=3.7$  Hz, H12"), 5.35 (t,  $J=3.5$  Hz, H12), 7.76 (s, H9"), 7.78 (s, H9").

**<sup>13</sup>C NMR:**  $\delta$  15.40 (C25), 15.40 (C24\*), 15.50 (C24"), 16.50 (C25\*), 16.50 (C25"), 16.70 (C24), 16.90 (C26), 16.90 (C26"), 17.10 (C26\*), 18.20 (C6\*), 18.20 (C6"), 18.30 (C6), 20.60 (OAc), 22.50 (C16\*), 22.70 (C16"), 23.00 (C11\*), 23.40 (C2\*), 23.40 (C11"), 23.50 (C16), 23.50 (C2"), 23.60 (C30"), 23.60 (C11), 23.60 (C2), 23.60 (C30\*), 23.70 (C30), 25.70 (C27), 25.90 (C27\*), 26.30 (C27"), 28.00 (C15), 28.00 (C15\*), 28.00 (C15"), 28.10 (C23"), 28.20 (C23\*), 28.20 (C23), 30.70 (C20), 30.70 (C20\*), 30.90 (C20"), 32.30 (C22"), 32.40 (C22\*), 32.60 (C7"), 32.60 (C7), 32.60 (C7\*), 33.00 (C22), 33.00 (C29), 33.10 (C29\*), 33.20 (C29"), 33.90 (C21\*), 33.90 (C21"), 34.10 (C21), 36.80 (C10), 36.80 (C10"), 36.90 (C4), 37.00 (C10\*), 38.10 (C1\*), 38.20 (C1), 38.20 (C1"), 38.70 (C4\*), 38.80 (C4"), 39.10 (C8"), 39.30 (C8\*), 39.40 (C8), 39.40 (C1""), 39.40 (C1'), 41.10 (C18\*), 41.70 (C14"), 41.70 (C14\*), 41.70 (C18"), 42.00 (C18), 42.00 (C14), 46.00 (C19\*), 46.30 (C19), 46.30 (C17"), 46.30 (C19"), 46.40 (C17\*), 46.60 (C17), 47.40 (C9), 47.40 (C9"), 47.50 (C9\*), 51.50 (C8""), 52.40 (C8'), 54.80 (C5), 55.50 (C5\*), 55.50 (C5"), 61.90 (C11""), 62.10 (C11'), 69.00 (C7""), 69.10 (C7'), 70.20 (C6'), 70.30

(C6'''), 70.30 (C5'), 70.40 (C4'''), 70.40 (C4'), 70.40 (C5'''), 70.60 (C3'), 70.60 (C3'''), 70.70 (C2'), 70.70 (C2'''), 80.80 (C3), 86.90 (C3''), 87.20 (C3\*), 122.30 (C12), 122.60 (C12\*), 122.70 (C12''), 124.70 (C9'), 124.80 (C9'''), 143.80 (C13\*), 144.70 (C13), 144.70 (C13''), 144.90 (C10'''), 144.90 (C10'), 171.00 (OAc), 178.20 (C28), 180.70 (C28\*), 181.70 (C28'').

**MS (ES):**  $m/z = 1889.3$   $[M+H]^+$

1.11. (3 $\beta$ )-3-{[1-(2-{2-[2-(2-{[(3 $\beta$ )-3-{[1-(2-{2-[2-(2-{[(3 $\beta$ )-3-Hydroxy-28-oxoolean-12-en-28-yl]amino}ethoxy)ethoxy]ethoxy}ethyl)-1*H*-1,2,3-triazol-4-yl]methoxy}-28-oxoolean-12-en-28-yl]amino}ethoxy)ethoxy]ethoxy}ethyl)-1*H*-1,2,3-triazol-4-yl]methoxy}olean-12-en-28-oic acid (**12a**)

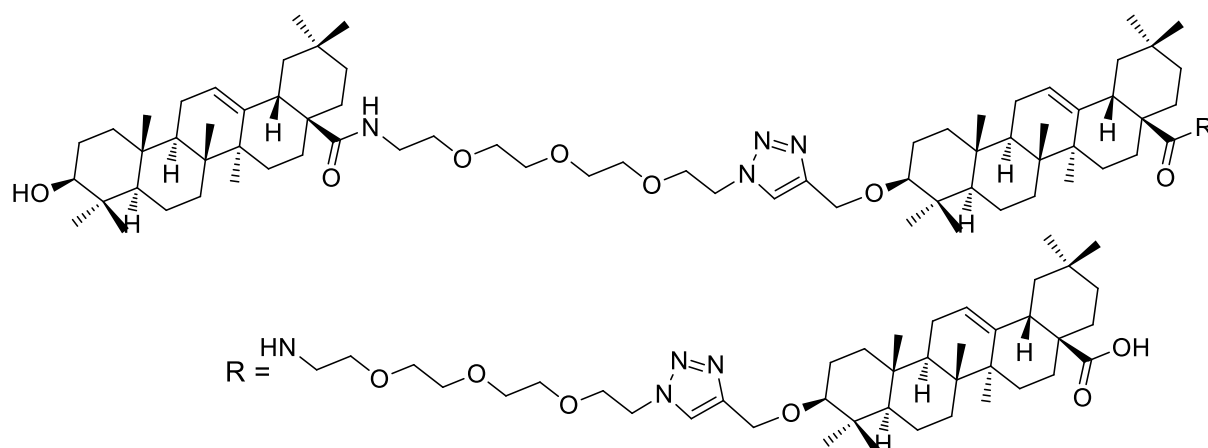

Procedure H was applied, using **11a** as the starting compound, yielding **12a** in an 80 % yield.

**<sup>1</sup>H NMR:**  $\delta$  0.72 (dd,  $J_1=2.0$  Hz,  $J_2=11.8$  Hz, H5), 0.73 (dd,  $J_1=2.0$  Hz,  $J_2=11.8$  Hz, H5\*), 0.75 (s, H26''), 0.75 (s, H26\*), 0.77 (s, H25), 0.77 (s, H26), 0.78 (s, H25''), 0.78 (dd,  $J_1=1.7$  Hz,  $J_2=11.6$  Hz, H5''), 0.78 (s, H25\*), 0.87 (s, H29\*), 0.87 (s, H29''), 0.89 (s, H30), 0.89 (s, H30''), 0.89 (s, H23\*), 0.89 (s, H30\*), 0.90 (s, H24''), 0.90 (s, H29), 0.91 (s, H23''), 0.92 (s, H24\*), 0.92 (s, H24), 0.98 (s, H23), 1.13 (s, H27\*), 1.15 (s, H27), 1.15 (s, H27''), 1.96 (dt,  $J_1=4.0$  Hz,  $J_2=13.6$  Hz,  $J_3=13.6$  Hz, H11), 1.96 (dt,  $J_1=4.0$  Hz,  $J_2=13.6$  Hz,  $J_3=13.6$  Hz, H11''), 1.99 (dt,  $J_1=3.8$  Hz,  $J_2=13.8$  Hz,  $J_3=13.8$  Hz, H11\*), 2.50 (bdd,  $J_1=4.4$  Hz,  $J_2=13.5$  Hz,  $J_3=13.5$  Hz, H18''), 2.53 (bdd,  $J_1=4.4$  Hz,  $J_2=13.5$  Hz,  $J_3=13.5$  Hz, H18), 2.84 (bdd,  $J_1=4.8$  Hz,  $J_2=14.1$  Hz, H18\*), 2.98 (dd,  $J_1=4.2$  Hz,  $J_2=11.6$  Hz, H3''), 2.99 (dd,  $J_1=4.3$  Hz,  $J_2=11.6$  Hz, H3\*), 3.21 (dd,  $J_1=4.6$  Hz,  $J_2=11.3$  Hz, H3), 3.47-3.53 (m, H1''), 3.47-3.53 (m, H1'), 3.57-3.63 (m, H1''), 3.57-3.63 (m, H1'), 4.56 (d,  $J=12.7$  Hz, H11'), 4.56 (d,  $J=12.7$  Hz, H11''), 4.83 (d,  $J=12.7$  Hz, H11'),

4.83 (d,  $J=12.7$  Hz, H11'''), 5.29 (t,  $J=3.8$  Hz, H12\*), 5.35 (t,  $J=3.8$  Hz, H12), 5.35 (t,  $J=3.8$  Hz, H12''), 7.74 (s, H9'''), 7.76 (s, H9').

**$^{13}\text{C}$  NMR:**  $\delta$  15.40 (C24''), 15.40 (C24\*), 15.40 (C25), 16.50 (C25''), 16.50 (C24), 16.50 (C25\*), 16.70 (C26''), 16.90 (C26), 17.10 (C26\*), 18.20 (C6''), 18.20 (C6\*), 18.30 (C6), 20.60 (C2), 22.50 (C16\*), 22.60 (C16''), 23.40 (C11\*), 23.40 (C2\*), 23.50 (C2''), 23.50 (C11''), 23.50 (C30\*), 23.50 (C16), 23.60 (C11), 23.60 (C30''), 23.70 (C30), 25.70 (C27), 25.70 (C27\*), 25.90 (C27''), 27.90 (C15''), 28.00 (C15\*), 28.10 (C23''), 28.10 (C15), 28.20 (C23\*), 28.30 (C23), 30.70 (C20\*), 30.70 (C20''), 30.70 (C20), 32.30 (C22''), 32.40 (C22\*), 32.40 (C7\*), 32.50 (C7''), 33.00 (C29\*), 33.00 (C22), 33.10 (C7), 33.10 (C29), 33.40 (C29''), 33.90 (C21''), 33.90 (C21\*), 34.10 (C21), 36.80 (C10''), 36.90 (C10\*), 37.00 (C10), 38.10 (C1\*), 38.20 (C1''), 38.70 (C4\*), 38.70 (C4''), 38.80 (C1), 38.90 (C8), 39.10 (C8''), 39.30 (C8\*), 39.40 (C1'''), 39.40 (C1'), 41.10 (C18\*), 41.70 (C14\*), 42.00 (C14), 42.00 (C18), 42.00 (C18''), 42.00 (C14''), 42.60 (C4), 45.90 (C19\*), 46.30 (C19), 46.30 (C19''), 46.40 (C17''), 46.40 (C17\*), 46.70 (C17), 47.50 (C9\*), 47.50 (C9''), 51.90 (C9), 52.30 (C8'), 52.30 (C8'''), 55.00 (C5\*), 55.10 (C5''), 55.40 (C5), 61.60 (C11'), 61.70 (C11'''), 69.70 (C7'''), 69.70 (C7'), 70.20 (C6'), 70.20 (C6'''), 70.40 (C5'''), 70.60 (C5'), 70.60 (C3'), 70.60 (C3'''), 70.60 (C4'''), 70.60 (C4'), 70.70 (C2'''), 70.70 (C2'), 78.90 (C3), 87.20 (C3''), 87.50 (C3\*), 122.27 (C12\*), 122.30 (C12), 122.37 (C12''), 125.20 (C9'''), 125.30 (C9'), 143.80 (C13\*), 144.35 (C10'''), 144.40 (C10'), 144.70 (C13''), 144.70 (C13), 178.20 (C28), 180.70 (C28\*), 181.70 (C28'').

**MS (ES):**  $m/z = 1847.4$   $[\text{M}+\text{H}]^+$

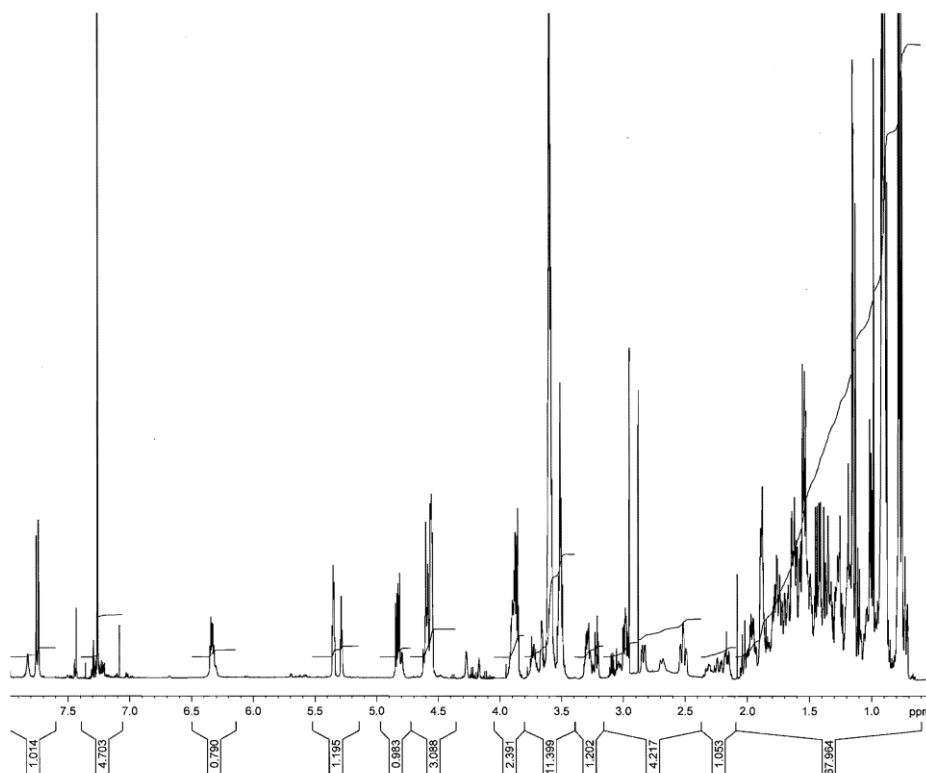

Z.Wimmer MC-48  
in CDCl<sub>3</sub>, ref=TMS  
23.3.2020 DA

Current Data Parameters  
NAME Wimmer-MC48  
EXPNO 1  
PROCNO 1

F2 - Acquisition Parameters  
Date\_ 20200323  
Time 9.14  
INSTRUM spect  
PROBHD 5 mm CPTCI 1H-  
PULPROG zg30  
TD 38362  
SOLVENT CDCl<sub>3</sub>  
NS 32  
DS 0  
SWH 4795.396 Hz  
FIDRES 0.125004 Hz  
AQ 3.9998779 sec  
RG 55.4  
DIW 104.267 usec  
DE 20.00 usec  
TE 298.1 K  
D1 0 sec  
TD0 1

===== CHANNEL f1 =====  
SFO1 600.1325205 MHz  
NUC1 1H  
P1 9.00 usec  
PLW1 6.0000000 W  
  
F2 - Processing parameters  
SI 131072  
SF 600.1300152 MHz  
WDW no  
SSB 0  
LB 0 Hz  
GB 0  
PC 1.00

58822

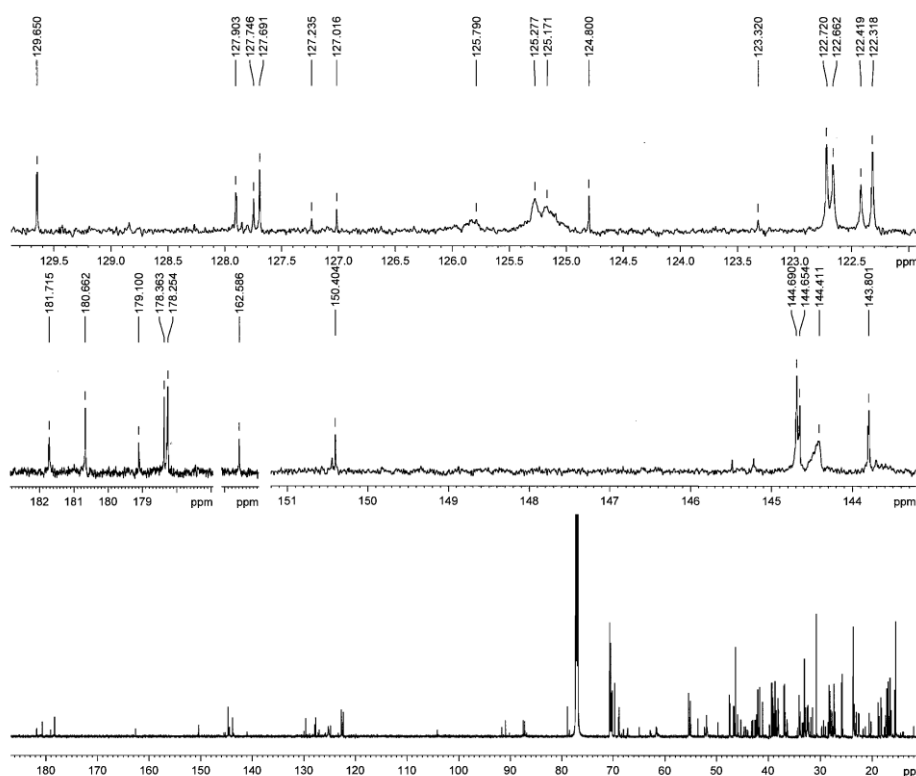

Z.Wimmer MC-48  
in CDCl<sub>3</sub>, ref=TMS  
23.3.2020 DA

Current Data Parameters  
NAME Wimmer-MC48  
EXPNO 2  
PROCNO 1

F2 - Acquisition Parameters  
Date\_ 20200324  
Time 7.20  
INSTRUM spect  
PROBHD 5 mm CPTCI 1H-  
PULPROG zgpg30  
TD 59520  
SOLVENT CDCl<sub>3</sub>  
NS 24337  
DS 0  
SWH 29761.904 Hz  
FIDRES 0.500032 Hz  
AQ 0.9999360 sec  
RG 196.18  
DIW 16.800 usec  
DE 18.00 usec  
TE 298.1 K  
D1 1.00000000 sec  
D11 0.03000000 sec  
TD0 1

===== CHANNEL f1 =====  
SFO1 150.9178993 MHz  
NUC1 13C  
P1 12.00 usec  
PLW1 80.0000000 W  
  
===== CHANNEL f2 =====  
SFO2 600.1324005 MHz  
NUC2 1H  
CPDPRG2 waltz16  
PCPD2 70.00 usec  
PLW2 6.00000000 W  
PLW12 0.09918400 W  
PLW13 0.04860000 W

F2 - Processing parameters  
SI 131072  
SF 150.9028136 MHz  
WDW EM  
SSB 0  
LB 1.00 Hz  
GB 0

58822



### 1.12. Benzyl (3 $\beta$ )-3-hydroxyolean-18-en-28-oate (**2b**)

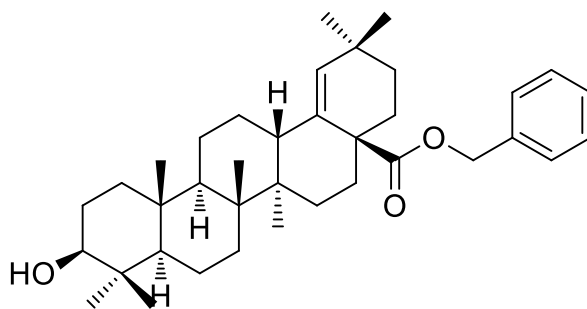

Procedure A was applied, using **1b** as the starting compound, yielding **2b** in a 96 % yield.

**<sup>1</sup>H NMR:**  $\delta$  0.66 (1H, dd,  $J_1=2.2$  Hz,  $J_2=11.5$  Hz, H5), 0.74 (3H, d,  $J=0.5$  Hz, H27), 0.75 (3H, s, H26), 0.76 (3H, d,  $J=0.6$  Hz, H25), 0.82 (3H, d,  $J=0.8$  Hz, H24), 0.95 (3H, s, H23), 0.95 (3H, s, H30), 0.97 (3H, s, H29), 1.72 (2H, dt,  $J_1=3.6$  Hz,  $J_2=3.6$  Hz,  $J_3=13.0$  Hz, H1), 1.92 (2H, ddd,  $J_1=3.3$  Hz,  $J_2=6.1$  Hz,  $J_3=13.8$  Hz, H7), 2.04 (1H, ddd,  $J_1=1.8$  Hz,  $J_2=3.8$  Hz,  $J_3=12.0$  Hz, H13), 2.17 (3H, ddd,  $J_1=3.1$  Hz,  $J_2=3.8$  Hz,  $J_3=13.3$  Hz, H16), 3.19 (1H, dd,  $J_1=4.8$  Hz,  $J_2=11.5$  Hz, H3), 5.09 (2H, d,  $J=12.4$  Hz, H1'), 5.11 (1H, dd,  $J_1=0.9$  Hz,  $J_2=1.8$  Hz, H19), 5.17 (2H, d,  $J=12.4$  Hz, H1'), 7.20-7.28 (1H, m, H4'), 7.20-7.28 (1H, m, H3'), 7.20-7.28 (1H, m, H5').

**<sup>13</sup>C NMR:**  $\delta$  14.91 (q, C27), 15.37 (q, C26), 15.81 (q, C25), 16.63 (q, C24), 18.18 (t, C6), 20.88 (t, C11), 20.88 (t, C2), 25.97 (t, C12), 27.38 (t, C15), 27.93 (q, C23), 29.29 (q, C30), 30.37 (q, C29), 31.98 (s, C20), 33.35 (t, C21), 33.44 (t, C7), 33.46 (t, C16), 34.52 (t, C22), 37.17 (s, C10), 38.86 (s, C8), 38.91 (t, C1), 40.57 (s, C14), 41.30 (d, C13), 42.47 (s, C4), 48.15 (s, C17), 51.13 (d, C9), 55.46 (d, C5), 66.04 (t, C1'), 78.95 (d, C3), 127.94 (d, C5'), 128.04 (d, C3'), 128.42 (d, C4'), 132.47 (d, C19), 136.49 (s, C2'), 137.14 (s, C18), 176.39 (s, C28).

**MS (ES):**  $m/z = 547.3$  [M+H]<sup>+</sup>

### 1.13. Benzyl (3 $\beta$ )-3-(prop-2-yn-1-yloxy)olean-18-en-28-oate (**3b**)

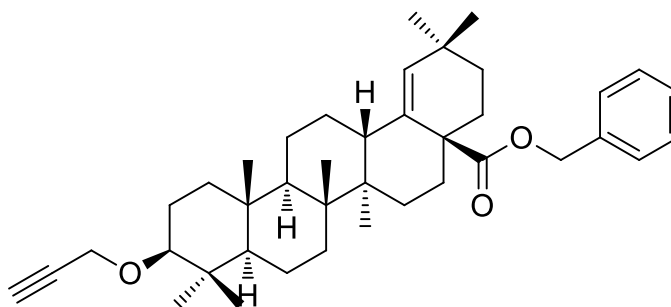

Procedure B was applied, using **2b** as the starting compound, yielding **3b** in a 94 % yield.

**<sup>1</sup>H NMR:**  $\delta$  0.68 (1H, dd,  $J_1=2.1$  Hz,  $J_2=11.4$  Hz, H5), 0.74 (3H, d,  $J=0.6$  Hz, H27), 0.75 (3H, s, H26), 0.76 (3H, d,  $J=0.5$  Hz, H25), 0.83 (3H, d,  $J=0.8$  Hz, H24), 0.95 (3H, s, H30), 0.96 (3H, s, H23), 0.97 (3H, s, H29), 1.76 (2H, dt,  $J_1=3.6$  Hz,  $J_2=3.6$  Hz,  $J_3=12.9$  Hz, H1), 1.92 (2H, ddd,  $J_1=3.3$  Hz,  $J_2=6.1$  Hz,  $J_3=13.8$  Hz, H7), 2.04 (1H, ddd,  $J_1=1.7$  Hz,  $J_2=3.6$  Hz,  $J_3=11.7$  Hz, H13), 2.11 (1H, dd,  $J_1=0.9$  Hz,  $J_2=1.8$  Hz, H19), 2.17 (2H, ddd,  $J_1=3.0$  Hz,  $J_2=3.9$  Hz,  $J_3=13.4$  Hz, H16), 2.36 (1H, t,  $J=2.3$  Hz, H8'), 3.00 (1H, dd,  $J_1=4.4$  Hz,  $J_2=11.8$  Hz, H3), 4.14 (2H, dd,  $J_1=2.3$  Hz,  $J_2=16.0$  Hz, H6'), 4.22 (2H, dd,  $J_1=2.3$  Hz,  $J_2=16.0$  Hz, H6'), 5.09 (2H, d,  $J=12.4$  Hz, H1'), 5.16 (2H, d,  $J=12.4$  Hz, H1'), 7.28-7.36 (1H, m, H4'), 7.28-7.36 (1H, m, H3'), 7.28-7.36 (1H, m, H5').

**<sup>13</sup>C NMR:**  $\delta$  14.88 (q, C27), 15.82 (q, C26), 16.20 (q, C25), 16.62 (q, C24), 18.12 (t, C6), 20.91 (t, C11), 22.60 (t, C2), 25.99 (t, C12), 27.92 (q, C23), 27.92 (t, C15), 29.15 (q, C30), 29.27 (t, C20), 30.38 (q, C29), 31.98 (t, C16), 31.98 (t, C21), 33.35 (t, C7), 34.53 (t, C22), 37.12 (s, C10), 38.59 (s, C8), 38.78 (t, C1), 40.62 (s, C14), 41.29 (d, C13), 42.46 (s, C4), 48.15 (s, C17), 51.11 (d, C9), 56.03 (d, C5), 56.42 (t, C6'), 66.04 (t, C1'), 73.41 (d, C8'), 80.95 (s, C7'), 85.82 (d, C3), 127.94 (d, C5'), 128.04 (d, C3'), 128.42 (d, C4'), 132.44 (d, C19), 136.48 (s, C2'), 137.17 (s, C18), 176.37 (s, C28).

**MS (ES):**  $m/z = 585.3$   $[M+H]^+$

1.14. (3 $\beta$ )-3-(Acetyloxy)olean-18-en-28-oic acid (**4b**)

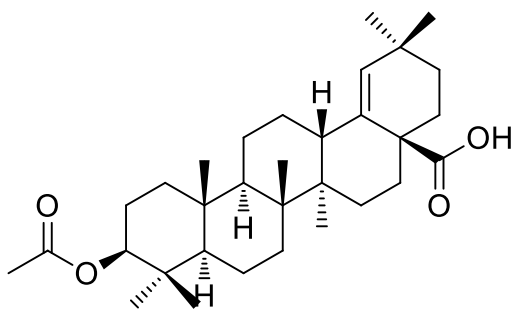

Procedure C was applied, using **1b** as the starting compound, yielding **4b** in a 98 % yield.

**<sup>1</sup>H NMR:**  $\delta$  0.78 (3H, d,  $J=0.5$  Hz, H27), 0.81 (1H, dd,  $J_1=2.1$  Hz,  $J_2=11.4$  Hz, H5), 0.84 (3H, s, H25), 0.85 (3H, s, H23), 0.90 (3H, d,  $J=0.8$  Hz, H24), 0.98 (3H, s, H30), 1.00 (3H, d,  $J=0.5$  Hz, H26), 1.00 (3H, s, H29), 1.03 (2H, bdt,  $J_1=4.8$  Hz,  $J_2=13.0$  Hz,  $J_3=13.0$  Hz, H1), 1.21 (2H, ddd,  $J_1=3.0$  Hz,  $J_2=3.9$  Hz,  $J_3=13.4$  Hz, H15), 1.75 (2H, dt,  $J_1=3.6$  Hz,  $J_2=3.6$  Hz,  $J_3=13.2$  Hz, H1), 2.00 (2H, ddd,  $J_1=3.4$  Hz,  $J_2=602.0$  Hz,  $J_3=13.6$  Hz, H7), 2.04 (3H, s, OAc), 2.17 (2H, ddd,  $J_1=3.0$  Hz,  $J_2=4.0$  Hz,  $J_3=13.5$  Hz, H16), 2.23 (1H, ddd,  $J_1=1.9$  Hz,  $J_2=3.4$  Hz,  $J_3=11.4$  Hz, H13), 4.49 (1H, dd,  $J_1=5.3$  Hz,  $J_2=11.3$  Hz, H3), 5.18 (1H, dd,  $J_1=0.9$  Hz,  $J_2=1.9$  Hz, H19).

**<sup>13</sup>C NMR:**  $\delta$  14.85 (q, C27), 16.05 (q, C26), 16.51 (q, C25), 16.69 (q, C24), 18.19 (t, C6), 21.00 (t, C11), 21.23 (q, OAc), 23.75 (t, C2), 26.02 (t, C12), 27.96 (q, C23), 29.12 (q, C30), 29.41 (t, C15), 30.32 (q, C29), 32.08 (s, C20), 33.42 (t, C16), 33.55 (t, C7), 33.56 (t, C21), 34.58 (t, C22), 37.24 (s, C10), 37.89 (s, C8), 38.71 (t, C1), 40.79 (s, C14), 41.42 (d, C13), 42.67 (s, C4), 48.00 (s, C17), 51.17 (d, C9), 55.70 (d, C5), 81.00 (d, C3), 133.36 (d, C19), 136.77 (s, C18), 170.94 (s, OAc), 180.54 (s, C28).

**MS (ES):**  $m/z$  = 516.2  $[M+NH_4]^+$ ; 496.9  $[M-H]^-$

1.15. 28-[(2-{2-[2-(2-Azidoethoxy)ethoxy]ethoxy}ethyl)amino]-28-oxoolean-18-en-3-yl acetate (**5b**)

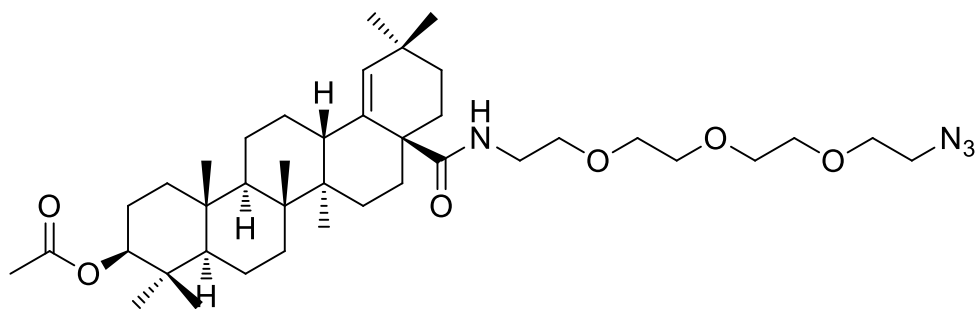

Procedure E was applied, using **4b** as the starting compound, yielding **5b** in a 99 % yield.

**<sup>1</sup>H NMR:**  $\delta$  0.75 (3H, s, H27), 0.79 (1H, dd,  $J_1=2.0$  Hz,  $J_2=11.4$  Hz, H5), 0.83 (3H, s, H23), 0.84 (3H, s, H25), 0.88 (3H, d,  $J=0.7$  Hz, H24), 0.95 (3H, s, H26), 0.98 (3H, s, H30), 1.00 (3H, s, H29), 1.74 (2H, dt,  $J_1=3.5$  Hz,  $J_2=3.5$  Hz,  $J_3=13.0$  Hz, H1), 1.83 (2H, ddd,  $J_1=3.5$  Hz,  $J_2=4.9$  Hz,  $J_3=13.9$  Hz, H7), 2.04 (3H, s, H10'), 2.12 (1H, ddd,  $J_1=1.6$  Hz,  $J_2=3.3$  Hz,  $J_3=11.6$  Hz, H13), 2.42 (2H, dt,  $J_1=3.5$  Hz,  $J_2=3.5$  Hz,  $J_3=13.4$  Hz, H16), 3.37-3.68 (2H, m, H6'), 3.37-3.40 (2H, m, H8'), 3.37-3.68 (2H, m, H5'), 3.37-3.68 (2H, m, H7'), 3.37-3.68 (2H, m, H3'), 3.37-3.68 (2H, m, H4'), 3.37-3.68 (2H, m, H2'), 3.41-3.50 (2H, m, H1'), 4.74 (1H, dd,  $J_1=5.2$  Hz,  $J_2=11.3$  Hz, H3), 5.31 (1H, dd,  $J_1=0.7$  Hz,  $J_2=1.8$  Hz, H19), 6.25 (0H, 5.9, H1'-NH).

**<sup>13</sup>C NMR:**  $\delta$  14.88 (q, C27), 16.01 (q, C26), 16.47 (q, C25), 16.76 (q, C24), 18.06 (t, C6), 21.01 (t, C11), 21.31 (q, C10'), 23.64 (t, C2), 26.21 (t, C12), 27.88 (q, C23), 28.92 (q, C30), 29.33 (t, C15), 30.89 (q, C29), 32.28 (s, C20), 32.70 (t, C21), 33.19 (t, C7), 33.94 (t, C16), 34.39 (t, C22), 37.10 (s, C10), 37.78 (s, C8), 38.60 (t, C1), 39.34 (t, C1'), 40.69 (s, C14), 41.53 (d, C13), 42.60 (s, C4), 48.21 (s, C17), 50.65 (t, C8'), 51.05 (d, C9), 55.56 (d, C5), 70.08 (t, C7'), 70.35 (t, C6'), 70.37 (t, C5'), 70.57 (t, C4'), 70.63 (t, C3'), 70.69 (t, C2'), 80.86 (d, C3), 135.62 (d, C19), 138.40 (s, C18), 171.03 (s, C9'), 175.55 (s, C28).

**MS (ES):**  $m/z$  = 699.2 [M+H]<sup>+</sup>; 697.2 [M-H]<sup>-</sup>

1.16. Benzyl (3 $\beta$ )-3-{[1-({2-[2-(2-{[3-(acetyloxy)-28-oxoolean-18-en-28-yl]amino}ethoxy)-ethoxy]ethoxy)methyl)-1H-1,2,3-triazol-4-yl]methoxy}olean-18-en-28-oate (**6b**)

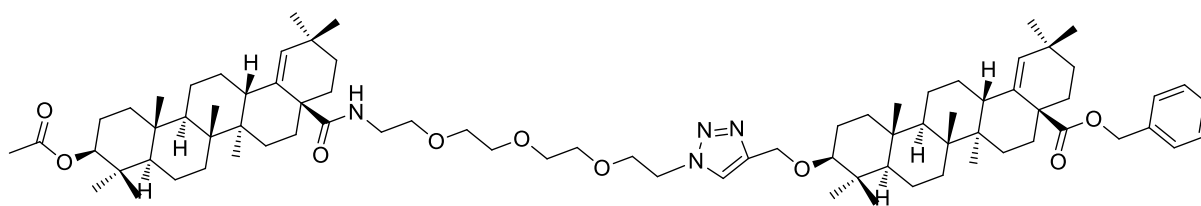

Procedure F was applied, using **5b** and **3b** as the starting compounds, yielding **6b** in a 99 % yield.

**<sup>1</sup>H NMR:**  $\delta$  0.66 (1H, dd,  $J_1=2.0$  Hz,  $J_2=11.4$  Hz, H5''), 0.73 (3H, s, H27''), 0.74 (3H, s, H25''), 0.75 (3H, s, H27), 0.75 (3H, s, H26''), 0.79 (1H, dd,  $J_1=2.0$  Hz,  $J_2=11.3$  Hz,  $J_3=13.6$  Hz, H5), 0.82 (3H, d,  $J=0.6$  Hz, H24''), 0.83 (3H, s, H25), 0.84 (3H, s, H23), 0.87 (3H, s, H23''), 0.87 (3H, d,  $J=0.6$  Hz, H24), 0.94 (3H, s, H26), 0.96 (3H, s, H30''), 0.97 (3H, s, H29''), 0.98 (3H, s, H30), 0.99 (3H, s, H29), 1.73 (2H, dt,  $J_1=3.6$  Hz,  $J_2=3.6$  Hz,  $J_3=13.5$  Hz, H1), 1.75 (2H, dt,  $J_1=3.6$  Hz,  $J_2=3.6$  Hz,  $J_3=13.5$  Hz, H1''), 1.82 (2H, ddd,  $J_1=3.5$  Hz,  $J_2=4.9$  Hz,  $J_3=13.8$  Hz, H7), 1.91 (2H, ddd,  $J_1=3.3$  Hz,  $J_2=6.0$  Hz,  $J_3=13.7$  Hz, H7''), 2.04 (3H, s, OAc), 2.10 (1H, m,  $J=13.1$  Hz, H13), 2.10-2.13 (1H, m, H13''), 2.16 (2H, ddd,  $J_1=3.2$  Hz,  $J_2=3.6$  Hz,  $J_3=13.4$  Hz, H16''), 2.42 (2H, dt,  $J_1=3.5$  Hz,  $J_2=3.5$  Hz,  $J_3=13.4$  Hz, H16), 2.96 (2H, dd,  $J_1=4.4$  Hz,  $J_2=11.8$  Hz, H3''), 3.37-3.42 (2H, m, H1'), 3.46-3.52 (2H, m, H1'), 3.50-3.62 (2H, m, H3'), 3.50-3.62 (2H, m, H2'), 3.50-3.62 (2H, m, H4'), 3.50-3.62 (2H, m, H6'), 3.50-3.62 (2H, m, H5'), 3.87 (2H, t,  $J=5.3$  Hz, H7'), 4.47 (1H, dd,  $J_1=5.2$  Hz,  $J_2=11.4$  Hz, H3), 4.55 (2H, t,  $J=5.3$  Hz, H8'), 4.59 (2H, d,  $J=12.7$  Hz, H11'), 4.80 (2H, d,  $J=12.7$  Hz, H11''), 5.09 (2H, d,  $J=12.4$  Hz, H1'''), 5.11 (1H, dd,  $J_1=0.6$  Hz,  $J_2=1.8$  Hz, H19''), 5.11 (2H, d,  $J=12.4$  Hz, H1'''), 5.30 (1H, dd,  $J_1=0.6$  Hz,  $J_2=11.8$  Hz, H19), 7.28-7.37 (1H, m, H5'''), 7.28-7.35 (1H, m, H3'''), 7.28-7.36 (1H, m, H4'''), 7.72 (1H, s, H9').

**<sup>13</sup>C NMR:**  $\delta$  14.92 (q, C27''), 14.92 (q, C27), 15.84 (q, C26''), 16.05 (q, C26), 16.32 (q, C25''), 16.53 (q, C25), 16.68 (q, C24''), 16.80 (q, C24), 18.06 (t, C6), 18.15 (t, C6''), 20.92 (t, C11''), 21.04 (t, C11), 21.34 (q, OAc), 22.85 (t, C2''), 23.67 (t, C2), 25.98 (t, C12''), 26.27 (t, C12), 27.91 (q, C23), 28.02 (q, C23''), 28.96 (q, C30), 29.17 (q, C30''), 29.30 (t, C15''), 29.35 (t, C15), 30.39 (q, C29''), 30.95 (q, C29), 32.00 (s, C20''), 32.31 (t, C21''), 32.31 (s, C20), 32.71 (t, C21), 33.22 (t, C7), 33.37 (t, C7''), 33.47 (t, C16''), 33.47 (t, C16), 34.41 (t, C22), 34.53 (t, C22''), 37.13 (s, C10''), 37.15 (s, C10), 37.81 (s, C8), 37.81 (s, C8''), 38.64 (t, C1), 38.82 (t, C1''), 39.35 (t, C1'), 40.62 (s, C14''), 40.72 (s, C14), 41.32 (d, C13''), 41.58 (d, C13), 42.48 (s, C4''), 42.64 (s, C4), 48.16 (s, C17''), 48.24 (s, C17), 50.94 (t, C8'), 51.06 (d, C9), 51.09 (d, C9''), 55.58 (d, C5), 55.83 (d, C5''), 62.46 (t, C11'), 66.05 (t, C1'''), 69.22 (t, C7'), 70.37 (t, C6'), 70.37 (t, C5'),

70.49 (t, C4'), 70.55 (t, C3'), 70.59 (t, C2'), 80.85 (d, C3), 86.49 (d, C3''), 124.15 (d, C9'), 128.05 (d, C4'''), 128.44 (d, C3'''), 128.96 (d, C5'''), 132.52 (d, C19''), 135.62 (d, C19), 136.51 (s, C2'''), 137.12 (s, C18''), 138.48 (s, C18), 145.51 (s, C10'), 171.05 (s, OAc), 175.59 (s, C28), 176.42 (s, C28'').

**MS (ES):**  $m/z$  = 1284.0  $[M+H]^+$ ; 1281.9  $[M-H]^-$

1.17. (3 $\beta$ )-3-{{[1-({2-[2-(2-{[3-(Acetyloxy)-28-oxoolean-18-en-28-yl]amino}ethoxy)ethoxy]ethoxy}ethyl)-1*H*-1,2,3-triazol-4-yl]methoxy}olean-18-en-28-oic acid (**7b**)

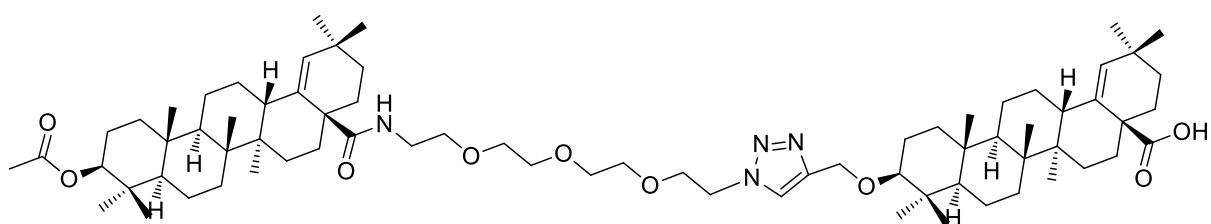

Procedure G was applied, using **6b** as the starting compound, yielding **7b** in a 98 % yield.

**<sup>1</sup>H NMR:**  $\delta$  0.70 (1H, dd,  $J_1=2.0$  Hz,  $J_2=11.2$  Hz, H5''), 0.77 (3H, s, H27''), 0.78 (3H, s, H25''), 0.79 (3H, s, H27), 0.81 (1H, dd,  $J_1=1.8$  Hz,  $J_2=11.3$  Hz, H5), 0.85 (3H, s, H25), 0.86 (3H, s, H23), 0.88 (3H, s, H24''), 0.90 (3H, s, H24), 0.93 (3H, s, H23''), 0.97 (3H, s, H26''), 0.99 (3H, s, H30''), 1.00 (3H, s, H30), 1.00 (3H, s, H26), 1.02 (3H, s, H29), 1.02 (3H, s, H29''), 1.75 (2H, dt,  $J_1=3.7$  Hz,  $J_2=3.7$  Hz,  $J_3=13.3$  Hz, H1), 1.80 (2H, dt,  $J_1=3.6$  Hz,  $J_2=3.6$  Hz,  $J_3=13.2$  Hz, H1''), 1.84 (2H, ddd,  $J_1=3.7$  Hz,  $J_2=4.6$  Hz,  $J_3=14.1$  Hz, H21), 2.00 (2H, ddd,  $J_1=3.4$  Hz,  $J_2=6.0$  Hz,  $J_3=13.8$  Hz, H7''), 2.18 (2H, dt,  $J_1=3.4$  Hz,  $J_2=3.4$  Hz,  $J_3=13.4$  Hz, H16''), 2.43 (2H, dt,  $J_1=3.4$  Hz,  $J_2=3.4$  Hz,  $J_3=13.2$  Hz, H16), 3.03 (1H, dd,  $J_1=4.4$  Hz,  $J_2=11.8$  Hz, H3''), 3.39-3.45 (2H, m, H1'), 3.50-3.54 (2H, m, H1'), 3.51-3.66 (2H, m, H3'), 3.51-3.66 (2H, m, H2'), 3.51-3.66 (2H, m, H5'), 3.51-3.66 (2H, m, H4'), 3.51-3.66 (2H, m, H6'), 3.93-3.96 (2H, m, H7'), 4.49 (1H, dd,  $J_1=5.0$  Hz,  $J_2=11.5$  Hz, H3), 4.67 (2H, t,  $J=4.6$  Hz, H8'), 4.77 (1H, bd,  $J=13.3$  Hz, H11'), 4.98 (1H, bd,  $J=13.3$  Hz, H11'), 5.20 (1H, bd,  $J=1.6$  Hz, H19''), 5.33 (1H, bd,  $J=1.6$  Hz, H19), 7.99 (1H, s, H9').

**<sup>13</sup>C NMR:**  $\delta$  14.89 (q, C27), 14.92 (q, C27''), 16.01 (q, C26''), 16.03 (q, C26), 16.28 (t, C12), 16.31 (q, C25''), 16.50 (q, C25), 16.69 (q, C24''), 16.77 (q, C24), 18.06 (t, C6), 18.13 (t, C6''), 20.92 (t, C11''), 21.01 (t, C11), 21.34 (q, OAc), 22.73 (t, C2''), 23.61 (t, C2), 25.94 (t, C12''), 27.87 (q, C23), 28.11 (q, C23''), 28.93 (q, C30), 29.08 (q, C30''), 29.31 (t, C15''), 29.36 (t, C15),

30.33 (q, C29''), 30.93 (q, C29), 32.06 (t, C20''), 32.29 (s, C20), 32.66 (t, C21), 32.66 (t, C21''), 33.18 (t, C7), 33.35 (t, C7''), 33.44 (t, C16''), 33.50 (t, C16), 34.37 (t, C22), 34.45 (t, C22''), 37.09 (s, C10), 37.13 (s, C10''), 37.77 (s, C8), 37.77 (s, C8''), 38.62 (t, C1''), 38.83 (t, C1), 39.38 (t, C1'), 40.67 (s, C14''), 40.69 (s, C14), 41.36 (d, C13''), 41.57 (d, C13), 42.58 (s, C4''), 42.62 (s, C4), 47.88 (s, C17''), 48.22 (s, C17), 51.00 (d, C9''), 51.03 (d, C9), 52.67 (t, C8'), 55.53 (d, C5), 55.68 (d, C5''), 60.84 (t, C11'), 68.50 (t, C7'), 70.26 (t, C6'), 70.33 (t, C5'), 70.41 (t, C4'), 70.55 (t, C3'), 70.62 (t, C2'), 80.93 (d, C3), 87.81 (d, C3''), 126.00 (t, C9'), 133.34 (d, C19''), 135.67 (d, C19), 136.79 (s, C18''), 138.39 (s, C18), 145.48 (t, C10'), 171.23 (s, OAc), 175.75 (s, C28), 179.34 (s, C28'').

**MS (ES):**  $m/z$  = 1193.8  $[M+H]^+$ ; 1191.7  $[M-H]^-$

1.18. (3 $\beta$ )-3-[[1-(2-{2-[2-(2-{[(3 $\beta$ )-3-hydroxy-28-oxoolean-18-en-28-yl]amino}ethoxy)-ethoxy]ethoxy}ethyl)-1H-1,2,3-triazol-4-yl]methoxy]olean-18-en-28-oic acid (**8b**)

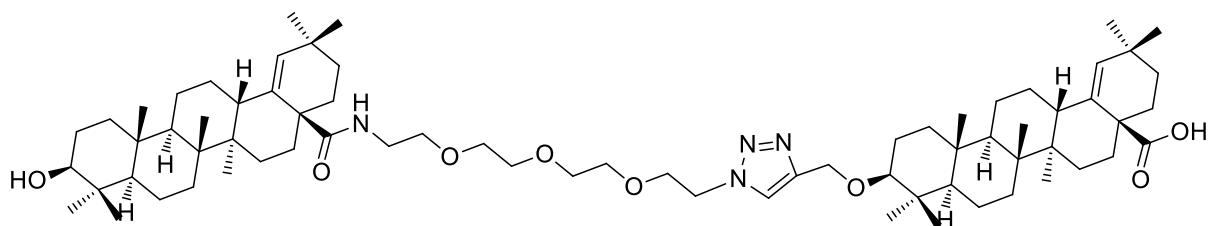

Procedure H was applied, using **7b** as the starting compound, yielding **8b** in a 99 % yield.

**<sup>1</sup>H NMR:**  $\delta$  0.68 (1H, dd,  $J_1=2.0$  Hz,  $J_2=11.5$  Hz, H5''), 0.75 (3H, s, H25), 0.75 (3H, s, H27''), 0.76 (3H, s, H27), 0.76 (3H, s, H25''), 0.85 (3H, s, H24), 0.86 (3H, s, H24''), 0.88 (3H, s, H23), 0.94 (3H, s, H26''), 0.94 (3H, s, H26), 0.96 (3H, s, H23''), 0.97 (3H, s, H30), 0.97 (3H, s, H30''), 0.99 (3H, s, H29''), 0.99 (3H, s, H29), 1.73 (2H, dt,  $J_1=3.6$  Hz,  $J_2=3.6$  Hz,  $J_3=13.0$  Hz, H1), 1.77 (2H, dt,  $J_1=3.5$  Hz,  $J_2=3.5$  Hz,  $J_3=13.6$  Hz, H1''), 1.83 (2H, ddd,  $J_1=3.6$  Hz,  $J_2=4.8$  Hz,  $J_3=13.8$  Hz, H21), 1.98 (2H, ddd,  $J_1=3.2$  Hz,  $J_2=6.0$  Hz,  $J_3=13.7$  Hz, H7''), 2.12 (1H, bd,  $J=10.5$  Hz, H13''), 2.16 (2H, dt,  $J_1=3.5$  Hz,  $J_2=3.5$  Hz,  $J_3=13.7$  Hz, H16''), 2.21 (1H, bd,  $J=11.7$  Hz, H13), 2.42 (2H, dt,  $J_1=3.6$  Hz,  $J_2=3.6$  Hz,  $J_3=13.4$  Hz, H16), 2.97 (1H, dd,  $J_1=4.2$  Hz,  $J_2=11.6$  Hz, H3''), 3.21 (1H, dd,  $J_1=4.7$  Hz,  $J_2=11.6$  Hz, H3), 3.39-3.44 (2H, m, H1'), 3.48-3.52 (2H, m, H1'), 3.56-3.62 (2H, m, H3'), 3.56-3.62 (2H, m, H6'), 3.56-3.62 (2H, m, H5'), 3.56-3.62 (2H, m, H2'), 3.56-3.62 (2H, m, H4'), 3.86 (2H, t,  $J=5.1$  Hz, H7'), 4.54 (2H, t,  $J=35.1$  Hz, H8'), 4.58 (2H, d,  $J=12.5$  Hz, H11'), 4.78 (2H, d,  $J=12.5$  Hz, H11'), 5.17 (1H, bd,  $J=1.6$  Hz, H19''), 5.30 (1H, bd,  $J=1.7$  Hz, H19), 7.70 (1H, bs, H9').

**$^{13}\text{C}$  NMR:**  $\delta$  14.88 (q, C27), 14.91 (q, C27"), 15.40 (q, C26), 16.03 (q, C25), 16.05 (q, C26"), 16.32 (q, C25"), 16.68 (q, C24"), 16.71 (q, C24), 18.15 (t, C6), 18.18 (t, C6"), 20.94 (t, C11"), 20.99 (t, C11), 20.99 (t, C2), 22.87 (t, C2"), 25.98 (t, C12"), 26.27 (t, C12), 27.92 (q, C23), 28.01 (q, C23"), 28.94 (q, C30), 29.09 (q, C30"), 29.32 (t, C15"), 29.37 (t, C15), 30.34 (q, C29"), 30.92 (q, C29), 32.05 (s, C20"), 32.28 (s, C20), 32.69 (t, C21), 33.19 (t, C7), 33.35 (t, C21"), 33.46 (t, C16"), 33.48 (t, C16), 33.94 (t, C7"), 34.45 (t, C22), 34.50 (t, C22"), 37.16 (s, C10), 37.17 (s, C10"), 38.65 (t, C1"), 38.82 (s, C8"), 38.85 (s, C8), 38.94 (t, C1), 39.32 (t, C1'), 40.67 (s, C14"), 40.67 (s, C14), 41.38 (d, C13"), 41.57 (d, C13), 42.57 (s, C4"), 42.62 (s, C4), 47.90 (s, C17"), 48.22 (s, C17), 50.92 (t, C8'), 51.06 (d, C9"), 51.11 (d, C9), 55.45 (d, C5), 55.81 (d, C5"), 62.49 (t, C11'), 69.26 (t, C7'), 70.31 (t, C6'), 70.37 (t, C5'), 70.45 (t, C4'), 70.51 (t, C3'), 70.56 (t, C2'), 78.95 (d, C3), 86.75 (d, C3"), 126.97 (d, C9'), 133.23 (d, C19"), 135.55 (d, C19), 136.86 (s, C18"), 138.51 (s, C18), 145.50 (s, C10'), 175.58 (s, C28), 179.76 (s, C28").

**MS (ES):**  $m/z$  = 1151.7  $[\text{M}+\text{H}]^+$ ; 1149.8  $[\text{M}-\text{H}]^-$

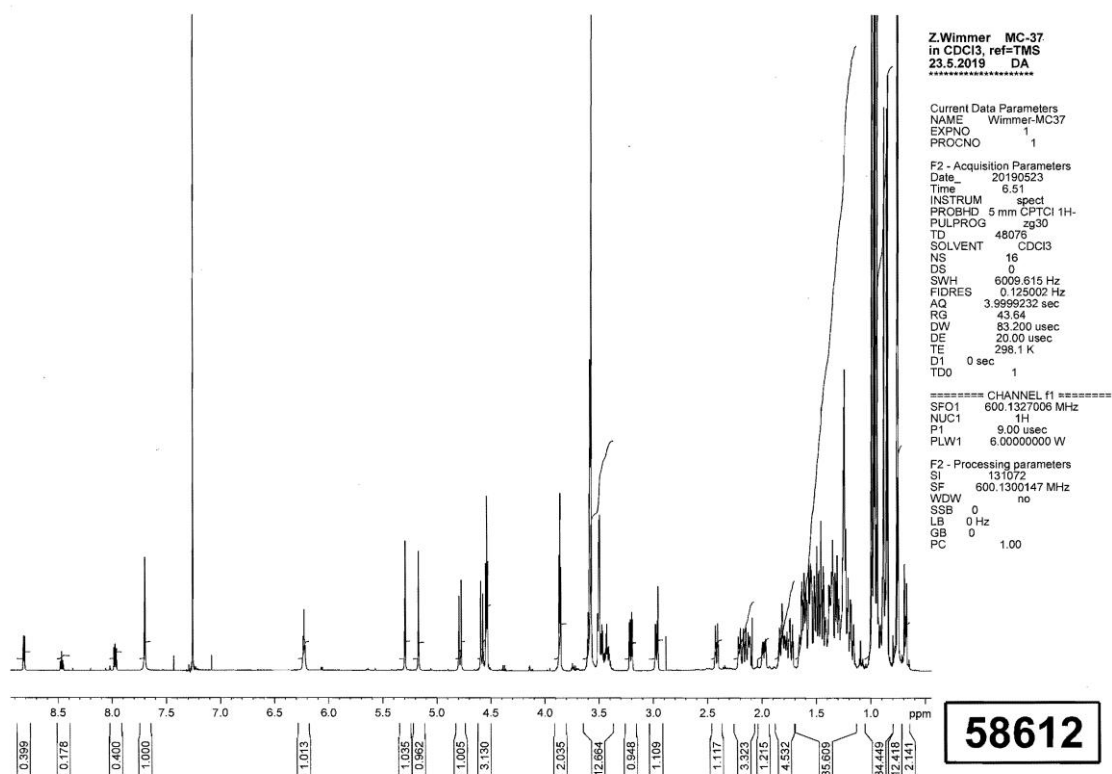



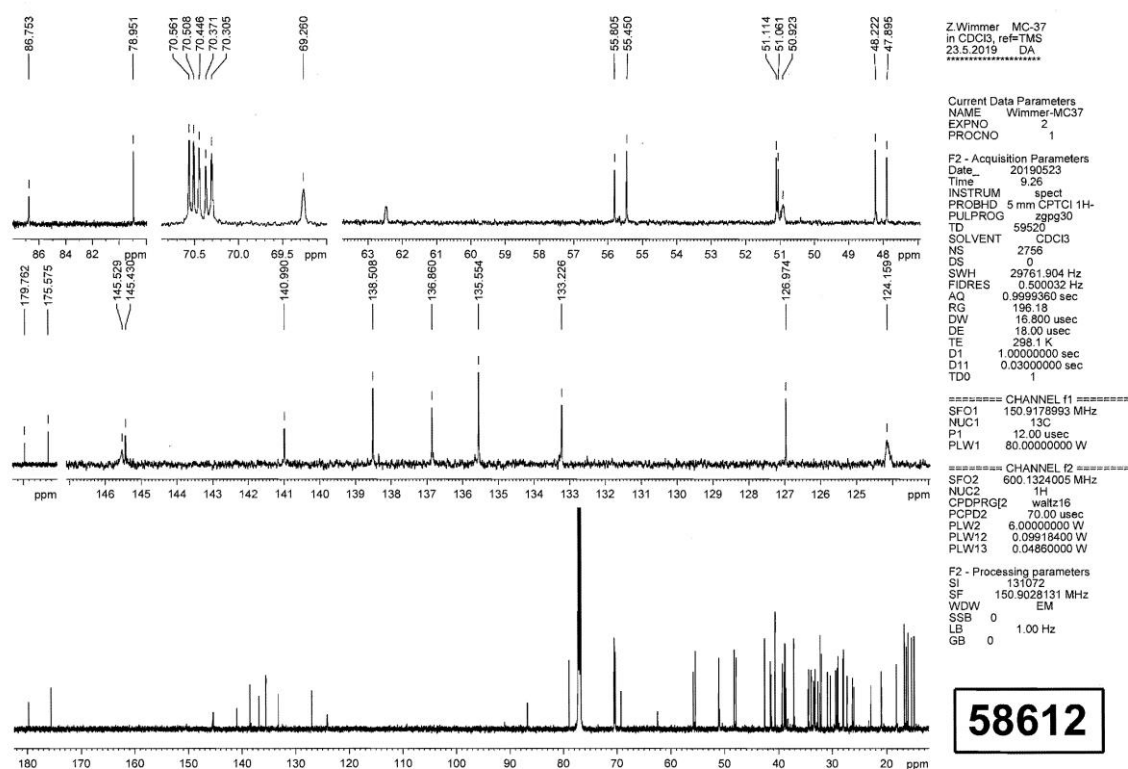

1.19. (3 $\beta$ )-28-[(2-{2-[2-(2-{4-[(3 $\beta$ )-28-[(2-{2-[2-(2-Azidoethoxy)ethoxy]ethoxy}ethyl)-amino]-28-oxoolean-18-en-3-yl}oxy)methyl]-1*H*-1,2,3-triazol-1-yl}ethoxy)ethoxy]ethoxy}-ethyl)amino]-28-oxoolean-18-en-3-yl acetate (**9b**)

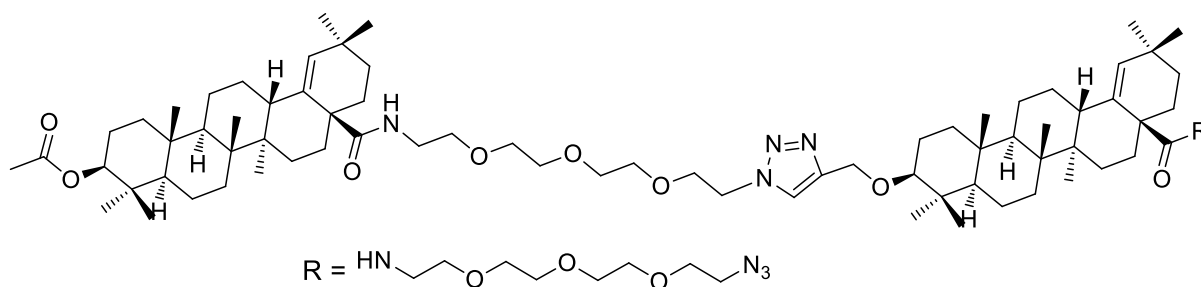

Procedure E was applied, using **7b** as the starting compound, yielding **9b** in a 50 % yield.

**<sup>1</sup>H NMR:**  $\delta$  0.69 (1H, dd,  $J_1=2.0$  Hz,  $J_2=11.3$  Hz, H5"), 0.75 (3H, d, H27"), 0.75 (3H, s, H27), 0.79 (1H, dd,  $J_1=1.8$  Hz,  $J_2=11.5$  Hz, H5), 0.83 (3H, s, H25), 0.83 (3H, s, H25"), 0.84 (3H, s, H23), 0.86 (3H, s, H24"), 0.88 (3H, s, H24), 0.89 (3H, s, H23"), 0.94 (3H, s, H26"), 0.94 (3H, s, H26), 0.98 (3H, s, H30"), 0.98 (3H, s, H30), 0.99 (3H, s, H29"), 1.01 (3H, s, H29), 1.75 (2H, dt,  $J_1=3.5$  Hz,  $J_2=3.5$  Hz,  $J_3=13.3$  Hz, H1), 1.79 (2H, dt,  $J_1=3.5$  Hz,  $J_2=3.5$  Hz,  $J_3=13.5$  Hz,

H1"), 2.10-2.14 (1H, m, H13"), 2.10-2.14 (1H, m, H13), 2.40 (2H, dt,  $J_1=3.3$  Hz,  $J_2=3.3$  Hz,  $J_3=13.5$  Hz, H16"), 2.41 (2H, dt,  $J_1=3.3$  Hz,  $J_2=3.3$  Hz,  $J_3=13.5$  Hz, H16), 2.99 (1H, dd,  $J_1=4.4$  Hz,  $J_2=11.8$  Hz, H3"), 3.37-3.40 (2H, m, H8\*), 3.39-3.45 (2H, m, H1'), 3.40-3.46 (2H, m, H1\*), 3.48-3.52 (2H, m, H1'), 3.58-3.63 (2H, m, H4\*), 3.58-3.63 (2H, m, H5\*), 3.58-3.63 (2H, m, H2\*), 3.58-3.63 (2H, m, H3\*), 3.58-3.63 (2H, m, H6\*), 3.58-3.63 (2H, m, H7\*), 3.60-3.68 (2H, m, H6'), 3.60-3.68 (2H, m, H4'), 3.60-3.68 (2H, m, H3'), 3.60-3.68 (2H, m, H5'), 3.60-3.68 (2H, m, H2'), 3.88-3.92 (2H, m, H7'), 4.47 (1H, dd,  $J_1=5.1$  Hz,  $J_2=11.3$  Hz, H3), 4.59-4.62 (2H, m, H8'), 4.68 (1H, d,  $J=13.1$  Hz, H11'), 4.90 (2H, d,  $J=13.1$  Hz, H11'), 5.31 (1H, dd,  $J_1=0.7$  Hz,  $J_2=1.7$  Hz, H19), 5.31 (1H, dd,  $J_1=0.8$  Hz,  $J_2=1.6$  Hz, H19"), 7.87 (2H, s, H9').

**$^{13}\text{C}$  NMR:**  $\delta$  14.89 (q, C27), 14.92 (q, C27"), 16.03 (q, C26"), 16.03 (q, C26), 16.29 (q, C25"), 16.50 (q, C25), 16.72 (q, C24"), 16.78 (q, C24), 18.06 (t, C6), 18.20 (t, C6"), 21.01 (t, C11"), 21.01 (t, C11), 22.70 (t, C2"), 23.63 (t, C2), 26.20 (t, C12"), 26.25 (t, C12), 27.88 (q, C23), 28.03 (q, C23"), 28.93 (q, C30), 28.93 (q, C30"), 29.31 (t, C15"), 29.33 (t, C15), 30.88 (q, C29"), 30.93 (q, C29), 32.28 (s, C20"), 32.29 (s, C20), 32.68 (t, C16"), 32.70 (t, C16), 33.20 (t, C21), 33.20 (t, C21"), 33.42 (t, C22"), 33.95 (t, C7), 33.95 (t, C7"), 34.38 (t, C22), 37.10 (s, C10), 37.14 (s, C10"), 37.78 (s, C8), 37.78 (s, C8"), 38.61 (t, C1'), 38.79 (t, C1), 39.33 (t, C1"), 39.35 (t, C1\*), 40.69 (s, C14"), 40.70 (s, C14), 41.54 (d, C13"), 41.56 (d, C13), 42.61 (s, C4"), 42.62 (s, C4), 48.21 (s, C17), 48.21 (s, C17"), 50.66 (t, C8\*), 51.03 (d, C9), 51.03 (d, C9"), 51.84 (t, C8'), 55.54 (d, C5), 55.76 (d, C5"), 61.49 (t, C11'), 68.84 (t, C7'), 70.06 (t, C3'), 70.08 (t, C7\*), 70.33 (t, C6\*), 70.35 (t, C5\*), 70.38 (t, C4\*), 70.45 (t, C3\*), 70.45 (t, C6'), 70.55 (t, C4'), 70.55 (t, C5'), 70.57 (t, C2\*), 70.64 (t, C2'), 80.82 (d, C3), 87.17 (d, C3"), 125.15 (d, C9'), 135.62 (d, C19), 135.62 (d, C19"), 138.40 (s, C18"), 138.43 (s, C18), 144.47 (s, C10'), 175.56 (s, C28"), 175.63 (s, C28).

**MS (ES):**  $m/z$  = 1394.6  $[\text{M}+\text{H}]^+$ ; 1392.6  $[\text{M}-\text{H}]^-$

1.20. Benzyl (3 $\beta$ )-3-[[1-(2-{2-[2-(2-{[(3 $\beta$ )-3-{[1-(2-{2-[2-(2-{[(3 $\beta$ )-3-(acetyloxy)-28-oxoolean-18-en-28-yl]amino}ethoxy}ethoxy}ethoxy}ethyl)-1*H*-1,2,3-triazol-4-yl]methoxy}-28-oxoolean-18-en-28-yl]amino}ethoxy}ethoxy}ethoxy}ethyl)-1*H*-1,2,3-triazol-4-yl]-methoxy}olean-18-en-28-oate (**10b**)

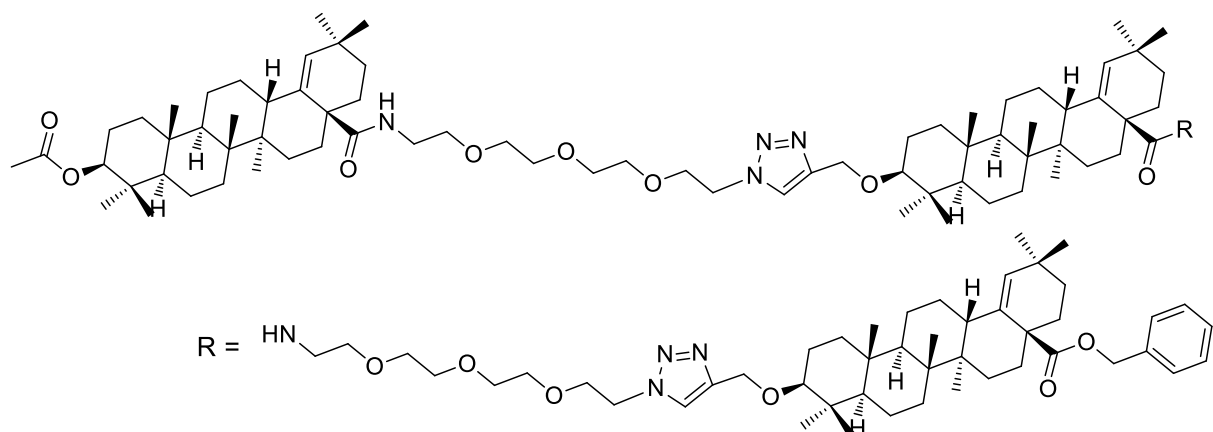

Procedure F was applied, using **9b** and **3b** as the starting compounds, yielding **10b** in a 98 % yield.

**<sup>1</sup>H NMR:**  $\delta$  0.66 (dd,  $J_1=2.0$  Hz,  $J_2=11.8$  Hz, H5"), 0.69 (dd,  $J_1=1.8$  Hz,  $J_2=11.6$  Hz, H5\*), 0.73 (s, H27), 0.75 (s, H25\*), 0.75 (s, H27"), 0.76 (s, H27\*), 0.79 (dd,  $J_1=1.8$  Hz,  $J_2=11.7$  Hz, H5), 0.82 (s, H25), 0.84 (s, H23), 0.85 (s, H23"), 0.87 (s, H24), 0.88 (s, H24\*), 0.88 (s, H24"), 0.94 (s, H23\*), 0.94 (s, H26"), 0.94 (s, H26), 0.96 (s, H25"), 0.96 (s, H26\*), 0.99 (s, H30), 0.99 (s, H30\*), 0.99 (s, H30"), 1.00 (s, H29\*), 1.00 (s, H29"), 1.00 (s, H29), 1.82 (ddd,  $J_1=3.7$  Hz,  $J_2=3.7$  Hz,  $J_3=3.7$  Hz, H1\*), 2.16 (dt,  $J_1=3.6$  Hz,  $J_2=3.6$  Hz,  $J_3=13.1$  Hz, H16\*), 2.41 (dt,  $J_1=3.6$  Hz,  $J_2=3.6$  Hz,  $J_3=13.3$  Hz, H16), 2.41 (dt,  $J_1=3.6$  Hz,  $J_2=3.6$  Hz,  $J_3=13.6$  Hz, H16"), 2.97 (dd,  $J_1=4.2$  Hz,  $J_2=11.5$  Hz, H3\*), 2.99 (dd,  $J_1=4.2$  Hz,  $J_2=11.8$  Hz, H3"), 3.37-3.44 (m, H1'), 3.37-3.44 (m, H1"), 3.46-3.52 (m, H1'), 3.46-3.52 (m, H1"), 4.47 (dd,  $J_1=5.2$  Hz,  $J_2=11.4$  Hz, H3), 4.67 (d,  $J=13.1$  Hz, H11'), 4.67 (d,  $J=13.1$  Hz, H11"), 4.88 (d,  $J=13.1$  Hz, H11'), 4.88 (d,  $J=13.1$  Hz, H11"), 5.09 (d,  $J=12.4$  Hz, H1\*\*), 5.12 (d,  $J=1.4$  Hz, H19\*), 5.16 (d,  $J=12.4$  Hz, H1\*\*), 5.31 (bs, H19), 5.31 (bs, H19"), 7.27-7.36 (m, H3\*\*), 7.84 (s, H9"), 7.85 (s, H9').

**<sup>13</sup>C NMR:**  $\delta$  14.90 (C27), 14.90 (C27"), 14.90 (C27\*), 15.80 (C26), 16.00 (C25), 16.00 (C26\*), 16.00 (C26"), 16.30 (C24"), 16.50 (C25\*), 16.70 (C24\*), 16.70 (C25"), 16.80 (C24), 18.10 (C6), 18.10 (C6"), 18.10 (C6\*), 20.90 (C11\*), 21.00 (C11"), 21.00 (C11), 22.70 (C2\*), 22.80 (C2"), 23.60 (C2), 25.90 (C12\*), 25.90 (C12"), 26.20 (C12), 27.90 (C23), 28.00 (C23"), 28.10 (C23\*), 28.60 (C8"), 28.90 (C30"), 28.90 (C30), 29.10 (C30\*), 29.30 (C15"), 29.30 (C15\*), 29.30 (C15), 30.40 (C29\*), 30.90 (C29"), 30.90 (C29), 32.00 (C20\*), 32.30 (C20), 32.30 (C21"), 32.70 (C21), 32.70 (C16"), 32.70 (C21\*), 33.20 (C7), 33.20 (C20"), 33.40 (C7\*), 33.40 (C16\*), 33.50 (C16), 34.00 (C7"), 34.40 (C22\*), 34.40 (C22"), 34.50 (C22), 37.10 (C10"), 37.10 (C10), 37.10 (C10\*), 37.80 (C8\*), 38.60 (C1\*), 38.80 (C8), 38.80 (C1"), 38.80 (C1),

39.30 (C1'''), 39.30 (C1'), 40.60 (C14''), 40.70 (C14\*), 40.70 (C14), 41.30 (C13\*), 41.60 (C13''), 41.60 (C13), 42.50 (C4''), 42.60 (C4\*), 42.60 (C4), 48.10 (C17\*), 48.20 (C17''), 48.20 (C17), 51.00 (C9), 51.00 (C9\*), 51.00 (C9''), 51.90 (C8'''), 51.90 (C8'), 55.60 (C5), 55.70 (C5''), 55.70 (C5\*), 61.40 (C11'''), 61.50 (C11'), 66.00 (C1\*\*), 68.80 (C7'), 68.80 (C7'''), 70.30 (C6'''), 70.30 (C6'), 70.50 (C5'''), 70.50 (C4'), 70.50 (C4'''), 70.50 (C5'), 70.60 (C2'), 70.60 (C3'''), 70.60 (C2'''), 70.60 (C3'), 80.80 (C3), 87.20 (C3''), 87.30 (C3\*), 125.20 (C9'''), 125.90 (C9'), 127.90 (C5\*\*), 128.00 (C4\*\*), 128.40 (C3\*\*), 132.50 (C19''), 135.60 (C19\*), 135.60 (C19), 136.50 (C2\*\*), 136.50 (C18\*), 137.10 (C18''), 138.40 (C18), 144.40 (C10'''), 144.50 (C10'), 175.60 (C28\*), 175.60 (C28''), 176.40 (C28).

**MS (ES):**  $m/z = 1979.4$   $[M+H]^+$

1.21. (3 $\beta$ )-3-{[1-(2-{2-[2-(2-{[(3 $\beta$ )-3-{[1-(2-{2-[2-(2-{[(3 $\beta$ )-3-(Acetyloxy)-28-oxoolean-18-en-28-yl]amino}ethoxy)ethoxy]ethoxy}ethyl)-1*H*-1,2,3-triazol-4-yl]methoxy}-28-oxoolean-18-en-28-yl]amino}ethoxy)ethoxy]ethoxy}ethyl)-1*H*-1,2,3-triazol-4-yl]methoxy}olean-18-en-28-oic acid (**11b**)

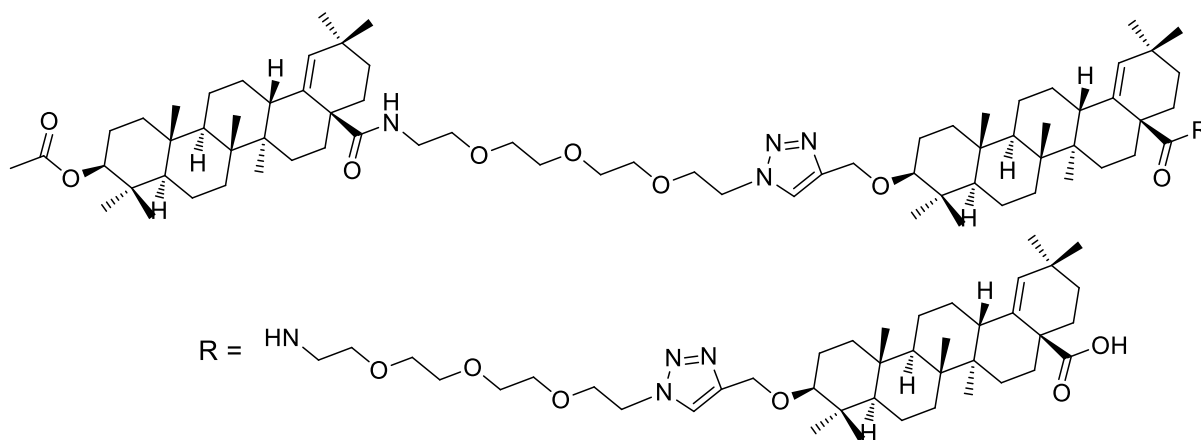

Procedure G was applied, using **10b** as the starting compound, yielding **11b** in an 80 % yield.

**<sup>1</sup>H NMR:**  $\delta$  0.68 (dd,  $J_1=2.0$  Hz,  $J_2=11.5$  Hz, H5''), 0.71 (dd,  $J_1=1.7$  Hz,  $J_2=11.8$  Hz, H5\*), 0.75 (s, H27''), 0.75 (s, H27), 0.77 (s, H27\*), 0.78 (s, H25\*), 0.79 (dd,  $J_1=1.8$  Hz,  $J_2=11.5$  Hz, H5), 0.83 (s, H25), 0.84 (s, H23), 0.85 (s, H23''), 0.87 (s, H26''), 0.87 (s, H24), 0.89 (s, H24\*), 0.91 (s, H24''), 0.93 (s, H23\*), 0.94 (s, H26), 0.94 (s, H25''), 0.97 (s, H26\*), 0.98 (s, H30''), 0.98 (s, H30\*), 0.98 (s, H30), 0.99 (s, H29), 0.99 (s, H29\*), 0.99 (s, H29''), 1.73 (dt,  $J_1=3.5$  Hz,  $J_2=3.5$  Hz,  $J_3=13.2$  Hz, H1), 1.82 (ddd,  $J_1=3.7$  Hz,  $J_2=4.7$  Hz,  $J_3=14.0$  Hz, H1\*), 2.17 (dt,  $J_1=3.5$  Hz,  $J_2=3.5$  Hz,  $J_3=13.4$  Hz, H16\*), 2.41 (dt,  $J_1=3.4$  Hz,  $J_2=3.4$  Hz,  $J_3=13.4$  Hz, H16), 2.41 (dt,

$J_1=3.4$  Hz,  $J_2=3.4$  Hz,  $J_3=13.4$  Hz, H16''), 2.97 (dd,  $J_1=4.2$  Hz,  $J_2=11.6$  Hz, H3\*), 2.99 (dd,  $J_1=4.4$  Hz,  $J_2=11.7$  Hz, H3''), 3.37-3.44 (m, H1'''), 3.37-3.44 (m, H1'), 3.47-3.52 (m, H1'), 3.47-3.52 (m, H1'''), 3.88 (bt,  $J=5.3$  Hz, H7''), 3.90 (bt,  $J=5.6$  Hz, H7'), 4.47 (dd,  $J_1=5.2$  Hz,  $J_2=11.3$  Hz, H3), 4.58-4.62 (m, H8''), 4.63-4.68 (m, H8'), 4.87 (d,  $J=12.6$  Hz, H11'), 4.87 (d,  $J=12.6$  Hz, H11'''), 4.91 (d,  $J=12.6$  Hz, H11'), 4.91 (d,  $J=12.6$  Hz, H11'''), 5.16 (bd,  $J=1.4$  Hz, H19\*), 5.31 (bs, H19''), 5.31 (bs, H19), 7.74 (bs, H9'), 7.84 (bs, H9'').

**$^{13}\text{C}$  NMR:**  $\delta$  14.90 (C27), 14.90 (C27\*), 14.90 (C27''), 16.00 (C26\*), 16.00 (C26''), 16.10 (C26), 16.30 (C25\*), 16.50 (C25), 16.50 (C25''), 16.70 (C24\*), 16.70 (C24''), 16.80 (C24), 18.10 (C6), 18.10 (C6''), 18.10 (C6\*), 20.90 (C11\*), 21.00 (C11), 21.00 (C11''), 21.30 (OAc), 22.60 (C2''), 22.70 (C2\*), 23.60 (C2), 25.90 (C12\*), 26.20 (C12''), 26.30 (C12), 27.90 (C23), 28.10 (C23\*), 28.10 (C23''), 28.90 (C30''), 28.90 (C30), 29.10 (C30\*), 29.30 (C15''), 29.30 (C15\*), 29.40 (C15), 30.40 (C29\*), 30.90 (C29), 30.90 (C29''), 32.10 (C20\*), 32.30 (C20), 32.30 (C16), 32.30 (C16''), 32.30 (C21''), 32.70 (C21\*), 33.20 (C20''), 33.20 (C21), 33.40 (C7\*), 33.90 (C7), 33.90 (C16\*), 34.40 (C22''), 34.40 (C22), 34.40 (C7''), 34.50 (C22\*), 37.10 (C10''), 37.10 (C10), 37.10 (C10\*), 37.80 (C8\*), 37.80 (C8), 38.50 (C8''), 38.60 (C1\*), 38.80 (C1), 38.80 (C1''), 39.30 (C1'''), 39.40 (C1'), 40.70 (C14), 40.70 (C14\*), 40.70 (C14''), 41.30 (C13\*), 41.60 (C13''), 41.60 (C13), 42.60 (C4), 42.60 (C4''), 42.60 (C4\*), 47.90 (C17\*), 48.20 (C17), 48.20 (C17''), 51.00 (C9''), 51.00 (C9), 51.00 (C9\*), 52.50 (C8'''), 52.60 (C8'), 55.50 (C5''), 55.50 (C5), 55.70 (C5\*), 60.80 (C11''), 61.00 (C11'), 68.50 (C7'''), 68.70 (C7'), 70.30 (C6'''), 70.40 (C4'''), 70.40 (C6'), 70.40 (C5'''), 70.50 (C5'), 70.60 (C3'''), 70.60 (C2'''), 70.60 (C3'), 70.60 (C4'), 70.70 (C2'), 80.80 (C3), 87.50 (C3''), 87.80 (C3\*), 125.80 (C9'''), 125.90 (C9'), 133.00 (C19\*), 135.60 (C19''), 135.70 (C19), 137.00 (C18\*), 138.40 (C18''), 138.40 (C18), 143.60 (C10'''), 143.90 (C10'), 171.10 (OAc), 175.60 (C28''), 175.80 (C28), 178.90 (C28\*).

**MS (ES):**  $m/z$  = 1894.4  $[\text{M}+\text{H}]^+$ ; 1893.0  $[\text{M}-\text{H}]^-$

1.22. (3 $\beta$ )-3-{[1-(2-{2-[2-(2-{[(3 $\beta$ )-3-{[1-(2-{2-[2-(2-{[(3 $\beta$ )-3-Hydroxy-28-oxoolean-18-en-28-yl]amino}ethoxy)ethoxy]ethoxy}ethyl)-1*H*-1,2,3-triazol-4-yl]methoxy}-28-oxoolean-18-en-28-yl]amino}ethoxy)ethoxy]ethoxy}ethyl)-1*H*-1,2,3-triazol-4-yl]methoxy}olean-18-en-28-oic acid (**12b**)



(C8), 39.30 (C1'''), 39.40 (C1'), 40.70 (C14''), 40.70 (C14\*), 40.70 (C14), 41.00 (C11'), 41.30 (C13\*), 41.60 (C13''), 42.60 (C4\*), 42.60 (C4''), 42.60 (C4), 42.60 (C13), 47.90 (C17\*), 48.20 (C17''), 48.20 (C17), 51.00 (C9\*), 51.00 (C9''), 51.10 (C9), 52.60 (C8'), 52.70 (C8'''), 55.40 (C5), 55.70 (C5\*), 55.70 (C5''), 60.80 (C11'''), 68.60 (C7'), 68.60 (C7'''), 70.30 (C6'''), 70.30 (C5'), 70.30 (C6'), 70.30 (C5'''), 70.40 (C4'''), 70.40 (C4'), 70.60 (C2'), 70.60 (C3'''), 70.60 (C3'), 70.70 (C2'''), 78.90 (C3), 87.50 (C3''), 87.80 (C3\*), 126.00 (C9'), 126.10 (C9'''), 133.00 (C19\*), 135.60 (C19''), 135.70 (C19), 137.00 (C18\*), 138.40 (C18''), 138.40 (C18), 143.70 (C10'''), 143.70 (C10'), 175.60 (C28''), 175.80 (C28), 178.80 (C28\*).

**MS (ES):**  $m/z$  = 1851.6  $[M+H]^+$ ; 1949.3  $[M-H]^-$

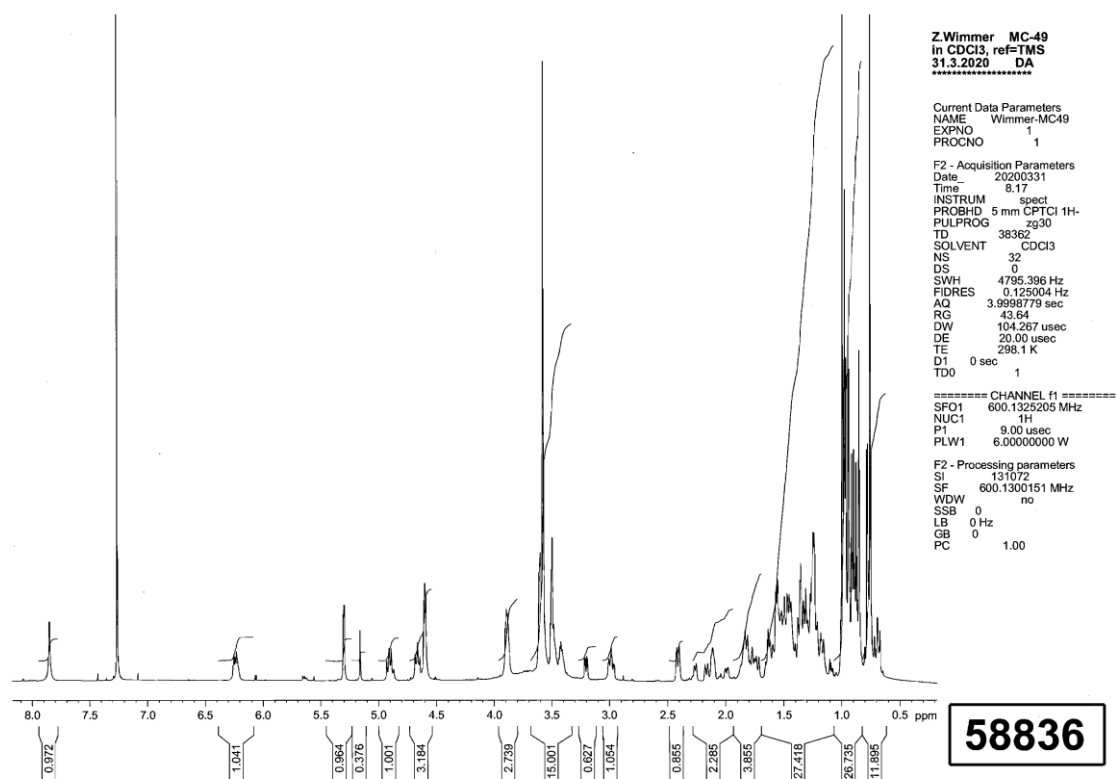

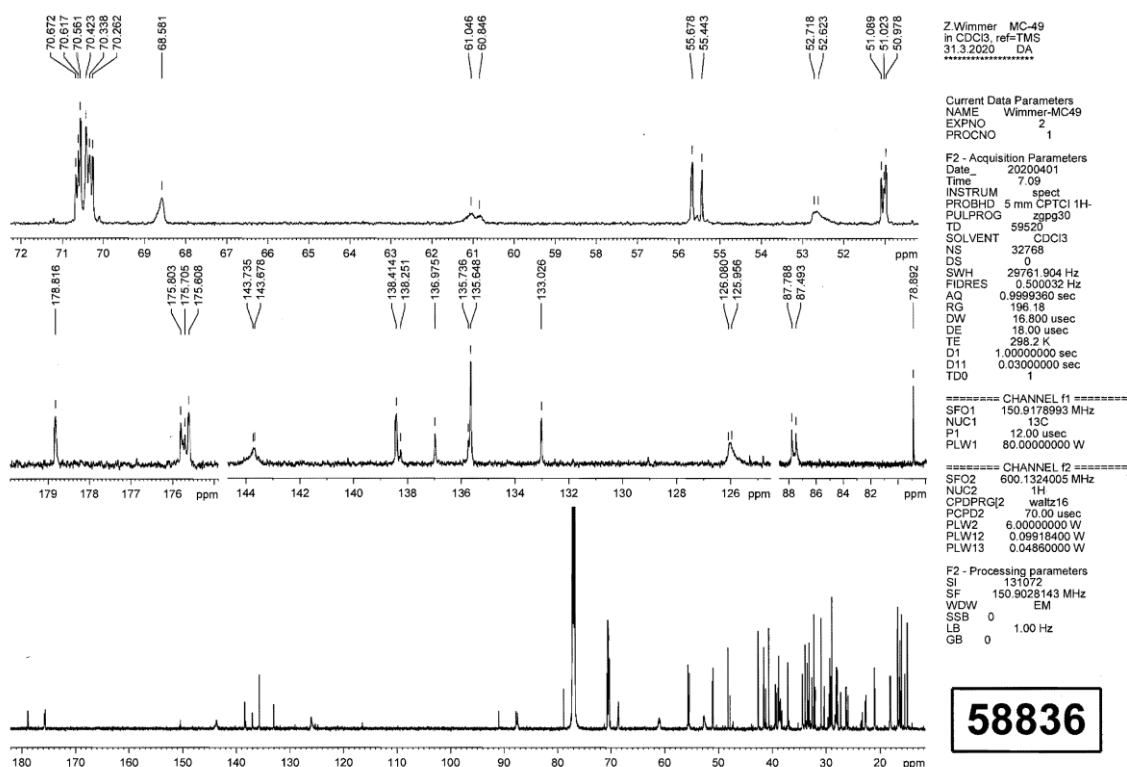

### 1.23. Prop-2-yn-1-yl-3-oxoolean-18-en-28-oate (**2c**)

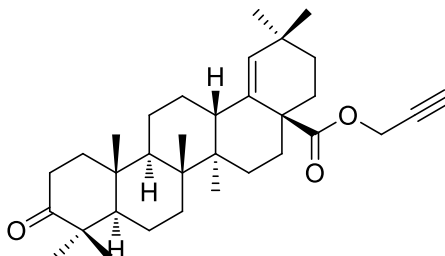

Procedure D was applied, using **1c** as the starting compound, yielding **2c** in an 86 % yield.

**<sup>1</sup>H NMR:** δ 0.78 (3H, s, H<sub>27</sub>), 0.94 (3H, d, *J*=0.9 Hz, H<sub>25</sub>), 0.96 (3H, s, H<sub>30</sub>), 0.99 (3H, s, H<sub>29</sub>), 1.00 (3H, bs, H<sub>26</sub>), 1.02 (3H, s, H<sub>24</sub>), 1.07 (3H, s, H<sub>23</sub>), 1.22 (2H, dt, *J*<sub>1</sub>=3.3 Hz, *J*<sub>2</sub>=3.3 Hz, *J*<sub>3</sub>=13.3 Hz, H<sub>15</sub>), 1.25 (2H, dt, *J*<sub>1</sub>=3.8 Hz, *J*<sub>2</sub>=11.5 Hz, *J*<sub>3</sub>=11.5 Hz, H<sub>12</sub>), 1.64 (2H, dq, *J*<sub>1</sub>=3.0 Hz, *J*<sub>2</sub>=3.0 Hz, *J*<sub>3</sub>=3.0 Hz, *J*<sub>4</sub>=12.2 Hz, H<sub>12</sub>), 1.94 (2H, ddd, *J*<sub>1</sub>=3.3 Hz, *J*<sub>2</sub>=6.0 Hz, *J*<sub>3</sub>=13.7 Hz, H<sub>22</sub>), 1.96 (2H, ddd, *J*<sub>1</sub>=4.8 Hz, *J*<sub>2</sub>=7.6 Hz, *J*<sub>3</sub>=13.3 Hz, H<sub>1</sub>), 2.20 (2H, ddd, *J*<sub>1</sub>=3.0 Hz, *J*<sub>2</sub>=3.8 Hz, *J*<sub>3</sub>=13.7 Hz, H<sub>22</sub>), 2.20 (1H, ddd, *J*<sub>1</sub>=1.8 Hz, *J*<sub>2</sub>=3.5 Hz, *J*<sub>3</sub>=11.0 Hz, H<sub>13</sub>), 2.42 (1H, t, *J*=2.5 Hz, H<sub>3'</sub>), 2.44 (2H, ddd, *J*<sub>1</sub>=4.8 Hz, *J*<sub>2</sub>=8.0 Hz, *J*<sub>3</sub>=15.7 Hz, H<sub>2</sub>), 2.49 (2H, ddd,



$J_1=7.6$  Hz,  $J_2=9.1$  Hz,  $J_3=15.7$  Hz, H2), 4.68 (2H, dd,  $J_1=2.5$  Hz,  $J_2=15.4$  Hz, H1'), 4.70 (2H, dd,  $J_1=2.5$  Hz,  $J_2=15.4$  Hz, H1'), 5.14 (1H, ddd,  $J_1=0.7$  Hz,  $J_2=1.8$  Hz, H19).

**$^{13}\text{C}$  NMR:**  $\delta$  14.88 (q, C27), 15.81 (q, C26), 16.51 (q, C25), 19.60 (t, C6), 20.91 (q, C24), 21.49 (t, C11), 25.97 (t, C12), 26.84 (q, C23), 29.09 (q, C30), 29.29 (t, C15), 30.33 (q, C29), 32.01 (t, C21), 33.26 (s, C20), 33.41 (t, C22), 33.41 (t, C16), 33.78 (t, C7), 34.05 (t, C2), 36.89 (s, C10), 39.83 (t, C1), 40.61 (s, C8), 41.37 (d, C13), 42.53 (s, C14), 47.25 (s, C4), 48.10 (s, C17), 50.44 (d, C9), 51.83 (t, C1'), 54.86 (d, C5), 74.28 (d, C3'), 78.08 (s, C2'), 132.95 (d, C19), 136.60 (s, C18), 175.77 (s, C28), 218.25 (s, C3).

**MS (ES):**  $m/z = 493.2$   $[\text{M}+\text{H}]^+$

1.24. *N*-(2-{2-[2-(2-Azidoethoxy)ethoxy]ethoxy}ethyl)-3-oxoolean-18-en-28-amide (**3c**)

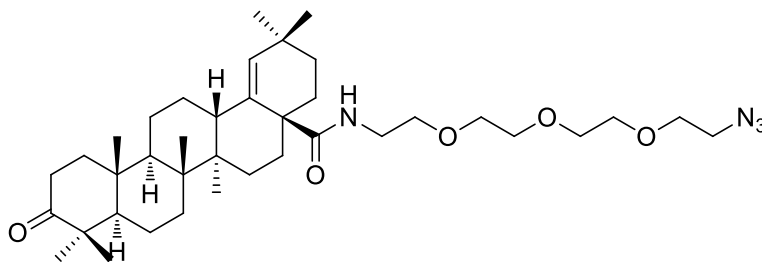

Procedure E was applied, using **1c** as the starting compound, yielding **3c** in a 90 % yield.

**$^1\text{H}$  NMR:**  $\delta$  0.77 (3H, d, H27), 0.94 (3H, s,  $J=0.8$  Hz, H25), 0.97 (3H, s, H30), 0.97 (3H, bs, H29), 1.00 (3H, s, H26), 1.02 (3H, ddd, H24), 1.07 (3H, ddd, H23), 1.19 (2H, dq,  $J_1=3.5$  Hz,  $J_2=3.5$  Hz,  $J_3=13.0$  Hz, H15), 1.84 (2H, ddd,  $J_1=3.4$  Hz,  $J_2=5.0$  Hz,  $J_3=13.8$  Hz, H22), 1.95 (2H, ddd,  $J_1=5.0$  Hz,  $J_2=7.5$  Hz,  $J_3=13.0$  Hz, H1), 2.15 (1H, dt,  $J_1=1.7$  Hz,  $J_2=3.4$  Hz,  $J_3=11.9$  Hz, H13), 2.43 (2H, ddd,  $J_1=3.0$  Hz,  $J_2=3.4$  Hz,  $J_3=13.5$  Hz, H16), 2.45 (2H, ddd,  $J_1=5.0$  Hz,  $J_2=8.2$  Hz,  $J_3=15.7$  Hz, H2), 2.49 (2H, ddd,  $J_1=7.5$  Hz,  $J_2=9.0$  Hz,  $J_3=15.7$  Hz, H2), 3.36-3.40 (2H, m, H8'), 3.41-3.53 (2H, m, H1'), 3.58-3.69 (2H, m, H5'), 3.58-3.69 (2H, m, H6'), 3.58-3.69 (2H, m, H7'), 3.58-3.69 (2H, m, H3'), 3.58-3.69 (2H, m, H4'), 3.58-3.69 (2H, m, H2'), 5.31 (1H, dt,  $J_1=0.8$  Hz,  $J_2=1.7$  Hz, H19), 6.25 (OH, 5.9, H1'-NH).

**$^{13}\text{C}$  NMR:**  $\delta$  14.80 (q, C27), 15.85 (q, C26), 16.56 (q, C25), 19.59 (t, C6), 20.88 (q, C24), 21.56 (t, C11), 24.22 (t, C12), 26.86 (q, C23), 28.96 (q, C30), 29.29 (t, C15), 30.86 (q, C29), 32.28 (t, C21), 32.63 (t, C16), 33.17 (s, C20), 33.66 (t, C22), 33.92 (t, C7), 34.00 (t, C2), 36.87 (s, C10), 39.35 (t, C1'), 39.82 (t, C1), 40.55 (s, C8), 41.63 (d, C13), 42.62 (s, C14), 47.23 (s, C4),

48.19 (s, C17), 50.40 (d, C9), 50.65 (t, C8'), 54.80 (d, C5), 70.06 (t, C7'), 70.33 (t, C6'), 70.36 (t, C5'), 70.55 (t, C4'), 70.62 (t, C3'), 70.69 (t, C2'), 135.69 (d, C19), 138.32 (s, C18), 175.47 (s, C28), 218.17 (s, C3).

**MS (ES):**  $m/z$  = 655.3  $[M+H]^+$ ; 653.2  $[M-H]^-$

1.25. [1-(2-{2-[2-(2-{[3,28-Dioxoolean-18-en-28-yl]amino}ethoxy)ethoxy]ethoxy}ethyl)-1*H*-1,2,3-triazol-4-yl)methyl 3-oxoolean-18-en-28-oate (**4c**)

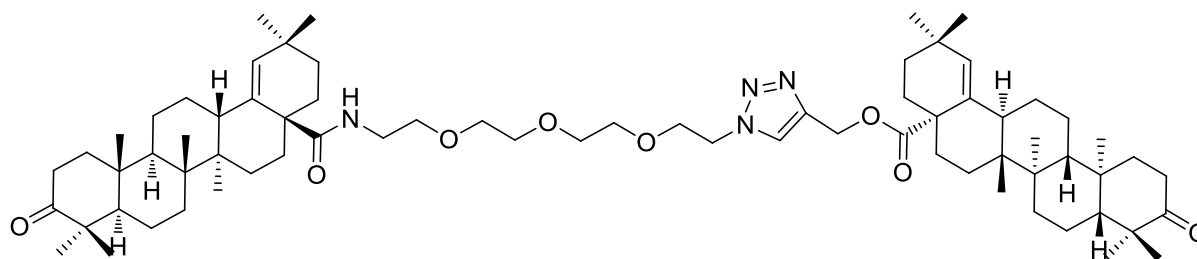

Procedure F was applied, using **2c** and **3c** as the starting compound, yielding **4c** in a 99 % yield.

**<sup>1</sup>H NMR:**  $\delta$  0.77 (3H, s, H27"), 0.79 (3H, s, H26), 0.81 (3H, s, H25), 0.94 (3H, s, H25"), 0.96 (3H, s, H29"), 0.96 (3H, s, H24), 0.97 (3H, s, H30"), 1.00 (3H, s, H26"), 1.00 (3H, s, H29), 1.02 (3H, s, H27), 1.04 (3H, s, H23), 1.04 (3H, s, H24"), 1.08 (3H, s, H23"), 1.10 (3H, s, H22), 1.86 (2H, ddd,  $J_1=3.5$  Hz,  $J_2=4.7$  Hz,  $J_3=13.9$  Hz, H22"), 1.89 (2H, dt,  $J_1=4.6$  Hz,  $J_2=4.6$  Hz,  $J_3=13.8$  Hz, H19), 1.97 (2H, ddd,  $J_1=4.8$  Hz,  $J_2=7.2$  Hz,  $J_3=12.7$  Hz, H1"), 1.98 (2H, ddd,  $J_1=4.8$  Hz,  $J_2=7.2$  Hz,  $J_3=12.7$  Hz, H30), 2.43-2.48 (2H, m, H16"), 2.43-2.48 (2H, m, H1), 3.40-3.46 (2H, m, H1'), 3.50-3.63 (2H, m, H3'), 3.50-3.63 (2H, m, H5'), 3.50-3.63 (2H, m, H2'), 3.50-3.63 (2H, m, H6'), 3.50-3.55 (2H, m, H1'), 3.50-3.63 (2H, m, H4'), 3.88 (2H, t,  $J=5.4$  Hz, H7'), 4.54 (2H, ddd,  $J_1=4.6$  Hz,  $J_2=5.4$  Hz, H8'), 5.13 (1H, bd,  $J=1.5$  Hz, H16), 5.23 (2H, s, H11'), 5.33 (1H, bs, H19"), 6.24 (1H, t,  $J=5.6$  Hz, H1'-NH), 7.78 (1H, s, H9').

**<sup>13</sup>C NMR:**  $\delta$  14.83 (q, C27), 14.87 (q, C27"), 15.41 (q, C26"), 15.89 (q, C26), 16.55 (q, C25), 16.61 (q, C25"), 19.60 (t, C6), 19.62 (t, C6"), 20.91 (q, C24), 20.93 (q, C24"), 21.45 (t, C11"), 21.59 (t, C11), 25.91 (t, C12"), 26.28 (t, C12), 26.86 (q, C23), 26.91 (q, C23"), 28.97 (q, C30), 29.06 (q, C30"), 29.28 (t, C15), 29.31 (t, C15"), 30.43 (q, C29"), 30.93 (q, C29), 32.01 (t, C21"), 32.31 (t, C21), 32.64 (t, C16"), 32.64 (t, C16), 33.21 (s, C20), 33.25 (s, C20"), 33.37 (t, C22), 33.43 (t, C22"), 33.68 (t, C7), 33.68 (t, C7"), 34.02 (t, C2), 34.03 (t, C2"), 36.88 (s, C10), 36.90 (s, C10"), 39.37 (t, C1'), 39.81 (t, C1), 39.86 (t, C1"), 40.46 (s, C8"), 40.58 (s, C8), 41.31 (d,

C13"), 41.68 (d, C13), 42.47 (s, C14"), 42.67 (s, C14), 47.07 (s, C17"), 47.24 (s, C4), 47.25 (s, C4"), 48.23 (s, C17), 50.37 (t, C8'), 50.37 (d, C9"), 50.42 (d, C9), 54.81 (d, C5), 54.81 (d, C5"), 57.41 (t, C11'), 69.38 (t, C7'), 70.30 (t, C5'), 70.32 (t, C6'), 70.51 (t, C4'), 70.54 (t, C3'), 70.57 (t, C2'), 125.17 (d, C9'), 132.88 (d, C19"), 135.68 (d, C19), 136.72 (s, C18"), 138.40 (s, C18), 142.85 (s, C10'), 175.50 (s, C28), 176.55 (s, C28"), 218.12 (s, C3), 218.36 (s, C3").

**MS (ES):**  $m/z$  = 1147.7 [M+H]<sup>+</sup>; 1145.7 [M-H]<sup>-</sup>

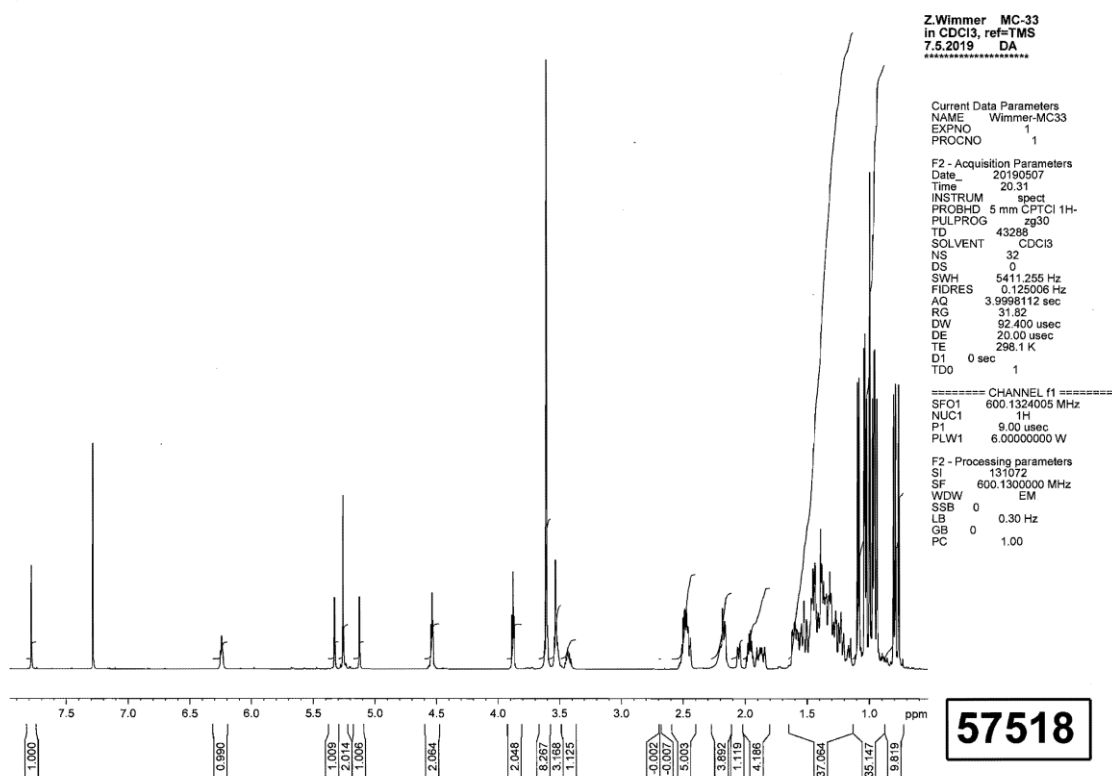

**57518**

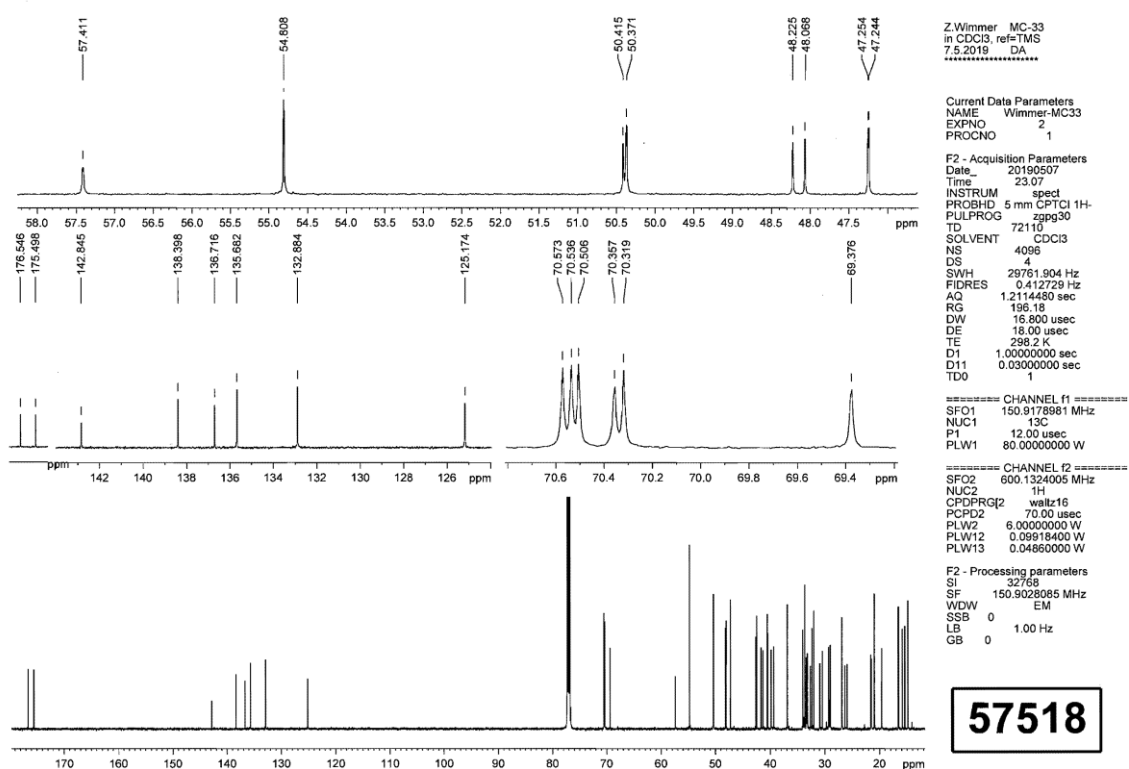

1.26. Benzyl (3 $\beta$ )-3-[[1-(2-{2-[2-(2-{[3,28-dioxoolean-18-en-28-yl]amino}ethoxy)ethoxy]-ethoxy}ethyl)-1H-1,2,3-triazol-4-yl]methoxy}olean-12-en-28-oate (**5c**)

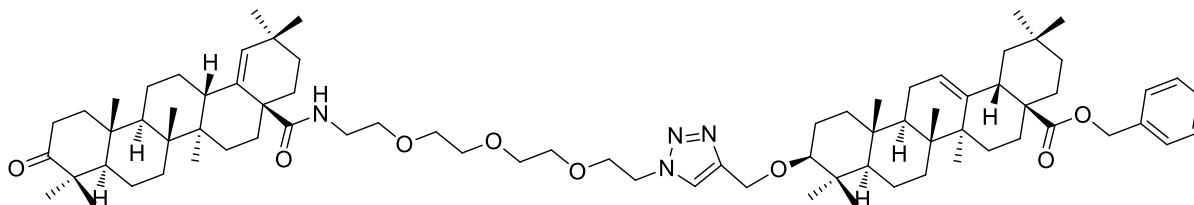

Procedure F was applied, using **3c** and **1a** as the starting compounds, yielding **5c** in a 99 % yield.

**<sup>1</sup>H NMR:**  $\delta$  0.59 (3H, s, H26"), 0.71 (1H, dd,  $J_1=1.9$  Hz,  $J_2=11.7$  Hz, H5"), 0.77 (3H, s, H27), 0.77 (3H, s, H25"), 0.87 (3H, s, H24"), 0.90 (3H, s, H29"), 0.90 (3H, s, H23"), 0.91 (3H, s, H30"), 0.93 (3H, d,  $J=0.5$  Hz, H25), 0.97 (3H, s, H26), 0.97 (3H, s, H30), 1.00 (3H, s, H29), 1.02 (3H, s, H24), 1.07 (3H, s, H23), 1.11 (3H, d,  $J=0.6$  Hz, H27"), 1.81-1.86 (2H, m, H2"), 1.83 (2H, ddd,  $J_1=3.3$  Hz,  $J_2=5.0$  Hz,  $J_3=13.0$  Hz, H22), 1.95 (2H, ddd,  $J_1=5.1$  Hz,  $J_2=7.4$  Hz,  $J_3=12.8$  Hz, H1), 2.13-2.13 (2H, m, H13), 2.43-2.52 (3H, m, H2), 2.90 (2H, bdd,  $J_1=4.2$  Hz,  $J_2=13.9$  Hz, H18"), 2.98 (1H, bdd,  $J_1=4.3$  Hz,  $J_2=11.7$  Hz, H3"), 3.37-3.43 (2H, m, H1'), 3.48-

3.62 (2H, m, H5'), 3.48-3.62 (2H, m, H6'), 3.48-3.52 (2H, m, H1'), 3.48-3.62 (2H, m, H4'), 3.48-3.62 (2H, m, H2'), 3.48-3.62 (2H, m, H3'), 3.88 (2H, t,  $J=5.2$  Hz, H7'), 4.55-4.58 (2H, m, H8'), 4.62 (2H, d,  $J=12.9$  Hz, H11'), 4.83 (2H, d,  $J=12.9$  Hz, H11'), 5.04 (2H, d,  $J=12.6$  Hz, H1\*), 5.09 (2H, d,  $J=12.6$  Hz, H1\*), 5.28 (2H, t,  $J=3.8$  Hz, H12"), 5.30 (2H, dd,  $J_1=0.7$  Hz,  $J_2=1.8$  Hz, H19), 7.28-7.40 (1H, m, H4\*), 7.28-7.40 (1H, m, H5\*), 7.28-7.40 (1H, m, H3\*), 7.77 (1H, s, H9').

**$^{13}\text{C}$  NMR:**  $\delta$  14.80 (q, C27), 15.31 (q, C24"), 15.86 (q, C26), 16.47 (q, C25"), 16.58 (q, C25), 16.87 (q, C26"), 18.23 (s, C6"), 19.58 (t, C6), 20.88 (q, C24), 21.55 (t, C11), 22.39 (d, C2"), 22.59 (t, C16"), 23.02 (t, C11"), 23.62 (q, C30"), 25.86 (q, C27"), 26.25 (t, C12), 26.86 (q, C23), 27.59 (t, C15"), 28.16 (q, C23"), 28.93 (q, C30), 29.27 (t, C15), 30.30 (q, C29), 30.68 (s, C20"), 32.28 (t, C21), 32.35 (t, C22"), 32.66 (d, C7"), 33.08 (q, C29"), 33.17 (s, C20), 33.65 (t, C22), 33.65 (t, C7), 33.83 (t, C21"), 33.93 (t, C16), 33.98 (t, C2), 36.86 (s, C10), 36.92 (s, C10"), 38.14 (t, C1"), 38.67 (t, C4"), 39.28 (s, C8"), 39.35 (t, C1'), 39.83 (t, C1), 40.55 (s, C8), 41.35 (d, C18"), 41.65 (s, C14"), 41.65 (d, C13), 42.63 (s, C14), 45.82 (t, C19"), 46.72 (s, C17"), 47.22 (s, C4), 47.51 (d, C9"), 48.20 (s, C17), 50.38 (d, C9), 51.16 (t, C8'), 54.78 (d, C5), 55.50 (t, C5"), 62.22 (t, C11'), 65.89 (t, C1\*), 69.16 (t, C7'), 70.13 (t, C5'), 70.27 (t, C6'), 70.44 (t, C4'), 70.50 (t, C3'), 70.56 (t, C2'), 86.99 (s, C3"), 122.45 (d, C12"), 124.36 (d, C9'), 127.87 (d, C5\*), 127.93 (d, C4\*), 128.38 (d, C3\*), 135.67 (d, C19), 136.41 (s, C2\*), 138.34 (s, C18), 143.65 (s, C13"), 145.18 (s, C10'), 175.52 (s, C28), 177.45 (s, C28"), 218.14 (s, C3).

**MS (ES):**  $m/z$  = 1240.4  $[\text{M}+\text{H}]^+$ ; 1238.8  $[\text{M}-\text{H}]^-$

1.27. Benzyl (3 $\beta$ )-3-[[1-(2-{2-[2-(2-{[3,28-dioxoolean-18-en-28-yl]amino}ethoxy)ethoxy]-ethoxy}ethyl)-1*H*-1,2,3-triazol-4-yl]methoxy}olean-18-en-28-oate (**5d**)

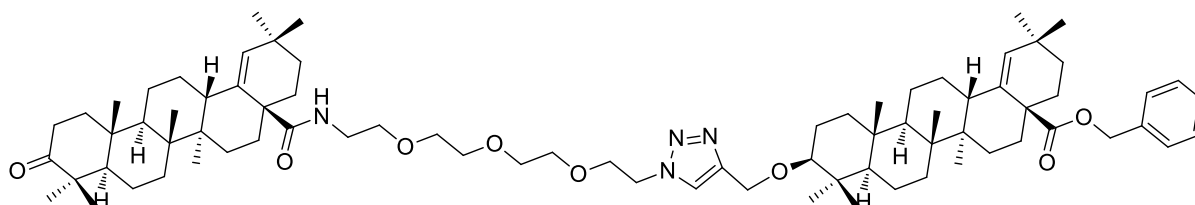

Procedure F was applied, using **3c** and **1b** as the starting compounds, yielding **5d** in a 99 % yield.

**<sup>1</sup>H NMR:** δ 0.69 (1H, dd,  $J_1=1.9$  Hz,  $J_2=11.2$  Hz, H5''), 0.76 (3H, s, H27), 0.77 (3H, s, H26''), 0.77 (3H, s, H25''), 0.79 (3H, s, H27''), 0.85 (3H, s, H24''), 0.91 (3H, s, H23''), 0.96 (3H, d,  $J=0.6$  Hz, H25), 0.98 (3H, s, H29''), 0.99 (3H, s, H26), 1.00 (3H, s, H30), 1.00 (3H, s, H30''), 1.02 (3H, s, H29), 1.04 (3H, s, H24), 1.09 (3H, s, H23), 1.78 (2H, dt,  $J_1=3.7$  Hz,  $J_2=3.7$  Hz,  $J_3=13.2$  Hz, H1''), 1.85 (2H, ddd,  $J_1=3.5$  Hz,  $J_2=5.0$  Hz,  $J_3=13.9$  Hz, H22), 1.94 (2H, ddd,  $J_1=3.3$  Hz,  $J_2=6.1$  Hz,  $J_3=13.8$  Hz, H7''), 1.97 (2H, ddd,  $J_1=5.2$  Hz,  $J_2=7.3$  Hz,  $J_3=13.0$  Hz, H1), 2.05 (1H, ddd,  $J_1=1.7$  Hz,  $J_2=3.5$  Hz,  $J_3=11.9$  Hz, H13''), 2.16 (1H, ddd,  $J_1=1.8$  Hz,  $J_2=3.3$  Hz,  $J_3=11.5$  Hz, H13), 2.18 (2H, ddd,  $J_1=3.2$  Hz,  $J_2=3.7$  Hz,  $J_3=13.5$  Hz, H16''), 2.47 (2H, ddd,  $J_1=5.6$  Hz,  $J_2=8.4$  Hz,  $J_3=15.7$  Hz, H2), 2.51 (2H, ddd,  $J_1=7.3$  Hz,  $J_2=8.4$  Hz,  $J_3=15.7$  Hz, H2), 3.01 (1H, dd,  $J_1=4.4$  Hz,  $J_2=11.8$  Hz, H3''), 3.28-3.43 (2H, m, H1'), 3.52-3.65 (2H, m, H6'), 3.52-3.65 (2H, m, H4'), 3.52-3.65 (2H, m, H5'), 3.52-3.65 (2H, m, H3'), 3.52-3.55 (2H, m, H1'), 3.52-3.65 (2H, m, H2'), 3.94 (2H, t,  $J=5.2$  Hz, H7'), 4.64-4.66 (2H, m, H8'), 4.73 (2H, d,  $J=13.4$  Hz, H11'), 4.95 (2H, d,  $J=13.4$  Hz, H11'), 5.11 (2H, d,  $J=12.4$  Hz, H1\*), 5.14 (1H, dd,  $J_1=0.6$  Hz,  $J_2=1.8$  Hz, H19''), 5.19 (2H, d,  $J=12.4$  Hz, H1\*), 5.33 (1H, dd,  $J_1=0.6$  Hz,  $J_2=1.8$  Hz, H19), 7.29-7.37 (1H, m, H4\*), 7.29-7.37 (1H, m, H5\*), 7.29-7.37 (1H, m, H3\*), 7.93 (1H, s, H9').

**<sup>13</sup>C NMR:** δ 14.81 (q, C27), 14.92 (q, C27''), 15.81 (q, C26''), 15.86 (q, C26), 16.28 (qq, C25''), 16.59 (q, C25), 16.65 (q, C24''), 18.10 (t, C6''), 19.58 (t, C6), 20.88 (t, C11''), 20.88 (q, C24), 21.56 (t, C11), 22.72 (t, C2''), 25.91 (t, C12''), 26.26 (t, C12), 26.88 (q, C23), 28.07 (q, C23''), 28.93 (q, C30), 29.14 (q, C30''), 29.27 (t, C15), 29.27 (t, C15''), 30.34 (q, C29''), 30.91 (q, C29), 31.98 (s, C20''), 32.29 (t, C21), 32.61 (t, C21''), 33.17 (s, C20), 33.34 (t, C7''), 33.42 (t, C7), 33.45 (t, C16''), 33.65 (t, C22), 33.94 (t, C16), 33.98 (t, C2), 34.47 (t, C22''), 36.87 (s, C10), 37.10 (s, C10''), 38.51 (t, C1''), 38.80 (s, C8''), 39.38 (t, C1'), 39.83 (t, C1), 40.55 (s, C8), 40.59 (s, C14''), 41.29 (d, C13''), 41.67 (d, C13), 42.47 (s, C4''), 42.64 (s, C14), 47.23 (s, C4), 48.13 (s, C17''), 48.20 (s, C17), 50.38 (d, C9), 51.01 (d, C9''), 52.33 (t, C8'), 54.77 (d, C5), 55.70 (d, C5''), 61.11 (t, C11'), 66.02 (t, C1\*), 68.63 (t, C7'), 70.24 (t, C6'), 70.30 (t, C5'), 70.43 (t, C4'), 70.54 (t, C3'), 70.60 (t, C2'), 87.58 (d, C3''), 125.55 (d, C9'), 127.92 (d, C5\*), 128.01 (d, C4\*), 128.41 (d, C3\*), 132.54 (d, C19''), 135.71 (d, C19), 136.48 (s, C2\*), 137.01 (s, C18''), 138.32 (s, C18), 144.00 (s, C10'), 175.59 (s, C28), 176.40 (s, C28''), 218.13 (s, C3).

**MS (ES):**  $m/z$  = 1240.4 [M+H]<sup>+</sup>; 1238.7 [M-H]<sup>-</sup>

1.28. (3β)-3-{[1-(2-{2-[2-(2-{[3,28-Dioxoolean-18-en-28-yl]amino}ethoxy)ethoxy]ethoxy}-ethyl)-1*H*-1,2,3-triazol-4-yl]methoxy}olean-12-en-28-oic acid (**6c**)

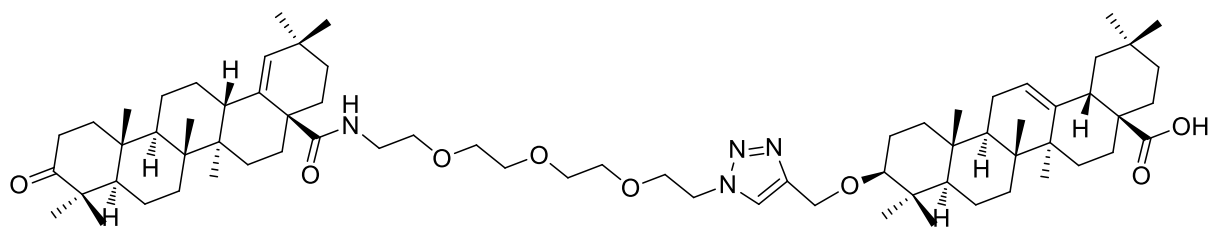

Procedure G was applied, using **5c** as the starting compound, yielding **6c** in a 93 % yield.

**<sup>1</sup>H NMR:**  $\delta$  0.73 (1H, dd,  $J_1=1.8$  Hz,  $J_2=11.5$  Hz, H5''), 0.74 (3H, s, H26''), 0.76 (3H, s, H27), 0.77 (3H, s, H25''), 0.90 (3H, s, H24''), 0.90 (3H, s, H29''), 0.91 (3H, s, H23''), 0.92 (3H, s, H30''), 0.93 (3H, d,  $J=0.7$  Hz, H25), 0.97 (3H, s, H30), 0.97 (3H, s, H26), 0.99 (3H, s, H29), 1.02 (3H, s, H24), 1.07 (3H, s, H23), 1.12 (3H, s, H27''), 1.82-1.90 (2H, m, H2''), 1.83 (2H, ddd,  $J_1=3.5$  Hz,  $J_2=4.8$  Hz,  $J_3=13.8$  Hz, H22), 1.94 (2H, ddd,  $J_1=5.1$  Hz,  $J_2=7.5$  Hz,  $J_3=12.8$  Hz, H1), 2.12-2.17 (1H, m, H13), 2.44-2.53 (2H, m, H2), 2.82 (1H, dd,  $J_1=4.2$  Hz,  $J_2=14.0$  Hz, H18''), 3.00 (1H, dd,  $J_1=4.3$  Hz,  $J_2=11.7$  Hz, H3''), 3.36-3.42 (2H, m, H1'), 3.47-3.52 (2H, m, H1'), 3.49-3.62 (2H, m, H3'), 3.49-3.62 (2H, m, H2'), 3.49-3.62 (2H, m, H5'), 3.49-3.62 (2H, m, H4'), 3.49-3.62 (2H, m, H6'), 3.90 (2H, t,  $J=5.1$  Hz, H7'), 4.59-4.62 (2H, m, H8'), 4.67 (2H, d,  $J=13.2$  Hz, H11'), 4.88 (2H, d,  $J=13.2$  Hz, H11'), 5.03 (1H, t,  $J=3.8$  Hz, H12''), 5.30 (1H, dd,  $J_1=0.7$  Hz,  $J_2=1.8$  Hz, H19), 7.85 (1H, s, H9').

**<sup>13</sup>C NMR:**  $\delta$  14.80 (q, C27), 15.33 (q, C24''), 15.86 (q, C26), 16.47 (q, C25''), 16.61 (q, C25), 17.09 (q, C26''), 18.22 (t, C6''), 19.58 (t, C6), 20.86 (q, C24), 21.56 (t, C11), 22.58 (t, C16''), 22.93 (t, C11''), 23.39 (t, C2''), 23.55 (q, C30''), 25.90 (q, C27''), 26.27 (t, C12), 26.89 (q, C23), 27.65 (st, C15''), 28.19 (q, C23''), 28.93 (q, C30), 29.27 (t, C15), 30.66 (s, C20''), 30.90 (q, C29), 32.29 (t, C21), 32.40 (t, C22), 32.40 (t, C22''), 32.60 (t, C7''), 33.05 (q, C29''), 33.17 (s, C20), 33.65 (t, C7), 33.78 (t, C21''), 33.94 (t, C16), 33.94 (t, C2), 36.86 (s, C10), 36.98 (s, C10''), 38.06 (t, C1''), 38.69 (s, C4''), 39.26 (s, C8''), 39.35 (t, C1'), 39.87 (t, C1), 40.54 (s, C8), 41.03 (d, C18''), 41.60 (s, C14''), 41.66 (d, C13), 42.63 (s, C14), 45.77 (d, C5), 45.84 (t, C19''), 46.43 (s, C17''), 47.24 (s, C4), 47.51 (d, C9''), 48.19 (s, C17), 50.38 (d, C9), 51.59 (t, C8'), 55.48 (d, C5''), 61.79 (t, C11'), 68.96 (t, C7'), 70.28 (t, C6'), 70.31 (t, C5'), 70.43 (t, C4'), 70.51 (t, C3'), 70.57 (t, C2'), 87.19 (d, C3''), 122.52 (d, C12''), 124.76 (d, C9'), 135.69 (d, C19), 138.33 (s, C18), 143.60 (s, C13''), 144.73 (s, C10'), 175.56 (s, C28), 181.96 (s, C28''), 218.48 (s, C3).

**MS (ES):**  $m/z$  = 1150.1 [M+H]<sup>+</sup>; 1148.1 [M-H]<sup>-</sup>

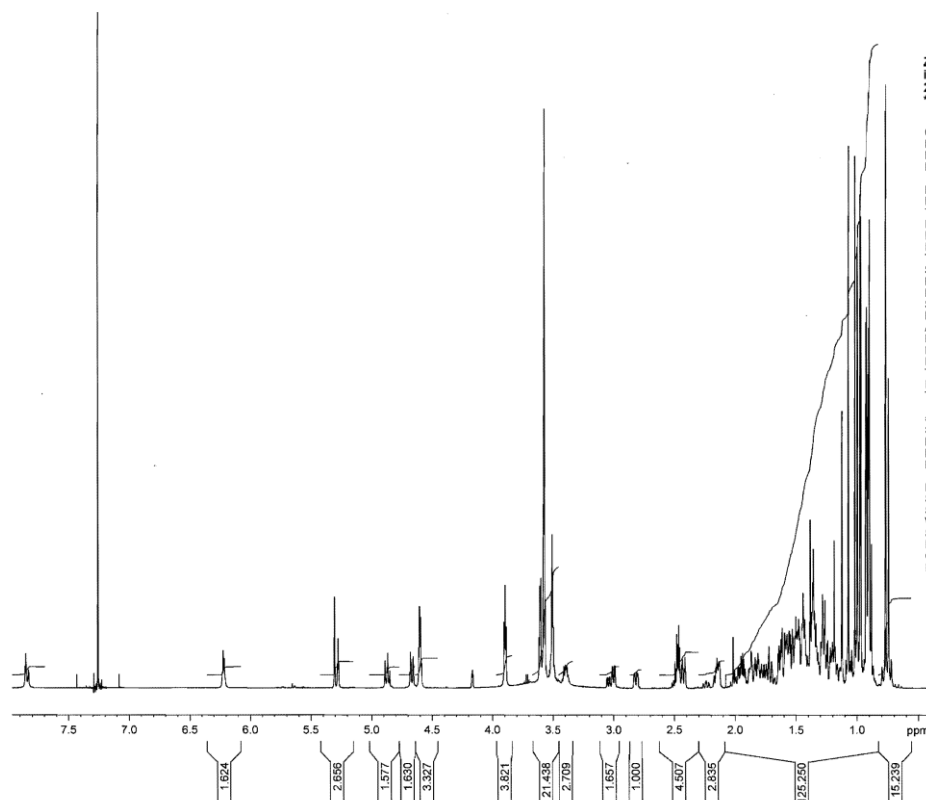

Z.Wimmer MC-38  
In CDCl<sub>3</sub>, ref=TMS  
27.8.2019 DA

Current Data Parameters  
NAME Wimmer-MC38  
EXPNO 1  
PROCNO 1

F2 - Acquisition Parameters  
Date 20190827  
Time 10.29  
INSTRUM spect  
PROBHD 5 mm CPTCI 1H-  
PULPROG zg30  
TD 43288  
SOLVENT CDCl<sub>3</sub>  
NS 32  
DS 0  
SWH 5411.255 Hz  
FIDRES 0.125006 Hz  
AQ 3.9998112 sec  
RG 31.82  
DW 92.400 usec  
DE 20.00 usec  
TE 298.1 K  
D1 0 sec  
D0 1

===== CHANNEL f1 =====  
SF01 600.1324005 MHz  
NUC1 1H  
P1 9.00 usec  
PLW1 6.00000000 W

F2 - Processing parameters  
SI 131072  
SF 600.1300143 MHz  
WDW no  
SSB 0  
LB 0 Hz  
GB 0  
PC 1.00

57966

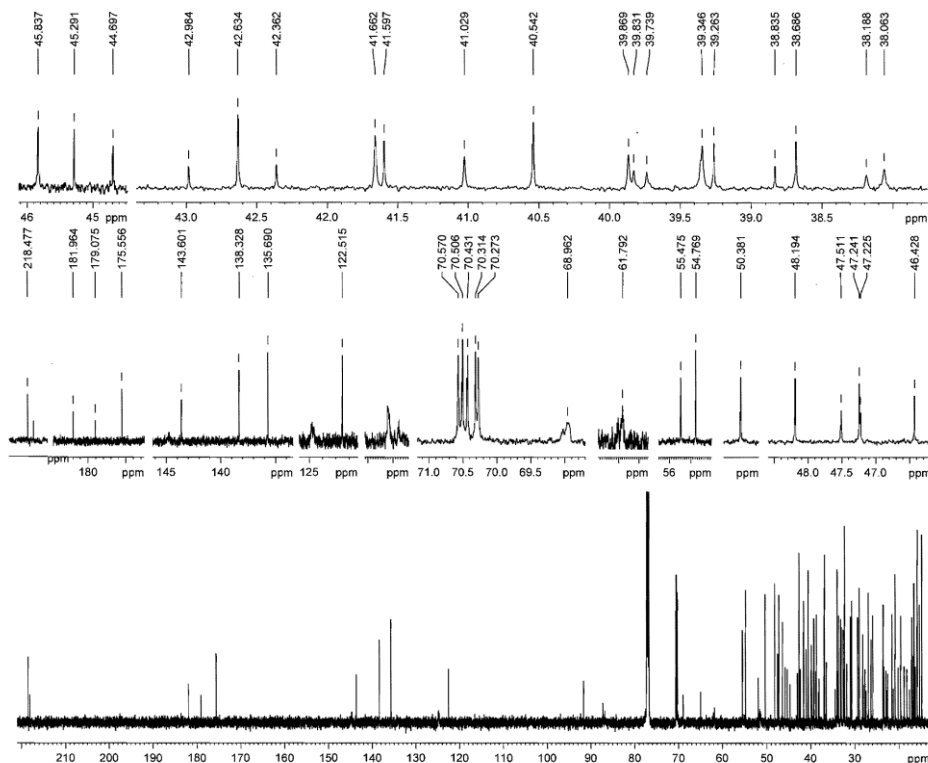

Z.Wimmer MC-38  
In CDCl<sub>3</sub>, ref=TMS  
27.8.2019 DA

Current Data Parameters  
NAME Wimmer-MC38  
EXPNO 2  
PROCNO 1

F2 - Acquisition Parameters  
Date 20190827  
Time 11.07  
INSTRUM spect  
PROBHD 5 mm CPTCI 1H-  
PULPROG zgpg30  
TD 72460  
SOLVENT CDCl<sub>3</sub>  
NS 1024  
DS 0  
SWH 38231.883 Hz  
FIDRES 0.500026 Hz  
AQ 0.9999480 sec  
RG 196.18  
DW 13.800 usec  
DE 18.00 usec  
TE 298.1 K  
D1 1.00000000 sec  
D11 0.03000000 sec  
D0 1

===== CHANNEL f1 =====  
SF01 150.9209173 MHz  
NUC1 13C  
P1 12.00 usec  
PLW1 80.00000000 W

===== CHANNEL f2 =====  
SF02 600.1324005 MHz  
NUC2 1H  
CPDPRG2 waltz16  
PCPD2 70.00 usec  
PLW2 6.00000000 W  
PLW12 0.09618400 W  
PLW13 0.04860000 W

F2 - Processing parameters  
SI 131072  
SF 150.9028136 MHz  
WDW EM  
SSB 0  
LB 1.00 Hz  
GB 0

57966



1.29. (3 $\beta$ )-3-[[1-(2-{2-[2-(2-{[3,28-Dioxoolean-18-en-28-yl]amino}ethoxy)ethoxy]ethoxy}-ethyl)-1*H*-1,2,3-triazol-4-yl]methoxy}olean-18-en-28-oic acid (**6d**)

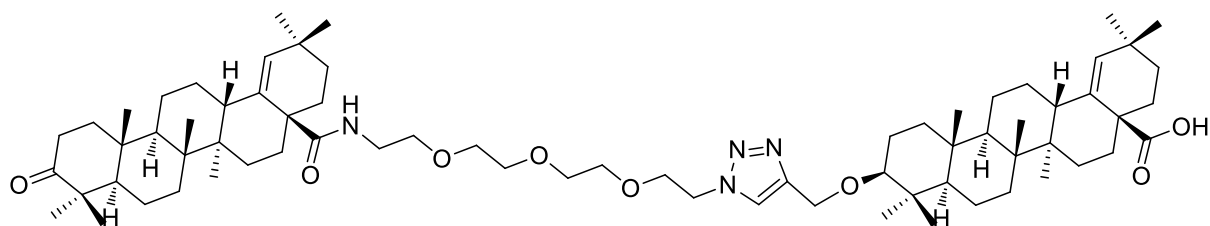

Procedure G was applied, using **5d** as the starting compound, yielding **6d** in a 93 % yield.

**<sup>1</sup>H NMR:**  $\delta$  0.73 (1H, dd,  $J_1=1.8$  Hz,  $J_2=11.5$  Hz, H5''), 0.74 (3H, s, H26''), 0.76 (3H, s, H27), 0.77 (3H, s, H25''), 0.90 (3H, s, H24''), 0.90 (3H, s, H29''), 0.91 (3H, s, H23''), 0.92 (3H, s, H30''), 0.93 (3H, d,  $J=0.7$  Hz, H25), 0.97 (3H, s, H30), 0.97 (3H, s, H26), 0.99 (3H, s, H29), 1.02 (3H, s, H24), 1.07 (3H, s, H23), 1.12 (3H, s, H27''), 1.82-1.90 (2H, m, H2''), 1.83 (2H, ddd,  $J_1=3.5$  Hz,  $J_2=4.8$  Hz,  $J_3=13.8$  Hz, H22), 1.94 (2H, ddd,  $J_1=5.1$  Hz,  $J_2=7.5$  Hz,  $J_3=12.8$  Hz, H1), 2.12-2.17 (1H, m, H13), 2.44-2.53 (2H, m, H2), 2.82 (1H, dd,  $J_1=4.2$  Hz,  $J_2=14.0$  Hz, H18''), 3.00 (1H, dd,  $J_1=4.3$  Hz,  $J_2=11.7$  Hz, H3''), 3.36-3.42 (2H, m, H1'), 3.47-3.52 (2H, m, H1'), 3.49-3.62 (2H, m, H3'), 3.49-3.62 (2H, m, H2'), 3.49-3.62 (2H, m, H5'), 3.49-3.62 (2H, m, H4'), 3.49-3.62 (2H, m, H6'), 3.90 (2H, t,  $J=5.1$  Hz, H7'), 4.59-4.62 (2H, m, H8'), 4.67 (2H, d,  $J=13.2$  Hz, H11'), 4.88 (2H, d,  $J=13.2$  Hz, H11'), 5.03 (1H, t,  $J=3.8$  Hz, H12''), 5.30 (1H, dd,  $J_1=0.7$  Hz,  $J_2=1.8$  Hz, H19), 7.85 (1H, s, H9').

**<sup>13</sup>C NMR:**  $\delta$  14.80 (q, C27), 15.33 (q, C24''), 15.86 (q, C26), 16.47 (q, C25''), 16.61 (q, C25), 17.09 (q, C26''), 18.22 (t, C6''), 19.58 (t, C6), 20.86 (q, C24), 21.56 (t, C11), 22.58 (t, C16''), 22.93 (t, C11''), 23.39 (t, C2''), 23.55 (q, C30''), 25.90 (q, C27''), 26.27 (t, C12), 26.89 (q, C23), 27.65 (st, C15''), 28.19 (q, C23''), 28.93 (q, C30), 29.27 (t, C15), 30.66 (s, C20''), 30.90 (q, C29), 32.29 (t, C21), 32.40 (t, C22), 32.40 (t, C22''), 32.60 (t, C7''), 33.05 (q, C29''), 33.17 (s, C20), 33.65 (t, C7), 33.78 (t, C21''), 33.94 (t, C16), 33.94 (t, C2), 36.86 (s, C10), 36.98 (s, C10''), 38.06 (t, C1''), 38.69 (s, C4''), 39.26 (s, C8''), 39.35 (t, C1'), 39.87 (t, C1), 40.54 (s, C8), 41.03 (d, C18''), 41.60 (s, C14''), 41.66 (d, C13), 42.63 (s, C14), 45.77 (d, C5), 45.84 (t, C19''), 46.43 (s, C17''), 47.24 (s, C4), 47.51 (d, C9''), 48.19 (s, C17), 50.38 (d, C9), 51.59 (t, C8'), 55.48 (d, C5''), 61.79 (t, C11'), 68.96 (t, C7'), 70.28 (t, C6'), 70.31 (t, C5'), 70.43 (t, C4'), 70.51 (t, C3'), 70.57 (t, C2'), 87.19 (d, C3''), 122.52 (d, C12''), 124.76 (d, C9'), 135.69 (d, C19), 138.33 (s, C18), 143.60 (s, C13''), 144.73 (s, C10'), 175.56 (s, C28), 181.96 (s, C28''), 218.48 (s, C3).

**MS (ES):**  $m/z = 1150.1 [M+H]^+$ ;  $1148.1 [M-H]^-$

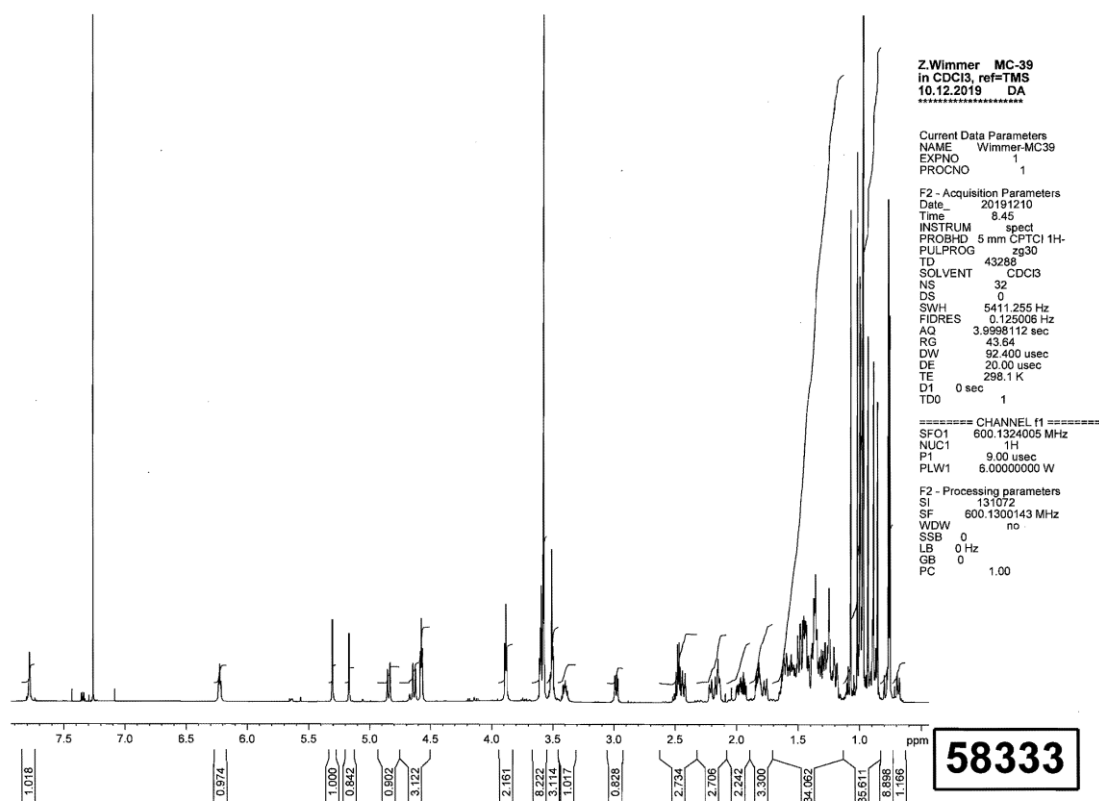

Z.Wimmer MC-39  
in CDCl<sub>3</sub>, ref=TMS  
10.12.2019 DA

Current Data Parameters  
NAME Wimmer-MC39  
EXPNO 1  
PROCNO 1

F2 - Acquisition Parameters  
Date\_ 20191210  
Time 8.45  
INSTRUM spect  
PROBHD 5 mm CPTCI 1H-  
PULPROG zg30  
TD 43288  
SOLVENT CDCl<sub>3</sub>  
NS 32  
DS 0  
SWH 5411.255 Hz  
FIDRES 0.125006 Hz  
AQ 3.9998112 sec  
RG 43.64  
DW 92.400 usec  
DE 20.00 usec  
TE 298.1 K  
D1 0 sec  
TD0 1

===== CHANNEL f1 =====  
SFO1 600.1324005 MHz  
NUC1 1H  
P1 9.00 usec  
PLW1 6.00000000 W

F2 - Processing parameters  
SI 131072  
SF 600.1300143 MHz  
WDW no  
SSB 0  
LB 0 Hz  
GB 0  
PC 1.00

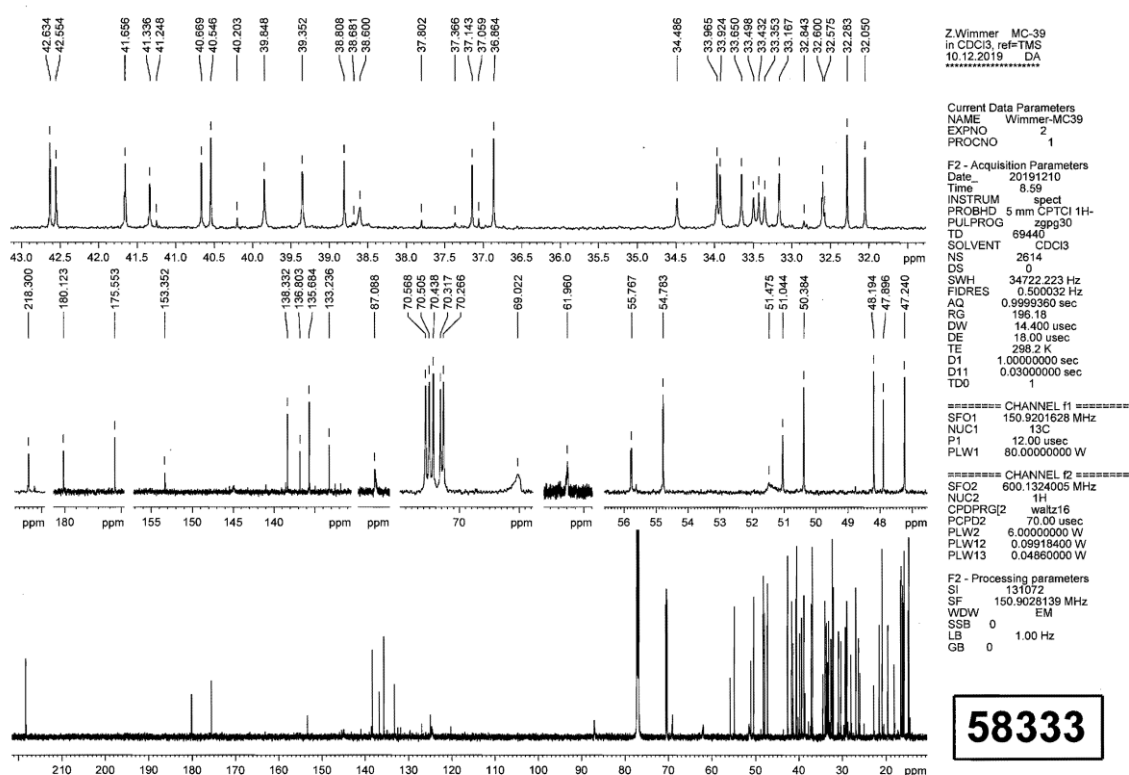

1.30. (3 $\beta$ )-28-[(2-{2-[2-(2-{4-[(3 $\beta$ )-28-[(2-{2-[2-(2-Azidoethoxy)ethoxy]ethoxy}ethyl)-amino]-28-oxoolean-18-en-3-yl}oxy)methyl]-1*H*-1,2,3-triazol-1-yl}ethoxy)ethoxy]ethoxy}-ethyl)amino]-28-oxoolean-18-en-28-oate (**7d**)

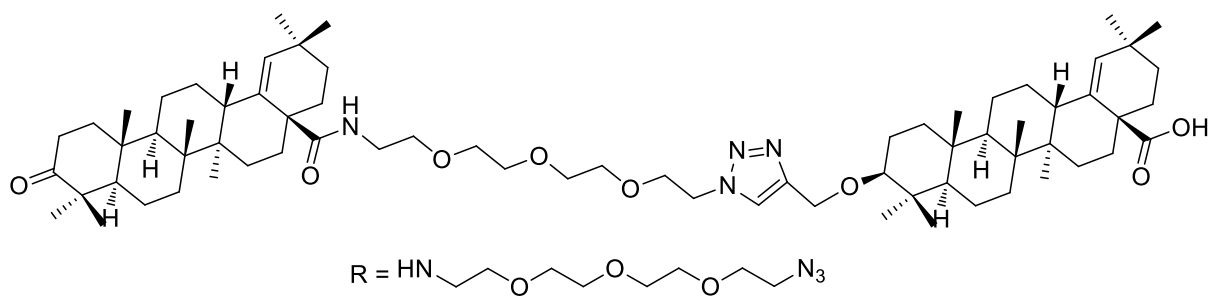

Procedure E was applied, using **6d** as the starting compound, yielding **7d** in a 67 % yield.

$^1\text{H}$  NMR:  $\delta$  0.69 (1H, dd,  $J_1=2.0$  Hz,  $J_2=11.2$  Hz, H5"), 0.75 (3H, s, H27), 0.76 (3H, s, H25"), 0.77 (3H, s, H27"), 0.86 (3H, s, H24"), 0.90 (3H, s, H23"), 0.93 (3H, d,  $J=0.7$  Hz, H25), 0.96 (3H, s, H26"), 0.97 (3H, s, H26), 0.98 (3H, s, H30), 0.98 (3H, s, H30"), 1.00 (3H, s, H29), 1.01 (3H, s, H29"), 1.02 (3H, s, H24), 1.07 (3H, s, H23), 1.78 (2H, dt,  $J_1=3.4$  Hz,  $J_2=3.4$  Hz,  $J_3=13.2$  Hz, H1"), 1.83 (2H, ddd,  $J_1=3.5$  Hz,  $J_2=5.0$  Hz,  $J_3=13.6$  Hz, H22), 1.95 (2H, ddd,  $J_1=5.3$  Hz,

$J_2=7.3$  Hz,  $J_3=12.8$  Hz, H1), 2.11-2.15 (1H, m, H13), 2.11 (1H, m, H13''), 2.42 (2H, dt,  $J_1=3.5$  Hz,  $J_2=3.5$  Hz,  $J_3=13.6$  Hz, H16''), 2.46 (2H, ddd,  $J_1=5.3$  Hz,  $J_2=8.3$  Hz,  $J_3=15.8$  Hz, H2), 2.49 (2H, ddd,  $J_1=7.3$  Hz,  $J_2=8.9$  Hz,  $J_3=15.8$  Hz, H2), 3.01 (2H, dd,  $J_1=4.5$  Hz,  $J_2=11.8$  Hz, H2''), 3.37-3.40 (2H, m, H8\*), 3.40-3.45 (2H, m, H1'), 3.40-3.48 (2H, m, H1\*), 3.49-3.53 (2H, m, H1'), 3.56-3.68 (2H, m, H2'), 3.56-3.68 (2H, m, H2\*), 3.56-3.68 (2H, m, H5\*), 3.56-3.68 (2H, m, H4\*), 3.56-3.68 (2H, m, H3\*), 3.56-3.68 (2H, m, H3'), 3.56-3.68 (2H, m, H7\*), 3.56-3.68 (2H, m, H6'), 3.56-3.68 (2H, m, H4'), 3.56-3.68 (2H, m, H5'), 3.56-3.68 (2H, m, H6\*), 3.92-3.95 (2H, m, H7'), 4.63-4.67 (2H, m, H8'), 4.78 (2H, d,  $J=13.2$  Hz, H11'), 5.00 (2H, d,  $J=13.2$  Hz, H11'), 5.31 (1H, dd,  $J_1=0.8$  Hz,  $J_2=1.8$  Hz, H19), 5.31 (1H, dd,  $J_1=0.7$  Hz,  $J_2=1.8$  Hz, H19''), 8.02 (1H, s, H9').

**$^{13}\text{C}$  NMR:**  $\delta$  14.80 (q, C27), 14.91 (q, C27''), 15.86 (q, C26''), 16.03 (q, C26), 16.59 (q, C25), 16.72 (q, C24''), 17.29 (q, C25''), 18.12 (t, C6''), 19.59 (t, C6), 20.88 (q, C24), 21.02 (t, C11''), 21.56 (t, C11), 22.71 (t, C2''), 24.64 (s, C14), 26.02 (t, C12''), 26.26 (t, C12), 26.88 (q, C23), 28.03 (q, C23''), 28.93 (q, C30''), 28.93 (q, C30), 29.27 (t, C15), 29.33 (t, C15''), 30.88 (q, C29''), 30.90 (q, C29), 32.28 (s, C20''), 32.29 (s, C20), 32.61 (t, C16''), 32.70 (t, C16), 33.18 (t, C21), 33.18 (t, C21''), 33.65 (t, C7), 33.94 (t, C22), 33.94 (t, C22''), 33.98 (t, C2), 34.42 (t, C7''), 36.87 (s, C10), 37.14 (s, C10''), 38.59 (s, C8''), 38.79 (t, C1\*), 39.33 (t, C1''), 39.36 (t, C1'), 39.83 (t, C1), 40.55 (s, C8), 40.70 (s, C14''), 41.53 (d, C13''), 42.61 (s, C4''), 42.66 (d, C13), 47.22 (s, C4), 48.20 (s, C17), 48.21 (s, C17''), 50.38 (d, C9), 50.65 (t, C8\*), 51.04 (d, C9''), 51.72 (t, C8'), 54.77 (d, C5), 55.76 (d, C5''), 61.65 (t, C11'), 68.93 (t, C7'), 70.07 (t, C7\*), 70.26 (t, C6\*), 70.31 (t, C5\*), 70.35 (t, C4\*), 70.37 (t, C3\*), 70.45 (t, C2\*), 70.53 (t, C6'), 70.57 (t, C5'), 70.59 (t, C4'), 70.63 (t, C3'), 70.68 (t, C2'), 87.14 (d, C3''), 125.00 (d, C9'), 135.61 (d, C19), 135.62 (d, C19''), 138.35 (s, C18''), 138.40 (s, C18), 144.62 (s, C10'), 175.54 (s, C28''), 175.55 (s, C28), 218.12 (s, C3).

**MS (ES):**  $m/z = 1350.3$   $[\text{M}+\text{H}]^+$

1.31. [1-(2-{2-[2-(2-{[(3 $\beta$ )-3-{[1-(2-{2-[2-(2-{[3,28-Dioxoolean-18-en-28-yl]amino}ethoxy)-ethoxy]ethoxy}ethyl)-1*H*-1,2,3-triazol-4-yl]methoxy}-28-oxoolean-18-en-28-yl]amino}-ethoxy)ethoxy]ethoxy}ethyl)-1*H*-1,2,3-triazol-4-yl]methyl 3-oxoolean-18-en-28-oate (**8d**)

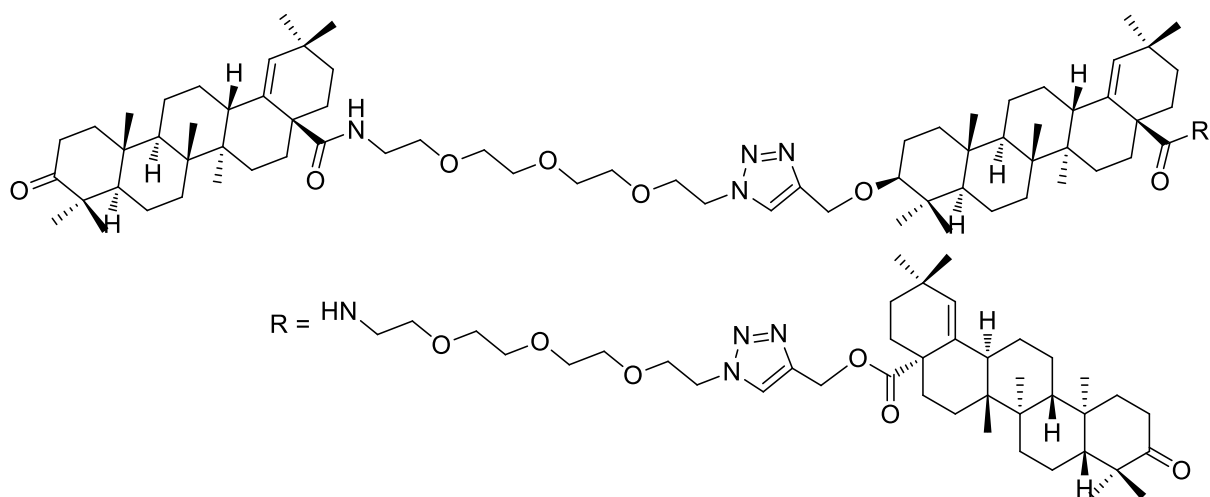

Procedure F was applied, using **7d** and **2c** as the starting compounds, yielding **8d** in a 99 % yield.

**<sup>1</sup>H NMR:** δ 0.68 (dd,  $J_1=2.1$  Hz,  $J_2=11.5$  Hz, H5''), 0.74 (s, H27''), 0.75 (s, H27), 0.75 (s, H27\*), 0.77 (s, H26), 0.78 (s, H26\*), 0.85 (s, H23''), 0.88 (s, H26''), 0.91 (s, H24''), 0.92 (d,  $J=0.6$  Hz, H25\*), 0.93 (d,  $J=0.7$  Hz, H25), 0.94 (s, H25''), 0.95 (s, H30\*), 0.97 (s, H29\*), 0.98 (s, H30''), 0.98 (s, H30), 1.00 (s, H29''), 1.00 (s, H29), 1.01 (s, H24\*), 1.02 (s, H24), 1.06 (s, H23\*), 1.07 (s, H23), 1.87 (ddd,  $J_1=4.3$  Hz,  $J_2=5.1$  Hz,  $J_3=13.2$  Hz, H1''), 1.93 (ddd,  $J_1=4.8$  Hz,  $J_2=76.0$  Hz,  $J_3=13.0$  Hz, H1\*), 1.95 (ddd,  $J_1=5.2$  Hz,  $J_2=7.2$  Hz,  $J_3=12.8$  Hz, H1), 2.99 (dd,  $J_1=4.4$  Hz,  $J_2=11.7$  Hz, H3''), 3.38-3.42 (m, H1'''), 3.38-3.42 (m, H1'), 3.46-3.53 (m, H1'''), 3.46-3.53 (m, H1'), 3.86 (t,  $J=5.2$  Hz, H7'''), 3.89-3.92 (m, H7'), 4.50-4.53 (m, H8'''), 4.59-4.62 (m, H8'), 4.67 (d,  $J=12.8$  Hz, H11'), 4.67 (d,  $J=12.8$  Hz, H11'''), 4.90 (d,  $J=12.8$  Hz, H11'), 4.90 (d,  $J=12.8$  Hz, H11'''), 5.11 (d,  $J=1.4$  Hz, H19\*), 5.31 (bd,  $J=1.6$  Hz, H19), 7.73 (s, H9'), 7.89 (bs, H9'').

**<sup>13</sup>C NMR:** δ 14.80 (C27), 14.85 (C27\*), 14.92 (C27"), 15.39 (C26\*), 15.86 (C26"), 16.03 (C26), 16.52 (C25), 16.59 (C25\*), 16.73 (C25"), 18.11 (C6"), 19.57 (C6), 19.59 (C6\*), 20.88 (C24), 20.91 (C24\*), 21.01 (C11"), 21.02 (C24"), 21.43 (C11\*), 21.56 (C11), 22.67 (C2"), 25.88 (C12"), 26.23 (C12\*), 26.26 (C12), 26.82 (C23), 26.89 (C23\*), 28.03 (C23"), 28.94 (C30"), 28.94 (C30), 29.03 (C30\*), 29.26 (C15"), 29.27 (C15), 29.32 (C15\*), 30.41 (C29\*), 30.91 (C29), 30.91 (C29"), 31.98 (C21\*), 32.29 (C21), 32.29 (C21"), 32.67 (C16"), 33.18 (C20), 33.19 (C20"), 33.22 (C20\*), 33.41 (C22\*), 33.41 (C7), 33.66 (C22), 33.66 (C7\*), 33.94 (C16\*), 33.94 (C16), 33.98 (C2), 34.02 (C2\*), 34.03 (C22"), 34.40 (C7"), 36.86 (C10), 36.87 (C10\*), 37.13 (C10"), 38.57 (C8"), 38.78 (C1"), 39.32 (C1'), 39.36 (C1""), 39.78 (C1\*), 39.83 (C1), 40.44 (C8\*), 40.55 (C8), 40.70 (C4"), 40.70 (C14"), 41.23 (C13\*), 41.55 (C13"), 41.67

(C13), 42.44 (C14\*), 42.62 (C14), 47.22 (C4\*), 47.22 (C4), 48.04 (C17\*), 48.20 (C17), 48.20 (C17"), 50.35 (C9\*), 50.38 (C9), 51.01 (C9"), 51.84 (C8"), 51.97 (C8'), 54.76 (C5), 54.79 (C5\*), 55.73 (C5"), 57.37 (C11"), 61.78 (C11'), 68.83 (C7'), 69.33 (C7"), 70.31 (C5"), 70.31 (C6"), 70.31 (C6'), 70.33 (C5'), 70.45 (C4"), 70.48 (C4'), 70.53 (C3'), 70.53 (C3"), 70.54 (C2'), 70.59 (C2"), 87.18 (C3"), 124.98 (C9'), 125.19 (C9"), 132.86 (C19"), 135.60 (C19\*), 135.68 (C19), 136.69 (C18"), 138.33 (C18), 138.43 (C18\*), 142.77 (C10"), 144.78 (C10'), 175.56 (C28), 175.75 (C28"), 176.50 (C28\*), 218.12 (C3), 218.19 (C3\*).

**MS (ES):**  $m/z = 1842.3$   $[M+H]^+$

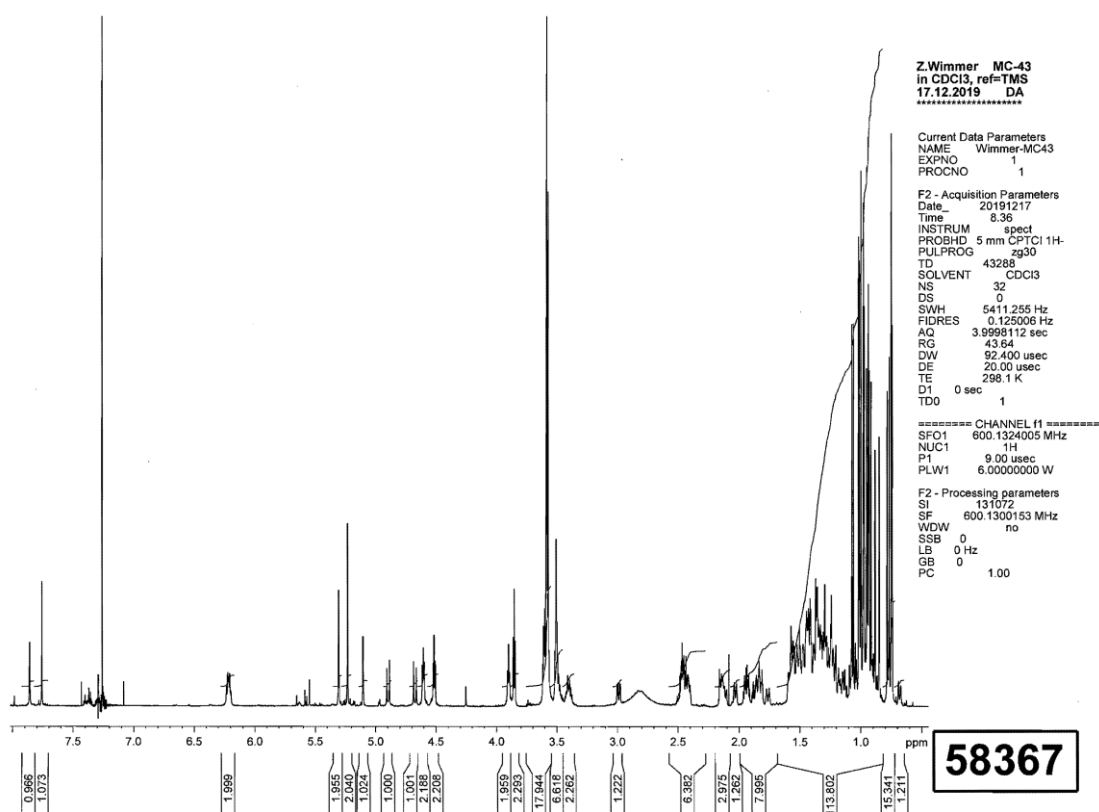

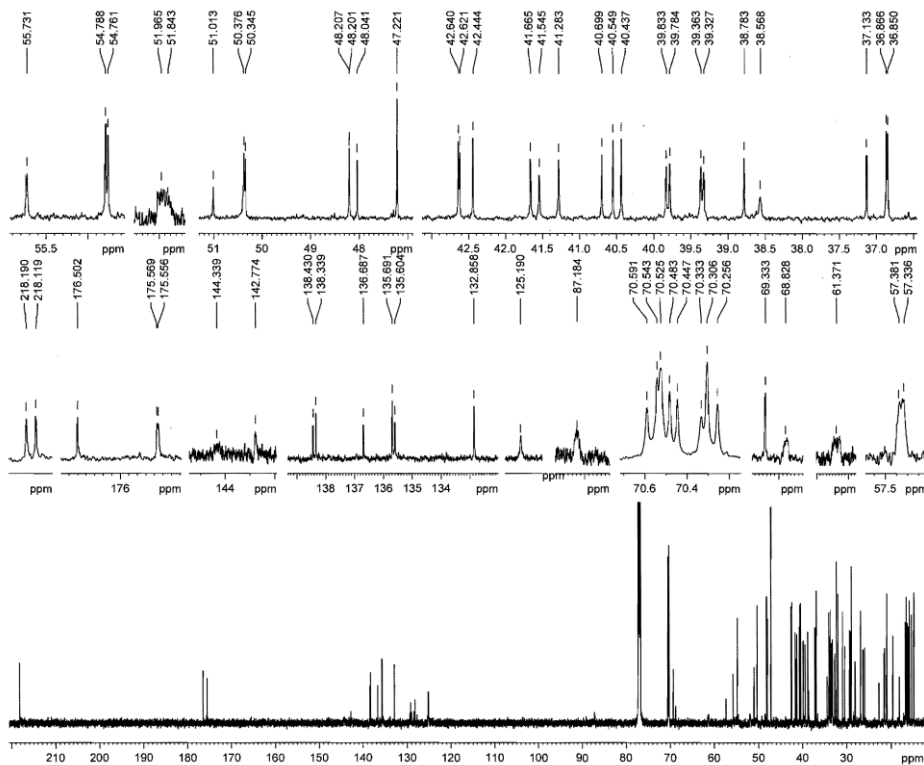

ZWimmer MC-43  
in CDCl3, ref=TMS  
17.12.2019 DA

Current Data Parameters  
NAME Wimmer-MC43  
EXPNO 2  
PROCNO 1

F2 - Acquisition Parameters  
Date\_ 20191217  
Time 11.36  
INSTRUM spect  
PROBHD 5 mm CPTCI 1H-  
PULPROG zgpg30  
TD 69440  
SOLVENT CDCl3  
NS 3596  
DS 0  
SWH 34722.223 Hz  
FIDRES 0.500032 Hz  
AQ 0.9999360 sec  
RG 196.18  
DW 14.400 usec  
DE 18.00 usec  
TE 298.2 K  
D1 1.00000000 sec  
D11 0.03000000 sec  
TD0 1

===== CHANNEL f1 =====  
SFO1 150.9201628 MHz  
NUC1 13C  
P1 12.00 usec  
PLW1 80.00000000 W  
===== CHANNEL f2 =====  
SFO2 600.1324005 MHz  
NUC2 1H  
CPDPRG2 waltz16  
PCPD2 70.00 usec  
PLW2 6.00000000 W  
PLW12 0.09918400 W  
PLW13 0.04860000 W

F2 - Processing parameters  
SI 131072  
SF 150.9028135 MHz  
WDW EM  
SSB 0  
LB 1.00 Hz  
GB 0

58367

## 2. Antimicrobial screening tests

Antimicrobial activity of the target molecular ribbons **8a**, **12a**, **8b**, **12b**, **4c**, **6c**, **6d** and **8d**, and that of **1a–1c** was studied *in vitro*, using *Bacillus cereus*, *Escherichia coli*, *Pseudomonas aeruginosa*, *Staphylococcus aureus* and *Enterococcus faecalis*. The resazurine test was used to evaluate this activity.

Table S1 shows the complete data on antimicrobial activity of the target triterpenoid molecular ribbons which have been achieved in this investigation.

**Table S1.** Antimicrobial activity, inhibition of the microorganism [%]

| Comp.      | <i>Staphylococcus aureus</i>     |                                  |                                  | Comp.      | <i>Escherichia coli</i>          |                                  |                                  |
|------------|----------------------------------|----------------------------------|----------------------------------|------------|----------------------------------|----------------------------------|----------------------------------|
|            | <i>c</i> = 100                   | <i>c</i> = 50                    | <i>c</i> = 25                    |            | <i>c</i> = 100                   | <i>c</i> = 50                    | <i>c</i> = 25                    |
|            | $\mu\text{g}\cdot\text{mL}^{-1}$ | $\mu\text{g}\cdot\text{mL}^{-1}$ | $\mu\text{g}\cdot\text{mL}^{-1}$ |            | $\mu\text{g}\cdot\text{mL}^{-1}$ | $\mu\text{g}\cdot\text{mL}^{-1}$ | $\mu\text{g}\cdot\text{mL}^{-1}$ |
| <b>8a</b>  | 68 ± 10.2                        | 55 ± 8.3                         | 52 ± 7.8                         | <b>8a</b>  | -                                | 24 ± 3.6                         | 51 ± 7.7                         |
| <b>8b</b>  | 77 ± 11.6                        | 24 ± 3.6                         | —                                | <b>8b</b>  | 31 ± 4.7                         | 25 ± 3.8                         | 17 ± 2.6                         |
| <b>12a</b> | 59 ± 8.9                         | 52 ± 7.8                         | 28 ± 4.2                         | <b>12a</b> | -                                | -                                | -                                |
| <b>12b</b> | 59 ± 8.9                         | 33 ± 5.0                         | 40 ± 6.0                         | <b>12b</b> | -                                | -                                | -                                |
| <b>4c</b>  | 76 ± 11.4                        | 66 ± 9.9                         | 11 ± 1.7                         | <b>4c</b>  | 31 ± 4.7                         | 34 ± 5.1                         | 25 ± 3.8                         |
| <b>6c</b>  | 27 ± 4.0                         | 51 ± 7.7                         | 13 ± 2.0                         | <b>6c</b>  | 30 ± 4.5                         | 18 ± 2.7                         | 10 ± 1.5                         |
| <b>6d</b>  | -                                | 31 ± 4.7                         | 25 ± 3.8                         | <b>6d</b>  | -                                | 13 ± 2.0                         | 9 ± 1.4                          |
| <b>8d</b>  | 19 ± 2.9                         | 19 ± 2.9                         | 11 ± 1.7                         | <b>8d</b>  | 14 ± 2.1                         | 17 ± 2.6                         | 12 ± 1.8                         |
| <b>1a</b>  | 33 ± 5.0                         | 8 ± 1.2                          | —                                | <b>1a</b>  | -                                | -                                | -                                |
| <b>1b</b>  | 47 ± 7.0                         | 17 ± 2.6                         | 21 ± 3.2                         | <b>1b</b>  | -                                | 2 ± 0.3                          | -                                |
| <b>1c</b>  | 10 ± 1.5                         | 3 ± 0.5                          | —                                | <b>1c</b>  | -                                | -                                | -                                |

  

| Comp.      | <i>Bacillus cereus</i>           |                                  |                                  | Comp.      | <i>Pseudomonas aeruginosa</i>    |                                  |                                  |
|------------|----------------------------------|----------------------------------|----------------------------------|------------|----------------------------------|----------------------------------|----------------------------------|
|            | <i>c</i> = 100                   | <i>c</i> = 50                    | <i>c</i> = 25                    |            | <i>c</i> = 100                   | <i>c</i> = 50                    | <i>c</i> = 25                    |
|            | $\mu\text{g}\cdot\text{mL}^{-1}$ | $\mu\text{g}\cdot\text{mL}^{-1}$ | $\mu\text{g}\cdot\text{mL}^{-1}$ |            | $\mu\text{g}\cdot\text{mL}^{-1}$ | $\mu\text{g}\cdot\text{mL}^{-1}$ | $\mu\text{g}\cdot\text{mL}^{-1}$ |
| <b>8a</b>  | -                                | -                                | -                                | <b>8a</b>  | 14 ± 2.1                         | 17 ± 2.6                         | 21 ± 3.2                         |
| <b>8b</b>  | -                                | 38 ± 5.7                         | 16 ± 2.4                         | <b>8b</b>  | 60 ± 9.0                         | 59 ± 8.9                         | 33 ± 5.0                         |
| <b>12a</b> | -                                | 7 ± 1.0                          | 4 ± 0.6                          | <b>12a</b> | -                                | -                                | -                                |
| <b>12b</b> | 5 ± 8.0                          | 13 ± 2.0                         | 12 ± 1.8                         | <b>12b</b> | 35 ± 5.3                         | 8 ± 1.2                          | 11 ± 1.7                         |
| <b>4c</b>  | 6 ± 9.0                          | -                                | 2 ± 0.3                          | <b>4c</b>  | 46 ± 6.8                         | 47 ± 7.0                         | 50 ± 7.5                         |
| <b>6c</b>  | 13 ± 2.0                         | 19 ± 2.9                         | 7 ± 1.0                          | <b>6c</b>  | 60 ± 9.0                         | 69 ± 10.4                        | 12 ± 1.8                         |



|           |           |           |           |           |   |         |          |
|-----------|-----------|-----------|-----------|-----------|---|---------|----------|
| <b>6d</b> | 3 ± 0.5   | -         | 1 ± 0.2   | <b>6d</b> | - | -       | -        |
| <b>8d</b> | 5 ± 8.0   | 10 ± 1.5  | 13 ± 2.0  | <b>8d</b> | - | 9 ± 1.4 | 16 ± 2.4 |
| <b>1a</b> | 77 ± 11.6 | 77 ± 11.6 | 76 ± 11.4 | <b>1a</b> | - | -       | -        |
| <b>1b</b> | 75 ± 11.3 | 76 ± 11.4 | 78 ± 11.7 | <b>1b</b> | - | -       | -        |
| <b>1c</b> | 66 ± 9.9  | 15 ± 2.3  | -         | <b>1c</b> | - | -       | -        |

  

| Comp.      | <i>Enterococcus faecalis</i> |                     |                     | Comp.     | <i>Enterococcus faecalis</i> |                     |                     |
|------------|------------------------------|---------------------|---------------------|-----------|------------------------------|---------------------|---------------------|
|            | <i>c</i> = 100               | <i>c</i> = 50       | <i>c</i> = 25       |           | <i>c</i> = 100               | <i>c</i> = 50       | <i>c</i> = 25       |
|            | μg·mL <sup>-1</sup>          | μg·mL <sup>-1</sup> | μg·mL <sup>-1</sup> |           | μg·mL <sup>-1</sup>          | μg·mL <sup>-1</sup> | μg·mL <sup>-1</sup> |
| <b>8a</b>  | 32 ± 4.8                     | 28 ± 4.2            | 17 ± 2.6            | <b>6d</b> | 28 ± 4.2                     | 14 ± 2.1            | 2 ± 0.3             |
| <b>8b</b>  | 54 ± 8.1                     | 43 ± 6.5            | 20 ± 3.0            | <b>8d</b> | 23 ± 3.5                     | 33 ± 5.0            | 37 ± 5.6            |
| <b>12a</b> | 2 ± 0.3                      | -                   | -                   | <b>1a</b> | 89 ± 13.4                    | 90 ± 13.5           | 87 ± 13.0           |
| <b>12b</b> | -                            | -                   | -                   | <b>1b</b> | 69 ± 10.4                    | 64 ± 9.6            | 38 ± 5.7            |
| <b>4c</b>  | 43 ± 6.5                     | 50 ± 7.5            | 62 ± 9.3            | <b>1c</b> | -                            | -                   | -                   |
| <b>6c</b>  | 36 ± 5.4                     | 25 ± 3.8            | -                   |           |                              |                     |                     |

### 3. Gel formation and supramolecular self-assembly

Among the studied series of compounds, the only **4c**, **6c** and **6d** produced a gel in glycerol, **8a** in ethylene glycol, which is shown in Figure S1 as an example.

**Figure S1.** Gel of **8a** in ethylene glycol.

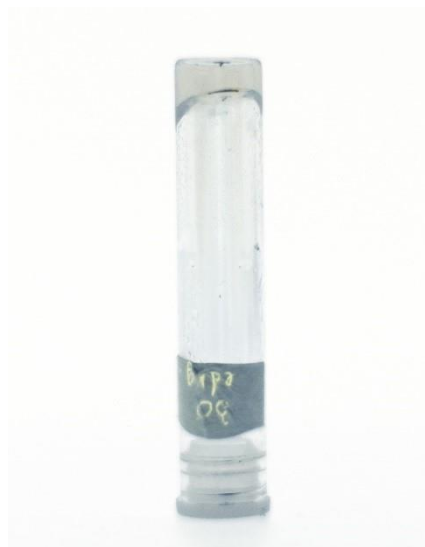

Supramolecular self-assembly was studied on the basis of the UV-VIS spectra of the compounds in several methanol/water mixtures stepwise during the time interval 0-140 h. Here we show compounds **8a**, **12a**, **12b** and **6d** as examples, with which the irregularities in the UV-VIS spectra were either well pronounced (**8a** and **12a**; Figure S2), or no substantial irregularity was detected (**12b** and **6d**).

**Figure S2.** UV-VIS spectra of **8a** (top) and **12a** (bottom) measured in the interval 0-140 h.

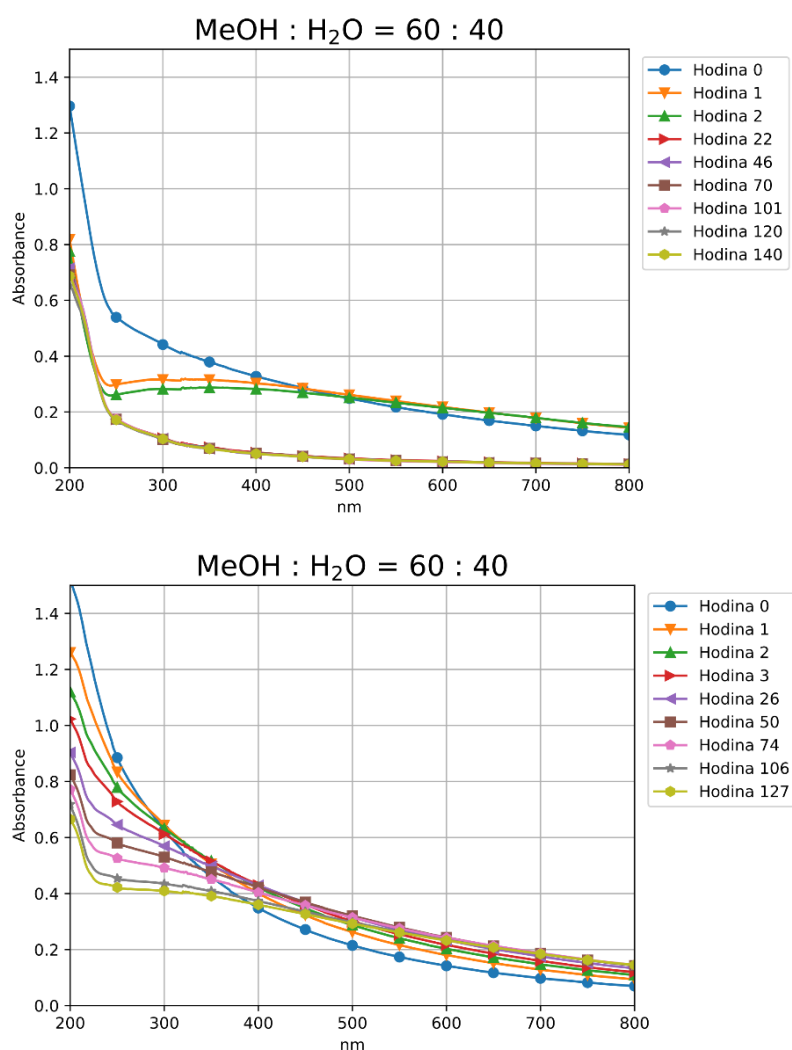

Compound **8a**: Irregularity was detected in hours 1 and 2 at the methanol / water (60 / 40) ratio. During that time interval a new maximum appeared at 300 nm wavelength, and the shape of the curves is different than in any of the other intervals of measurement.

Compound **12a**: A sequence of decreasing absorbance value is regular with increasing time of measurement up to 300 – 350 nm wavelength. Irregularities were detected in the area above 350 nm wavelength.

Compound **12b**: No substantial irregularity was detected.

Compound **6d**: No substantial irregularity was detected.
